# Supplementary material
Source: publisher figshare collection journal article supplement (https://gsapubs.figshare.com/articles/dataset/_/13393247)
Supplement: Supplementary file 1 [file 1]

## Sheet: Table S1 Sample
Table S1. Sample location and lithology
Sample name	Lithology	Latitude	Longitude
MC13ST-1	Garnet amphibolite	N44° 8'44.8"	W115°0'22.2"
MC13ST-2	Sillimanite-garnet-biotite migmatite	N44° 8'49"	W115°0'45.2"
MC13ST-4	Quartzofeldspathic gneiss	N44° 8'49.6"	W115°0'0.5"
MC13ST-5	Unfoliated granitoid	N44° 8'49.4"	W115°0'2.3"
MC13ST-14	Unfoliated granitoid	N44° 8'45.5"	W115°0'29.9"
MC13ST-17	Metagabbro	N44° 8'56.6"	W114°59'22.3"
MC13ST-18	Magmatically foliated granitoid	N44° 8'56.6"	W114°59'22.3"
MC14ST-1	Mylonitic granitoid	N44°09'26.3"	W114°59'48.8"
MC14ST-4	Magmatically foliated granitoid	N44°09'24.8"	W115°00'01.7"
MC14ST-8	Magmatically foliated granitoid	N44°09'17.4"	W114°59'39.5"
MC14ST-9	Unfoliated granitoid	N44°08'48.8"	W115°00'02.6"
MC14ST-10	Unfoliated but boudinaged granitoid	N44°08'48.5"	W115°00'58.7"
MC14ST-12A	Magmatically foliated granitoid	N44°08'49.2"	W115°00'45.0"
MC14ST-13	Magmatically foliated granitoid	N44°08'49.3"	W114°59'47.0"
MC14ST-19	Magmatically foliated granitoid	N44°09'27.8"	W115°03'08.5"
MC14ST-21	Magmatically foliated granitoid	N44°09'14.7"	W115°03'08.1"
MC14ST-25	Unfoliated granitoid	N44°05'51.0"	W114°57'55.7"

## Sheet: Table S2 Major & Trace
Table S2. Whole-rock major and trace element data
	Metagabbro			Mylonitic granitoid		Magmatically foliated granitoid							Massive granitoid						Metamorphic rocks				Standards
	MC13ST-17A	MC13ST-17B		MC14ST-1		MC14ST-12A	MC14ST-8	MC14ST-13	MC14ST-4	MC14ST-19	MC13ST-18		MC14ST-25	MC14ST-10	MC13ST-14	MC13ST-5	MC14ST-9		MC13ST-1	MC13ST-2	MC13ST-4		1_RGM-1	2_RGM-1	3_RGM-1	4_AGV-1	5_AGV-1	6_AGV-1	7_AGV-1	8_AGV-1	9_BCR-1	10_BCR-1
SiO2		51.7232		73.1134		77.378	75.696	69.8036	79.1538	67.3621	67.1214		73.781	76.823	74.7105	77.3942	74.4827		48.9447	61.7061	65.513		74.1764	74.3353	74.4591	60.5465	60.422	59.7728	59.9957	59.9421	54.9467	55.2145
TiO2		0.569		0.323		0.153	0.078	0.099	0.148	0.557	0.674		0.128	0.121	0.184	0.043	0.028		3.634	1.176	0.571		0.311	0.315	0.311	1.099	1.101	1.117	1.124	1.119	2.267	2.282
Al2O3		4.783		14.396		13.983	14.832	15.926	12.548	16	17.654		14.817	14.313	14.788	12.837	14.155		10.316	18.274	11.305		13.708	13.991	13.73	17.769	17.77	17.72	17.826	17.753	13.479	13.547
Fe2O3		10.824		1.934		1.376	0.684	0.665	0.818	3.718	1.855		0.908	0.91	1.496	1.117	0.15		14.552	9.17	2.672		1.933	2.004	1.944	7.161	7.168	7.236	7.276	7.254	13.484	13.56
MnO		0.166		0.026		-0.002	-0.014	0.004	-0.008	0.054	0.001		0.009	-0.003	0.033	0.16	0.032		0.195	0.15	0.046		0.036	0.038	0.036	0.095	0.096	0.095	0.094	0.094	0.187	0.188
MgO		18.832		0.731		0.24	0.085	0.115	0.21	1.417	1.279		0.119	0.178	0.209	-0.003	-0.01		8.625	2.792	2.323		0.324	0.299	0.301	1.522	1.542	1.545	1.587	1.584	3.424	3.431
CaO		11.96		3.329		2.162	3.924	0.641	4.015	4.243	4.804		1.195	3.106	1.515	0.971	0.288		9.934	3.11	8.956		1.274	1.274	1.283	4.976	4.99	4.928	4.96	4.946	6.948	7.006
Na2O		0.588		4.491		3.189	4.718	2.335	3.729	3.539	5.502		3.854	4.931	5.083	5.959	3.083		2.405	2.545	0.987		4.42	4.328	4.37	4.513	4.349	4.459	4.57	4.396	3.174	3.17
K2O		0.473		1.512		1.659	0.325	9.164	0.331	2.83	0.885		5.225	0.479	3.064	1.963	7.728		0.62	2.222	4.906		4.485	4.535	4.485	3.038	3.022	3.016	3.048	3.038	1.726	1.73
P2O5		0.188		0.129		0.067	0.027	0.079	0.017	0.156	0.2		0.024	0.023	0.015	0.005	0.005		0.272	0.038	0.223		0.042	0.043	0.039	0.491	0.489	0.489	0.49	0.489	0.355	0.357
LOI (%)		0.777426		0.48		0.88	0.49	0.54	0.24	0.92	0.394081		0.44	0.61	0.40935	0.226114	0.31		0.363117	0.572139	0.792912
TOTAL		100.884		100.464		101.085	100.845	99.3716	101.202	100.796	100.369		100.5	101.491	101.507	100.672	100.252		99.8608	101.755	98.2949		100.709	101.162	100.958	101.211	100.949	100.378	100.971	100.615	99.9907	100.486
Li	9.59811	11.3167				8.27419	5.189	6.63115			9.93139			7.63607	16.1906	3.72992	0.950493				3.20908				65.8767	10.9456
Sc	41.1188	39.1996				2.46351	1.15836	1.2163			3.31321			1.97929	2.23574	3.78814	1.92308				7.70183				5.08967	12.5446
Ti	3603.16	3297.42				1292.56	956.897	1171.45			3690.88			1118.59	1440.97	157.648	715.89				3418.18				2036.29	6184.75
V	153.678	145.669				7.46772	5.31513	5.92021			27.4398			8.70376	5.16197	1.40098	2.78707				38.6604				12.6278	120.302
Cr	1104.58	1030.61				5.73395	4.18736	5.14207			50.3642			12.3963	8.01629	3.56568	2.88479				49.927				4.42999	11.1284
Co	64.4348	71.2994				2.69585	1.44101	1.56307			8.68309			2.35351	2.10506	1.73578	1.7037				9.29294				2.81027	15.4553
Ni	309.387	357.848				5.35887	3.39691	2.7634			45.1152			6.77095	4.61798	1.93481	2.42569				30.9997				3.92846	16.2638
Cu	71.1584	116.069				10.7052	11.1757	6.39851			21.3314			6.48803	6.75825	25.281	14.2712				12.8586				14.7628	57.1421
Zn	118.259	115.505				13.797	14.0672	14.9991			32.9566			15.629	26.9506	17.3302	31.1987				266.836				34.9471	86.4047
Ga	7.81197	7.68325				11.3404	20.9937	17.4796			21.3245			15.3143	20.415	26.2487	31.7784				14.4004				16.0825	21.0285
Rb	15.8496	17.3891				45.3628	8.75309	202.475			49.2478			17.4032	93.1312	70.8582	291.113				156.8				150.345	68.7762
Sr	102.256	92.6604				464.944	386.447	707.337			995.858			602.754	267.227	72.2109	157.12				436.235				103.09	671.895
Y	12.4637	11.3448				5.34873	0.714261	3.92977			10.3823			9.44783	2.7028	124.487	40.6703				15.5837				23.1501	19.8635
Zr	37.2159	36.3574				46.3358	42.0482	17.0379			76.3286			117.055	63.3381	180.786	56.242				110.836				221.589	230.348
Nb	7.64833	6.9058				3.16269	2.27452	5.4156			23.5931			6.93738	58.8271	315.071	104.811				44.8588				9.24067	14.7365
Cs	0.501736	0.568593				0.462615	0.217139	1.06387			1.95718			0.246792	0.404401	0.344609	1.27407				1.00683				9.49121	1.19759
Ba	86.5671	95.7785				2114.77	64.6925	3268.2			296.243			236.783	619.421	52.8505	272.934				1462.01				869.461	1266.84
La	17.5316	14.4794				30.2291	9.54866	5.80326			385.557			9.6207	4.96179	4.44599	5.37429				36.9022				22.9054	37.851
Ce	39.1031	34.2062				55.3946	14.029	10.4811			663.276			15.8251	8.15949	11.5165	13.4232				78.8708				44.6812	67.5589
Pr	5.29062	4.71842				6.08625	1.35984	1.17443			64.6149			1.63311	0.857603	1.60202	1.8641				8.86556				5.14863	8.20043
Nd	22.2546	19.9035				21.4814	4.3741	4.72605			203.316			5.50624	3.02256	7.15775	7.64038				32.1829				19.2484	31.7528
Sm	4.32826	3.87051				3.74265	0.705254	1.09			20.6637			1.06592	0.605186	3.08781	2.41886				5.17837				3.92627	5.70061
Eu	1.13358	1.00284				2.11317	0.870498	1.6768			2.5239			1.51373	0.764851	0.228055	0.154308				1.32005				0.661994	1.60743
Gd	3.58572	3.24035				2.74554	0.456951	0.968611			11.2954			0.971304	0.447125	5.68562	3.2808				4.18464				3.66584	4.76438
Tb	0.494569	0.446666				0.323615	0.044729	0.130571			0.908185			0.179337	0.059935	1.60875	0.776306				0.550577				0.605127	0.673123
Dy	2.49534	2.29596				1.31663	0.203709	0.673631			2.73942			1.25357	0.411762	13.646	4.97172				2.78382				3.54965	3.4262
Ho	0.458407	0.408462				0.19742	0.028523	0.118951			0.394427			0.286707	0.097081	3.19381	0.928655				0.549541				0.759738	0.64718
Er	1.22767	1.09594				0.479584	0.101793	0.337941			1.15479			0.929192	0.364438	10.9658	2.41706				1.7017				2.24493	1.76125
Tm	0.169218	0.151778				0.062004	0.014184	0.051373			0.103859			0.165566	0.071366	2.02413	0.394632				0.276366				0.376529	0.258327
Yb	0.980596	0.90175				0.364739	0.087304	0.315719			0.558329			1.12941	0.549605	14.432	2.48354				1.82461				2.4521	1.58419
Lu	0.140486	0.130006				0.056751	0.016456	0.046742			0.07548			0.174773	0.101182	2.1674	0.333988				0.294804				0.382007	0.236132
Hf	1.42402	1.36841				1.37615	1.52854	0.460744			1.71893			3.36692	2.20188	9.03804	4.73311				2.899				5.99287	5.06739
Ta	0.381288	0.346391				0.237724	0.07991	0.318			0.906334			0.808569	2.7332	12.9144	12.2918				2.55312				0.991668	0.871873
Pb	10.7374	11.2868				33.1525	21.8499	38.4163			15.5106			34.257	48.2856	32.7071	58.6917				191.729				24.5711	36.8259
Th	2.0622	2.28848				12.1675	1.44166	0.596427			56.5436			2.29172	9.54027	6.41641	17.5879				6.40361				15.0085	6.24377
U	0.587487	0.525255				2.15144	1.00229	0.450172			2.26065			1.73961	2.0145	1.94997	8.56716				1.94608				5.74967	1.88312
Sr/Y	8.2043	8.16766				86.926	541.045	179.995			95.9187			63.7982	98.8705	0.580069	3.86327
La/Yb	17.8785	16.057				82.8786	109.373	18.3811			690.554			8.51834	9.02792	0.308064	2.16396
Gd/Yb	3.65667	3.5934				7.52741	5.23402	3.06795			20.2308			0.860009	0.813539	0.393959	1.32102
La/Gd	4.88927	4.46848				11.0102	20.8965	5.99132			34.1339			9.90494	11.0971	0.78197	1.6381

## Sheet: Table S3 Zrn U-Pb
Table S3. Zircon U-Pb data
			From calculated 235U										*calculated	*calculated
Grain name	206Pb/238U	2 s error	*207Pb/235U	2 s error	207Pb/206Pb	2 s error	(error corr.)	207/206 Age	Percent 7/6	Percent 7/5	204Pb/206Pb	204 cps	*207Pb/235U	*2s error (%)	206Pb/238U	2s error (%)	RHO	207Pb/206Pb	2s error (%)
							RHO	(Ga)	Discordance	Discordance							(error corr.)
MC13ST-1-08	92.4666	1.90505	94.9974	3.32875	231.5	69.9802	0.565138	0.2315	60.0576	2.664	0.00622618	47.7127	0.0980797	3.67354	0.0144477	2.07522	0.565138	0.0508006	3.03065
MC13ST-1-09	93.1944	1.90496	94.7459	2.85422	207	55.5039	0.652298	0.207	54.9786	1.63761	0.00404554	45.7855	0.0978078	3.15745	0.0145623	2.05904	0.652298	0.0502614	2.39323
MC13ST-1-03	93.2229	1.59683	97.4987	4.82553	275.5	112.272	0.332379	0.2755	66.1623	4.38545	0.00620086	45.704	0.100788	5.19693	0.0145667	1.72544	0.332379	0.051777	4.90147
MC13ST-1-01	94.1833	1.5968	97.6942	3.50013	256.5	77.0128	0.454354	0.2565	63.2814	3.59372	0.00690679	47.1751	0.101	3.76111	0.0147179	1.70793	0.454354	0.0513529	3.35048
MC13ST-1-04	97.5025	1.19406	98.0769	2.38626	185	52.0705	0.483334	0.185	47.2959	0.585602	0.00738182	39.9623	0.101415	2.55395	0.0152405	1.23398	0.483334	0.0497958	2.23582
MC13ST-1-07	98.7318	1.82734	100.118	2.26939	206	34.3505	0.783248	0.206	52.0719	1.38423	0.00209927	43.1251	0.103631	2.38164	0.0154342	1.86515	0.783248	0.0502455	1.48069
MC13ST-1-02	98.7889	2.32809	101.181	4.19373	230.5	84.4019	0.545082	0.2305	57.1415	2.36394	0.00888573	45.4493	0.104787	4.35924	0.0154431	2.37495	0.545082	0.0507765	3.65471
MC13ST-1-05	102.167	1.7886	102.076	2.51032	173.5	44.1184	0.68239	0.1735	41.1139	-0.0900137	0.00443097	37.8578	0.105761	2.58657	0.0159755	1.76468	0.68239	0.0495408	1.89075
MC13ST-1-06	260.285	3.98971	274.845	4.5412	470	23.4036	0.828545	0.47	44.6202	5.29774	0.000870239	45.1051	0.310876	1.88809	0.0412043	1.56422	0.828545	0.0564591	1.05718
MC13ST-2-17	92.8432	6.38661	114.386	10.6748	656.5	151.345	0.700992	0.6565	85.8578	18.8333	0.00122355	178.856	0.11925	9.89385	0.014507	6.93029	0.700992	0.0615014	7.05599
MC13ST-2-10	98.7449	2.02644	97.3129	1.96914	135.5	11.2706	0.974156	0.1355	27.1255	-1.47155	0.000409934	38.2141	0.100587	2.12306	0.0154362	2.06812	0.974156	0.0487533	0.479545
MC13ST-2-02core	99.1914	2.41897	97.106	2.58478	120	31.2503	0.880091	0.12	17.3405	-2.14751	0.00130375	59.2672	0.100363	2.79291	0.0155066	2.45773	0.880091	0.048424	1.32609
MC13ST-2-02rim	99.2851	2.22257	98.6311	2.34776	156	25.1679	0.90276	0.156	36.3557	-0.663114	0.000953389	32.5838	0.102017	2.49928	0.0155213	2.25605	0.90276	0.0491752	1.07505
MC13ST-2-24	99.4298	2.22261	98.75	2.27853	155.5	20.8596	0.929932	0.1555	36.058	-0.688347	0.000952463	43.9932	0.102146	2.42276	0.0155441	2.25284	0.929932	0.0491653	0.890927
MC13ST-2-15	99.743	2.61589	96.4636	2.51008	90	16.1081	0.968501	0.09	-10.8256	-3.39967	0.000606002	25.4794	0.0996665	2.72935	0.0155935	2.64324	0.968501	0.0478202	0.679634
MC13ST-2-21	100.182	3.01037	97.1475	3.18141	97	38.4277	0.881395	0.097	-3.28057	-3.12376	0.00119931	42.7179	0.100408	3.43669	0.0156627	3.02866	0.881395	0.0479629	1.62342
MC13ST-2-04	100.227	2.41921	98.7608	2.35128	137	13.5069	0.973194	0.137	26.8417	-1.48441	0.000608335	37.5279	0.102157	2.49989	0.0156697	2.43277	0.973194	0.0487769	0.574945
MC13ST-2-25	100.244	3.20791	99.3508	3.17709	151	21.997	0.960173	0.151	33.6132	-0.899077	0.000696796	37.1984	0.102798	3.35949	0.0156724	3.22545	0.960173	0.0490742	0.938666
MC13ST-2-16	100.558	2.41928	98.0048	2.37493	110	18.1212	0.953397	0.11	8.58406	-2.6047	0.000789328	40.2877	0.101337	2.5436	0.0157218	2.42491	0.953397	0.0482248	0.767447
MC13ST-2-20	100.946	2.22309	97.5861	2.1589	90.5	16.1033	0.956194	0.0905	-11.542	-3.44254	0.000505211	28.1314	0.100883	2.32156	0.0157829	2.21974	0.956194	0.0478227	0.679598
MC13ST-2-14	100.992	2.02735	99.5584	2.19647	138.5	26.5282	0.873208	0.1385	27.0819	-1.43952	0.00119363	34.8935	0.103024	2.31739	0.0157902	2.02337	0.873208	0.048815	1.12938
MC13ST-2-23	101.701	3.20786	99.1711	3.05979	112.5	14.7972	0.981108	0.1125	9.59949	-2.55063	0.000410277	26.2365	0.102603	3.24094	0.0159019	3.17956	0.981108	0.0482741	0.626989
MC13ST-2-26	101.769	3.60326	101.157	3.50019	160	16.5168	0.98099	0.16	36.3946	-0.604623	0.000587585	45.396	0.104762	3.63852	0.0159126	3.56916	0.98099	0.0492566	0.706078
MC13ST-2-18	102.084	3.01042	100.491	2.99614	136	23.2889	0.948683	0.136	24.9386	-1.5845	0.00113516	45.1151	0.104037	3.13378	0.0159623	2.97273	0.948683	0.048764	0.990992
MC13ST-2-01	102.586	2.61634	99.5691	2.50904	102	14.8897	0.971291	0.102	-0.574981	-3.03041	0.000588055	37.2988	0.103035	2.6471	0.0160415	2.57098	0.971291	0.0480556	0.629732
MC13ST-2-19	104.905	1.79559	104.741	1.99475	174	23.8268	0.860635	0.174	39.7101	-0.15599	0.000627534	44.6946	0.108668	2.00536	0.016407	1.72573	0.860635	0.049554	1.02117
MC13ST-2-06	108.401	3.79992	108.529	3.78335	184	23.6828	0.961051	0.184	41.0862	0.117705	0.000148139	41.5062	0.112812	3.67907	0.0169585	3.5355	0.961051	0.0497706	1.01679
MC13ST-2-07	125.271	1.09989	124.579	1.12582	184	8.60622	0.923055	0.184	31.9177	-0.555819	0.000196881	115.154	0.130543	0.96054	0.0196234	0.886605	0.923055	0.0497717	0.369489
MC13ST-2-11	131.769	1.1453	131.612	1.1984	201.5	9.6258	0.904265	0.2015	34.6062	-0.118677	0.000203627	137.499	0.138401	0.971128	0.0206516	0.878126	0.904265	0.0501408	0.414645
MC13ST-2fine-41	89.9189	1.86356	90.2852	1.94599	173.5	19.8342	0.926149	0.1735	48.1736	0.40579	0.000847573	50.9525	0.0929953	2.25371	0.0140469	2.08713	0.926149	0.0495418	0.850004
MC13ST-2fine-33	92.3782	2.22763	94.8205	2.44745	229.5	27.4933	0.89798	0.2295	59.748	2.57567	0.00182984	66.0473	0.0978884	2.70517	0.0144338	2.42895	0.89798	0.0507504	1.19037
MC13ST-2fine-24	95.2944	2.7747	95.3511	2.90643	170	29.5873	0.918055	0.17	43.9445	0.0595058	0.00148163	61.8343	0.0984623	3.19579	0.0148928	2.93361	0.918055	0.0494746	1.26698
MC13ST-2fine-21	96.7428	2.95717	96.3257	3.04453	159.5	28.6872	0.929102	0.1595	39.3462	-0.432996	0.00150126	67.611	0.0995173	3.31545	0.0151209	3.08008	0.929102	0.0492505	1.22613
MC13ST-2fine-23	96.7892	3.13983	95.7812	3.23889	144.5	32.2483	0.921831	0.1445	33.0178	-1.05243	0.00207218	79.2168	0.0989277	3.54638	0.0151282	3.2688	0.921831	0.0489351	1.37455
MC13ST-2fine-25	97.088	3.50539	98.5481	3.52372	207	21.541	0.96893	0.207	53.0976	1.48159	0.00175598	70.7067	0.101926	3.75522	0.0151753	3.63828	0.96893	0.0502621	0.928796
MC13ST-2fine-07	97.6271	4.05419	99.2844	4.35438	212	44.697	0.908204	0.212	53.9495	1.66924	0.000970374	65.8799	0.102726	4.60863	0.0152602	4.18491	0.908204	0.0503745	1.92884
MC13ST-2fine-16	97.7421	3.32242	97.8396	3.28945	173.5	19.8342	0.970574	0.1735	43.6645	0.0996478	0.00119517	64.8724	0.101158	3.52953	0.0152783	3.42545	0.970574	0.0495467	0.849921
MC13ST-2fine-15	99.9005	3.13941	99.0727	3.04555	153	14.6796	0.980981	0.153	34.7056	-0.835543	0.0007634	76.0981	0.102496	3.22889	0.0156183	3.16733	0.980981	0.0491093	0.626734
MC13ST-2fine-37	103.915	1.66973	106.759	1.75133	243	13.9196	0.93698	0.243	57.2367	2.66415	0.000520589	104.772	0.110874	1.72896	0.0162509	1.61992	0.93698	0.0510552	0.60407
MC13ST-2fine-18	93.9401	0.68286	99.1116	0.813831	297	10.3791	0.849472	0.297	68.3703	5.21787	0.000533678	179.193	0.102538	0.862027	0.0146796	0.732239	0.849472	0.0522709	0.454835
MC13ST-2fine-42	122.73	11.8965	131.153	12.3331	357.5	51.5224	0.973896	0.3575	65.6698	6.42185	0.000979537	64.4472	0.137886	10.0545	0.0192216	9.79033	0.973896	0.0536812	2.28234
MC13ST-2fine-31	207.484	45.0788	247.193	56.5718	710	295.617	0.846894	0.71	70.7769	16.0639	-0.000330714	-38.7609	0.275656	26.147	0.0327106	22.1166	0.846894	0.063062	13.904
MC13ST-2fine-08	164.094	23.6225	215.996	30.5101	892.5	124.68	0.924098	0.8925	81.6141	24.029	0.000278492	80.593	0.237056	15.7994	0.0257827	14.5931	0.924098	0.0688037	6.03782
Detrital zircons
MC13ST-2fine-49	566.38	76.6663	642.165	66.8856	918.5	35.5313	0.992662	0.9185	38.3365	11.8016	0.00221644	58.1121	0.882251	14.2883	0.0918379	14.1817	0.992662	0.0696737	1.72774
MC13ST-2fine-09	824.296	60.6407	971.707	48.7466	1321.5	13.8998	0.995857	1.3215	37.6242	15.1703	0.00036312	91.101	1.60396	7.8886	0.136409	7.8555	0.995857	0.0852806	0.717336
MC13ST-2fine-46	843.135	55.5845	1020.6	45.0399	1423.5	11.59	0.996316	1.4235	40.7703	17.3886	0.000738296	76.4673	1.73243	7.07469	0.139735	7.04832	0.996316	0.0899189	0.606673
MC13ST-2fine-29	733.207	31.6751	893.018	27.151	1312.5	9.37038	0.994476	1.3125	44.1366	17.8957	0.000223142	75.7812	1.40978	4.60163	0.120463	4.57604	0.994476	0.0848777	0.483017
MC13ST-2fine-34	530.026	65.1398	658.566	63.5824	1127.5	71.4615	0.963123	1.1275	52.991	19.5181	0.000441889	76.568	0.912903	13.3295	0.0856979	12.8345	0.963123	0.0772597	3.58644
MC13ST-2fine-17	606.391	66.0701	760.976	61.9951	1246.5	52.3843	0.973767	1.2465	51.3525	20.314	0.000186961	82.2087	1.11591	11.7561	0.0986361	11.4454	0.973767	0.0820525	2.67506
MC13ST-2fine-54	611.655	22.1205	776.839	20.5741	1286.5	6.50407	0.996146	1.2865	52.4559	21.2637	0.00028925	86.5338	1.14923	3.80882	0.0995335	3.79405	0.996146	0.0837405	0.334075
MC13ST-2fine-10	935.885	45.1831	1195.52	37.0314	1701	20.9497	0.976874	1.701	44.9803	21.7176	0.000168332	107.145	2.24615	5.31934	0.156252	5.19589	0.976874	0.104259	1.13737
MC13ST-2fine-55	719.799	38.3777	927.176	34.4663	1459	17.4442	0.987042	1.459	50.6649	22.3665	0.000651389	180.336	1.49222	5.71781	0.118135	5.64334	0.987042	0.0916121	0.917501
MC13ST-2fine-22	896.169	51.9105	1189.33	44.005	1770	23.4927	0.97926	1.77	49.369	24.6495	0.000100048	63.5771	2.22642	6.34924	0.14915	6.21697	0.97926	0.108264	1.2864
MC13ST-2fine-53	792.501	52.7326	1055.13	46.2371	1647.5	14.1831	0.994227	1.6475	51.8968	24.8903	0.000327928	91.9465	1.82693	7.12736	0.130817	7.08582	0.994227	0.101288	0.764749
MC13ST-2fine-48	853.11	76.6155	1151.08	65.5814	1765.5	20.0743	0.993539	1.7655	51.6788	25.886	0.00020687	99.6319	2.10712	9.67996	0.1415	9.61665	0.993539	0.108002	1.09856
MC13ST-2fine-52	733.181	21.7473	993.537	21.6555	1623.5	25.8899	0.91427	1.6235	54.8395	26.2049	0.000223653	53.865	1.66055	3.43556	0.120459	3.14068	0.91427	0.0999798	1.39177
MC13ST-2fine-30	328.446	81.2864	449.209	91.7854	1126.5	89.3602	0.984854	1.1265	70.8437	26.8835	0.000482551	91.1396	0.556478	25.865	0.0522722	25.4648	0.984854	0.0772104	4.48467
MC13ST-2fine-59	444.172	22.6589	613.906	24.8497	1302.5	24.0427	0.973657	1.3025	65.8985	27.6482	0.00052947	130.314	0.830586	5.42724	0.0713338	5.28379	0.973657	0.0844477	1.2375
MC13ST-2fine-56	655.281	48.8143	913.422	47.4572	1602.5	25.8187	0.984812	1.6025	59.1088	28.2609	0.000506142	76.5858	1.45869	7.97113	0.107	7.84926	0.984812	0.098873	1.38397
MC13ST-2fine-27	543.643	18.925	774.78	21.1377	1515	27.8114	0.926659	1.515	64.116	29.8326	0.00019035	106.274	1.14487	3.92063	0.0879937	3.63267	0.926659	0.0943636	1.47378
MC13ST-2fine-36	490.161	27.6735	714.199	30.2275	1501.5	16.9694	0.98851	1.5015	67.3552	31.3691	0.00027785	71.6351	1.02064	5.93809	0.0790043	5.86947	0.98851	0.0936959	0.89758
MC13ST-2fine-39	328.262	15.9795	486.256	19.7809	1322	23.7401	0.971213	1.322	75.1693	32.492	0.000515738	82.6745	0.61432	5.14457	0.0522421	4.99602	0.971213	0.0852849	1.22551
MC13ST-2fine-14	597.281	27.2407	886.711	28.3384	1700	12.1092	0.990679	1.7	64.8658	32.6408	0.000128569	85.4562	1.39485	4.8256	0.0970845	4.78039	0.990679	0.104202	0.657328
MC13ST-2fine-45	302.204	47.9742	470.391	66.0493	1405	138.969	0.913462	1.405	78.4908	35.7547	0.000312802	199.073	0.589292	17.8326	0.0479973	16.2801	0.913462	0.0890456	7.25653
MC13ST-2fine-02	521.481	22.4069	1058.5	29.6473	2435	13.0778	0.985459	2.435	78.5839	50.7342	0.000306581	139.049	1.83636	4.54313	0.0842596	4.47681	0.985459	0.158065	0.771945
MC13ST-2fine-57	251.998	69.7689	541.437	122.665	2072.5	180.81	0.94021	2.0725	87.8409	53.4575	0.000505081	115.674	0.704483	30.1315	0.0398667	28.3075	0.94021	0.128162	10.2626
MC13ST-2fine-11	407.832	45.4607	916.984	72.0423	2486	64.4956	0.949091	2.486	83.5948	55.5246	0.000377634	136.369	1.46733	12.1452	0.0653112	11.5236	0.949091	0.162944	3.82578
MC13ST-2fine-12	1300.21	29.2015	1369.52	19.4847	1479	14.8894	0.953461	1.479	12.0886	5.06108	0.000202158	28.7103	2.85296	2.60417	0.223483	2.48282	0.953461	0.0925871	0.785203
MC13ST-2fine-04	1581.91	72.9106	1689.07	42.4945	1824.5	4.35168	0.998943	1.8245	13.2963	6.34421	0.000154009	78.0539	4.27807	5.218	0.278134	5.21239	0.998943	0.111556	0.239889
MC13ST-2fine-58	1521.05	48.7345	1629.39	29.1498	1772	6.01603	0.995846	1.772	14.1622	6.64959	9.68167e-05	70.6893	3.97682	3.6188	0.266124	3.60368	0.995846	0.10838	0.329512
MC13ST-2fine-60	1204.22	40.3372	1284.84	26.798	1422	7.83493	0.993844	1.422	15.3151	6.27471	0.000455984	82.438	2.54464	3.70091	0.205399	3.67802	0.993844	0.089852	0.410016
MC13ST-2fine-20	2278.63	69.5309	2503.59	33.566	2691.5	4.56541	0.997119	2.6915	15.3399	8.98571	0.000138114	83.0314	10.7727	3.64282	0.424019	3.63225	0.997119	0.184264	0.276315
MC13ST-2fine-01	1459.37	15.2139	1622.01	9.72704	1840	5.45623	0.96816	1.84	20.6866	10.0275	0.000149879	107.987	3.94077	1.204	0.254067	1.16564	0.96816	0.112495	0.301399
MC13ST-2fine-44	1381.57	28.8736	1540.36	18.4428	1765.5	4.47867	0.994486	1.7655	21.7464	10.309	7.54102e-05	96.6651	3.559	2.3374	0.239022	2.32447	0.994486	0.107991	0.245119
MC13ST-2fine-38	1384.36	18.5229	1560.69	12.1015	1808	5.89364	0.977068	1.808	23.4315	11.2984	0.000156985	66.1491	3.6512	1.52285	0.239559	1.48789	0.977068	0.110541	0.324253
MC13ST-2fine-35	1310.63	47.2641	1507.21	31.3568	1795.5	9.16379	0.992144	1.7955	27.0048	13.0429	0.000220374	110.812	3.41256	4.02431	0.225462	3.99255	0.992144	0.109776	0.503431
MC13ST-2fine-40	1182.87	46.6317	1396.66	33.264	1740	16.8766	0.978061	1.74	32.0191	15.3072	0.000104683	74.3223	2.95732	4.42009	0.201413	4.32283	0.978061	0.10649	0.920788
MC13ST-2fine-03	1203.99	55.7084	1425.82	38.6531	1774.5	6.00733	0.99791	1.7745	32.1502	15.558	0.000149249	108.436	3.07265	5.09425	0.205357	5.08349	0.99791	0.108518	0.329169
MC13ST-2fine-47	1191.95	31.1835	1417.39	22.0184	1774.5	7.44044	0.990054	1.7745	32.8289	15.9052	0.000133164	64.8606	3.03896	2.89787	0.203107	2.86896	0.990054	0.108517	0.4077
MC13ST-2fine-50	1746.63	68.2914	2192.56	39.877	2640	4.51095	0.998163	2.64	33.8399	20.3384	0.000213525	75.058	7.66638	4.48366	0.311215	4.47534	0.998163	0.17866	0.271635
MC13ST-2fine-43	1141.26	59.3438	1371.52	43.0703	1750.5	19.4927	0.982922	1.7505	34.8038	16.7886	0.00014644	105.243	2.86055	5.78607	0.193683	5.6868	0.982922	0.107116	1.06478
MC13ST-2fine-51	1103.76	58.1201	1349.49	42.8137	1763.5	14.305	0.990838	1.7635	37.4109	18.2091	0.000416719	75.2908	2.77769	5.79567	0.186759	5.74225	0.990838	0.10787	0.782742
MC13ST-2fine-05	1068.67	56.8592	1326.96	42.5689	1772.5	9.29744	0.996148	1.7725	39.7083	19.465	0.000165386	106.41	2.6948	5.8091	0.180317	5.78651	0.996148	0.10839	0.509368
MC13ST-2fine-06	1031.62	35.0645	1315.79	27.3134	1814.5	10.5131	0.987872	1.8145	43.1458	21.5968	0.000155231	80.0187	2.65435	3.72859	0.173552	3.68321	0.987872	0.110924	0.57893
MC13ST-2fine-19	1018.53	31.969	1298.92	26.2486	1798	21.9205	0.94251	1.798	43.3523	21.587	0.000133709	77.1173	2.59416	3.60503	0.171171	3.39746	0.94251	0.109917	1.20472
MC13ST-2fine-26	1393.06	97.3963	1971.7	66.8032	2648.5	4.6738	0.999349	2.6485	47.402	29.3473	0.000164409	88.642	5.97215	7.80887	0.241233	7.80363	0.999349	0.179553	0.281707
MC13ST-2fine-12	1691.36	171.1	2579.24	106.088	3376	19.241	0.994374	3.376	49.9006	34.4242	0.000135235	89.5553	11.6834	11.6444	0.30002	11.5779	0.994374	0.282433	1.23343
MC13ST-2fine-28	1023.48	39.8492	1589.96	36.7719	2451.5	31.872	0.913034	2.4515	58.2507	35.6284	0.000108389	126.803	3.78724	4.61965	0.172072	4.21726	0.913034	0.159629	1.88428
MC13ST-2fine-32	1032.61	46.1129	1630.7	39.5205	2520.5	14.4116	0.98466	2.5205	59.0315	36.6767	0.000766119	135.195	3.98322	4.91726	0.173733	4.84152	0.98466	0.166284	0.857998
MC13ST-5-02	74.0971	3.95568	76.1846	4.01668	218	24.9966	0.98038	0.218	66.0105	2.74011	0.000167696	562.334	0.077921	5.47799	0.011561	5.37007	0.98038	0.0505089	1.07979
MC13ST-5_01b	78.3275	1.40614	116.179	11.5673	1049.5	209.857	0.171711	1.0495	92.5367	32.5803	0.00180973	4078.92	0.121228	10.567	0.0122251	1.80623	0.171711	0.0743122	10.4101
MC13ST-5_02b	78.8104	1.49208	146.195	7.66735	1515	100.184	0.338044	1.515	94.798	46.0924	0.00403213	4221.67	0.15487	5.64187	0.0123009	1.90495	0.338044	0.0943494	5.30974
MC13ST-5_09b	83.9234	3.51898	102.147	5.73958	622	89.3455	0.71396	0.622	86.5075	17.8403	0.00152277	362.194	0.105839	5.9147	0.0131042	4.22102	0.71396	0.0605264	4.14139
MC13ST-5_06b	85.122	1.7455	153.378	21.9218	1465.5	291.463	0.134478	1.4655	94.1916	44.5018	0.00323167	1185.55	0.163069	15.4828	0.0132925	2.0643	0.134478	0.0919328	15.3422
MC13ST-5_11b	86.1635	4.60395	298.348	56.5829	2744	353.91	0.244001	2.744	96.8599	71.1198	0.00634349	5328.56	0.341573	22.1959	0.0134563	5.38002	0.244001	0.190225	21.5251
MC13ST-5_05b	86.1974	3.70048	216.689	37.4844	2130.5	330.647	0.224351	2.1305	95.9541	60.2207	0.00372591	2623.42	0.237901	19.3886	0.0134616	4.32242	0.224351	0.132436	18.8944
MC13ST-5_04b	88.1424	4.06214	155.011	33.8946	1420.5	445.511	0.196945	1.4205	93.795	43.1381	0.00269599	880.022	0.164941	23.7754	0.0137674	4.64092	0.196945	0.089781	23.3098
MC13ST-5_13b	89.2253	6.7811	257.595	74.041	2404.5	547.793	0.233368	2.4045	96.2892	65.3622	0.00354543	3431.73	0.288792	33.1439	0.0139378	7.65471	0.233368	0.155275	32.2288
MC13ST-5_14b	92.7119	2.63285	157.058	10.7597	1350	131.97	0.38635	1.35	93.1325	40.9696	0.00332457	3831.49	0.167292	7.41397	0.0144863	2.86058	0.38635	0.0865415	6.83829
MC13ST-5-01	99.9773	10.636	265.026	70.2693	2263.5	494.904	0.352062	2.2635	95.5831	62.2764	0.000399583	2544.31	0.298259	30.6522	0.0156304	10.7256	0.352062	0.142999	28.6898
MC13ST-5_10b	103.159	6.41384	400.96	56.7072	3016	259.774	0.362323	3.016	96.5796	74.272	0.0115589	11996.3	0.484244	17.36	0.0161318	6.26889	0.362323	0.224952	16.1804
MC13ST-5_17b	117.624	9.12089	517.208	70.9298	3307.5	250.726	0.44069	3.3075	96.4437	77.2579	0.0141087	6625.67	0.66429	17.8114	0.0184145	7.82799	0.44069	0.270337	15.9886
MC13ST-5_08b	132.489	10.553	610.291	57.8907	3456.5	154.209	0.629595	3.4565	96.167	78.2908	0.0211904	18026.1	0.82408	12.8021	0.0207657	8.0506	0.629595	0.297393	9.94625
MC13ST-5_07b	141.119	9.10356	554.134	35.5432	3157.5	83.7903	0.777435	3.1575	95.5307	74.5335	0.0171067	13889.7	0.725931	8.39619	0.0221331	6.52417	0.777435	0.245788	5.2809
MC13ST-5-03	191.334	11.4476	1117.58	61.1634	4238	101.094	0.66344	4.238	95.4853	82.8797	0.0401726	10436.4	2.00629	9.16384	0.0301265	6.07495	0.66344	0.499061	6.85666
MC13ST-5_03b	68.0482	5.87881	75.7978	6.54599	401	50.5866	0.967851	0.401	83.0304	10.224	0.000647992	473.872	0.0775104	8.97696	0.0106122	8.68684	0.967851	0.0547346	2.25791
MC13ST-5_15b	112.937	4.97126	181.396	12.0558	1267.5	112.55	0.610579	1.2675	91.0898	37.7399	0.00308982	2468.11	0.19561	7.2791	0.0176743	4.44133	0.610579	0.0829387	5.76472
MC13ST-5_16b	142.126	57.8224	642.548	250.014	3453.5	582.332	0.740562	3.4535	95.8846	77.8809	0.0054698	12741.9	0.882962	55.8812	0.0222929	41.2264	0.740562	0.296814	37.5519
Xenocrystic zircon
MC13ST-5-04	396.781	17.0673	417.449	15.9378	556	31.9992	0.949494	0.556	28.6364	4.95094	0.000367617	65.8644	0.508545	4.67471	0.0634865	4.43811	0.949494	0.0587137	1.46685
MC13ST-5-27	406.796	10.5945	415.858	9.4957	489.5	16.3859	0.963901	0.4895	16.8955	2.17891	0.000267482	31.2899	0.506182	2.78937	0.0651401	2.68852	0.963901	0.0569574	0.7427
MC13ST-5-26	407.965	7.86084	418.828	7.6271	502	22.0234	0.8934	0.502	18.7321	2.5938	0.000417725	30.6703	0.510596	2.22658	0.0653332	1.98906	0.8934	0.0572842	1.00032
MC13ST-5-22	412.011	8.37028	417.751	8.02086	473	23.254	0.894063	0.473	12.8941	1.374	0.00052827	19.9367	0.508993	2.34664	0.0660021	2.09786	0.894063	0.0565257	1.05115
MC13ST-5-21	413	7.0297	414.57	7.42686	446.5	28.8824	0.804158	0.4465	7.50281	0.378663	0.000989169	22.8527	0.504273	2.18601	0.0661656	1.75769	0.804158	0.0558631	1.2994
MC13ST-5-11	416.704	9.05159	431.104	14.0026	532	72.5043	0.561216	0.532	21.6721	3.34012	0.007805	15.3259	0.52897	4.00008	0.0667785	2.24394	0.561216	0.0580612	3.31074
MC13ST-5-07	418.551	11.4548	425.524	10.4083	486.5	22.2241	0.942084	0.4865	13.9669	1.63881	0.00116443	15.6539	0.520591	3.00193	0.0670841	2.82785	0.942084	0.0568812	1.00678
MC13ST-5-12	418.791	11.6276	433.616	13.266	536	53.5632	0.760893	0.536	21.8673	3.41874	0.0025466	14.4743	0.532757	3.77135	0.0671239	2.86892	0.760893	0.0581759	2.44714
MC13ST-5-15	425.921	12.6622	431.79	11.3875	486.5	23.0702	0.946765	0.4865	12.452	1.35924	0.000694203	14.4193	0.530004	3.24679	0.0683048	3.0737	0.946765	0.0568747	1.04523
MC13ST-5-20	429.661	11.9681	440.176	12.4041	518.5	42.9814	0.827104	0.5185	17.1338	2.38879	-0.0117348	19.6026	0.542692	3.48345	0.0689248	2.88068	0.827104	0.0577125	1.95787
MC13ST-5-13	430.43	10.5912	441.956	11.9861	525.5	47.9211	0.758672	0.5255	18.0914	2.60806	0.00105033	18.5204	0.5454	3.3549	0.0690523	2.54473	0.758672	0.0578933	2.18563
MC13ST-5-23	431.969	12.8311	430.205	11.285	444	21.9165	0.952217	0.444	2.70962	-0.410017	0.000465541	19.3651	0.527617	3.22698	0.0693077	3.07255	0.952217	0.0557994	0.985594
MC13ST-5-08	433.736	14.2169	442.286	13.8685	510	41.4848	0.873865	0.51	14.9536	1.93303	0.00642496	10.1271	0.545902	3.88126	0.0696008	3.39116	0.873865	0.0574899	1.88694
MC13ST-5-16	435.984	15.7798	440.634	14.0107	488	26.4568	0.95241	0.488	10.659	1.0552	0.00108317	15.5011	0.543388	3.93293	0.0699738	3.74541	0.95241	0.0569201	1.19883
MC13ST-5-14	439.196	19.6148	448.973	17.9244	522.5	39.4605	0.931964	0.5225	15.9434	2.17761	0.000764672	12.4669	0.556116	4.9617	0.0705071	4.62347	0.931964	0.0578129	1.79887
MC13ST-5-10	441.126	16.9917	449.236	15.555	514	35.387	0.927237	0.514	14.1779	1.80542	0.000533268	9.38815	0.556521	4.3013	0.0708276	3.98782	0.927237	0.057593	1.61073
MC13ST-5-17	452.106	14.5443	452.714	13.1616	479	30.9235	0.922068	0.479	5.61457	0.134333	0.0113729	15.4803	0.561862	3.61512	0.0726532	3.33301	0.922068	0.0566847	1.39916
MC13ST-5-25	454.251	16.9703	460.126	15.2483	512.5	32.0052	0.935984	0.5125	11.3657	1.2768	0.000247674	22.3111	0.573304	4.13688	0.0730102	3.87161	0.935984	0.0575563	1.45636
MC13ST-5_12COREb	462.295	6.02283	462.109	5.4447	484.5	12.7411	0.919566	0.4845	4.58307	-0.0402134	0.000379952	90.2521	0.57638	1.46859	0.07435	1.3504	0.919566	0.0568224	0.57706
MC13ST-5_12RIMb	476.762	6.35631	465.21	5.34462	432	8.40146	0.964811	0.432	-10.3617	-2.48332	0.000105557	78.9161	0.581202	1.43397	0.0767639	1.38347	0.964811	0.0554959	0.377054
MC13ST-5-18	497.744	28.1623	500.504	23.5238	536	24.0541	0.983014	0.536	7.13729	0.551477	0.000590078	32.6077	0.637133	5.98787	0.0802744	5.88568	0.983014	0.0581761	1.09896
MC13ST-5-05	373.127	17.994	397.934	16.4411	567.5	14.9351	0.990597	0.5675	34.2507	6.23396	0.000481542	104.787	0.479827	5.01427	0.0595912	4.96686	0.990597	0.0590193	0.686022
MC13ST-5-19	415.902	8.03514	446.967	9.14951	633	33.6933	0.786944	0.633	34.2967	6.95015	0.000964664	37.4182	0.553045	2.53625	0.0666457	1.9956	0.786944	0.0608247	1.56493
MC13ST-5-24	418.524	13.1885	443.366	12.0264	597	17.7236	0.969862	0.597	29.8954	5.60288	0.000497114	37.1714	0.547546	3.35766	0.0670797	3.25626	0.969862	0.0598303	0.818107
MC13ST-5-06	455.484	13.8494	421.225	11.7432	262	30.2679	0.922543	0.262	-73.849	-8.13323	-0.000383477	-4.37424	0.514166	3.41589	0.0732155	3.15098	0.922543	0.0514744	1.31817
MC13ST-17-02	94.801	3.02076	93.7896	3.55073	141.5	54.6765	0.809452	0.1415	33.0028	-1.07835	0.00209371	58.3783	0.0967743	3.96686	0.0148152	3.21029	0.809452	0.0488718	2.32928
MC13ST-17-07	97.9422	3.21895	95.6491	4.50569	112.5	86.5227	0.670521	0.1125	12.9403	-2.39741	0.0076514	51.1297	0.0987848	4.9415	0.0153098	3.31202	0.670521	0.0482753	3.66605
MC13ST-17-09	98.0908	3.02097	100.651	3.74047	234	54.7518	0.794526	0.234	58.0809	2.54354	0.00647027	58.1413	0.104211	3.90713	0.0153332	3.10362	0.794526	0.0508494	2.37252
MC13ST-17-10	98.0937	3.21895	97.6694	3.34176	160.5	32.7608	0.920833	0.1605	38.8824	-0.434466	0.00281165	66.1962	0.100973	3.59166	0.0153336	3.30695	0.920833	0.049268	1.40059
MC13ST-17-05	98.2517	3.41711	96.787	3.44169	134	30.0634	0.939437	0.134	26.6779	-1.51327	0.00268882	53.2049	0.100017	3.73129	0.0153585	3.50495	0.939437	0.0487223	1.27879
MC13ST-17-08	98.2956	2.62578	98.0442	3.00413	165	41.1391	0.837002	0.165	40.4269	-0.256372	0.00303741	53.7387	0.10138	3.21675	0.0153654	2.692	0.837002	0.049364	1.76021
MC13ST-17-25	98.5234	3.41709	99.2852	4.41162	190	72.0068	0.74882	0.19	48.1456	0.767232	0.0105574	46.0377	0.102727	4.66924	0.0154013	3.49534	0.74882	0.0499033	3.09465
MC13ST-17-19	98.5736	3.021	97.8546	3.4286	153.5	46.7751	0.839794	0.1535	35.7827	-0.734739	0.00382003	42.4105	0.101174	3.67842	0.0154092	3.08857	0.839794	0.0491239	1.99704
MC13ST-17-20	98.9548	3.02103	100.623	3.22441	212.5	31.7562	0.913497	0.2125	53.433	1.65799	0.0035073	38.4384	0.104181	3.36852	0.0154693	3.07679	0.913497	0.0503874	1.37047
MC13ST-17-04	98.9687	3.21896	97.5197	3.36998	135.5	36.482	0.903799	0.1355	26.9604	-1.48577	0.00255961	57.0866	0.100811	3.62731	0.0154715	3.27794	0.903799	0.0487507	1.55233
MC13ST-17-24	99.0947	3.61533	100.065	4.14009	196	53.9426	0.845645	0.196	49.4415	0.970036	0.00541193	44.5229	0.103574	4.34905	0.0154913	3.67699	0.845645	0.0500228	2.32129
MC13ST-17-23	99.1619	3.61533	101.279	4.46528	223.5	65.3966	0.79255	0.2235	55.6322	2.08985	0.0065066	59.7147	0.104894	4.63755	0.0155019	3.67451	0.79255	0.0506254	2.82802
MC13ST-17-12	99.9058	2.82347	98.1029	2.97413	128	33.4035	0.895045	0.128	21.9486	-1.83778	0.00376451	62.6885	0.101443	3.18279	0.0156191	2.8484	0.895045	0.0485928	1.41945
MC13ST-17-27	100.123	3.41702	99.3983	3.58358	155	37.1223	0.908219	0.155	35.4046	-0.729001	0.0035835	55.7735	0.10285	3.78797	0.0156533	3.43985	0.908219	0.0491587	1.58525
MC13ST-17-18	100.373	3.81353	102.615	5.51198	227	96.1302	0.677493	0.227	55.783	2.18511	0.00540324	44.0655	0.106349	5.6552	0.0156927	3.8296	0.677493	0.0507039	4.15956
MC13ST-17-26	101.26	3.21899	105.721	7.70655	279	159.991	0.417204	0.279	63.706	4.21918	0.0195713	54.3139	0.109739	7.6902	0.0158325	3.20436	0.417204	0.0518577	6.98896
MC13ST-17-30	101.652	3.219	101.003	3.48317	159	40.2235	0.880455	0.159	36.0682	-0.642647	0.00233152	39.1697	0.104594	3.62608	0.0158942	3.19213	0.880455	0.0492346	1.71923
MC13ST-17-21	103.517	3.21906	104.092	3.73123	190	48.8956	0.830675	0.19	45.5172	0.5526	0.00329438	51.7599	0.10796	3.77488	0.0161883	3.13511	0.830675	0.0498962	2.1017
MC13ST-17-22	104.675	4.40788	102.562	4.9853	127	67.17	0.830054	0.127	17.579	-2.06018	0.00692655	49.3843	0.106291	5.11669	0.0163707	4.24604	0.830054	0.0485773	2.85349
MC13ST-17-11	98.0334	3.02096	95.4885	3.03255	106	28.39	0.932651	0.106	7.51569	-2.66507	0.00161351	39.6258	0.098611	3.32999	0.0153241	3.10542	0.932651	0.0481453	1.20139
MC13ST-17-16	99.8777	3.61525	97.5374	3.79864	114.5	43.5051	0.892488	0.1145	12.7706	-2.39943	0.00396489	46.7655	0.10083	4.08843	0.0156147	3.64831	0.892488	0.0483127	1.84417
MC13ST-17-17	100.817	3.41699	98.5988	3.37096	119	26.0198	0.951567	0.119	15.2802	-2.24928	0.00230752	43.7795	0.101982	3.59053	0.0157626	3.41634	0.951567	0.0484058	1.10388
MC13ST-17-13	101.184	3.02121	98.4416	3.02261	106.5	27.2956	0.933587	0.1065	4.9916	-2.78572	0.00138989	49.1383	0.101811	3.22411	0.0158205	3.00971	0.933587	0.0481481	1.15536
MC13ST-17-29	101.654	3.41696	98.7943	3.42791	104	31.6966	0.929856	0.104	2.25537	-2.895	0.00150639	35.1939	0.102194	3.64436	0.0158946	3.38837	0.929856	0.0481036	1.34084
MC13ST-17-28	103.284	3.21905	100.434	3.23038	107	29.4605	0.929493	0.107	3.47257	-2.83762	0.00194569	56.166	0.103976	3.3808	0.0161516	3.14212	0.929493	0.0481639	1.24697
MC13ST-17-06	98.8203	3.41708	112.237	5.96138	476	97.4284	0.620568	0.476	79.2394	11.9536	0.00261426	86.3426	0.116883	5.61866	0.0154481	3.48491	0.620568	0.0566084	4.40588
MC13ST-17-03	107.268	6.59224	113.312	7.44216	313	71.6576	0.891599	0.313	65.7292	5.33409	0.00648097	64.1998	0.118066	6.9539	0.0167797	6.19845	0.891599	0.0526439	3.1489
MC13ST-17-15	106.912	6.99026	209.232	51.0761	1667.5	490.826	0.243051	1.6675	93.5885	48.9025	0.00450645	231.8	0.228843	27.3554	0.0167236	6.59446	0.243051	0.102379	26.5351
MC14ST-1-18	154.092	4.20561	142.769	5.15169	29.5	65.0456	0.713481	0.0295	-422.344	-7.93048	-0.00705517	-270.604	0.15098	3.87295	0.0241922	2.76249	0.713481	0.0466165	2.71368
MC14ST-1-13	159.372	2.47606	147.926	3.91564	39	56.7769	0.55266	0.039	-308.647	-7.73787	0.000683826	-299.463	0.15684	2.84728	0.0250316	1.57307	0.55266	0.0468022	2.37294
MC14ST-1-10	117.983	1.13989	110.265	2.03029	17.5	40.4066	0.501686	0.0175	-574.19	-6.99958	-0.00144257	-214.752	0.114716	1.94405	0.0184713	0.975057	0.501686	0.0463902	1.6817
MC14ST-1-20	157.335	1.89294	148.664	1.80311	82.5	11.081	0.933755	0.0825	-90.7092	-5.83286	0.000110691	107.58	0.157681	1.30442	0.0247077	1.21796	0.933755	0.0476699	0.466868
MC14ST-1-34	161.522	1.78998	153.452	1.7156	100.5	10.388	0.931235	0.1005	-60.718	-5.2586	9.16288e-05	92.6168	0.163154	1.20513	0.0253734	1.12222	0.931235	0.0480303	0.43917
MC14ST-1-26	108.733	1.89563	103.323	2.25178	51	35.1449	0.766771	0.051	-113.202	-5.23565	-0.000723594	-255.068	0.107121	2.29339	0.0170108	1.75825	0.766771	0.0470379	1.47217
MC14ST-1-24out	150.529	1.7823	143.222	2.60256	94	36.4187	0.614596	0.094	-60.1377	-5.10219	0.00143088	-122.973	0.151493	1.94958	0.0236264	1.19798	0.614596	0.0478952	1.53791
MC14ST-1-22	165.791	3.5124	158.266	3.21594	117	10.9768	0.977276	0.117	-41.7018	-4.75501	0.000333618	162.324	0.168681	2.19621	0.0260528	2.14622	0.977276	0.0483626	0.465533
MC14ST-1-33	150.997	2.29535	144.297	2.21318	105.5	13.8593	0.934384	0.1055	-43.1254	-4.64322	0.00043285	27.9718	0.152713	1.64623	0.0237007	1.53814	0.934384	0.0481296	0.5865
MC14ST-1-35	162.294	2.81961	155.903	2.61101	129.5	9.75843	0.97332	0.1295	-25.3234	-4.09929	0.000214397	59.0031	0.165965	1.80779	0.0254962	1.75951	0.97332	0.0486224	0.414802
MC14ST-1-43	143.06	2.4545	137.542	2.37222	113	14.8233	0.940283	0.113	-26.6019	-4.01237	0.000452585	58.2632	0.145069	1.84526	0.022441	1.73498	0.940283	0.0482868	0.628118
MC14ST-1-19out	157.126	2.30457	151.085	2.67961	127	28.2756	0.777439	0.127	-23.7211	-3.99803	0.000453854	40.592	0.160446	1.91006	0.0246744	1.48479	0.777439	0.0485711	1.20135
MC14ST-1-42	158.256	1.75109	152.315	1.75729	130.5	12.6658	0.901283	0.1305	-21.2687	-3.90026	0.000241135	88.5161	0.161852	1.24296	0.024854	1.12021	0.901283	0.0486427	0.538488
MC14ST-1-08	155.125	2.1346	149.344	1.98827	128	7.86374	0.972409	0.128	-21.1913	-3.87047	0.000414149	39.7807	0.158457	1.43235	0.0243564	1.39279	0.972409	0.0485956	0.334143
MC14ST-1-46	161.695	1.3689	155.795	1.42366	136.5	11.4447	0.869467	0.1365	-18.4578	-3.7868	0.00038761	78.8791	0.165841	0.986047	0.025401	0.857299	0.869467	0.0487684	0.487099
MC14ST-1-21	126.647	1.3315	122.067	2.09965	103.5	35.1325	0.581424	0.1035	-22.3645	-3.75181	-0.00150096	5.68625	0.12775	1.82649	0.0198411	1.06176	0.581424	0.0480942	1.48603
MC14ST-1-45	149.147	1.25981	144.04	1.42049	130.5	14.6766	0.807612	0.1305	-14.2891	-3.54557	0.000270878	117.318	0.152421	1.05815	0.023407	0.854527	0.807612	0.0486405	0.624008
MC14ST-1-09	147.847	1.46193	142.846	1.60172	130	15.6996	0.83187	0.13	-13.7283	-3.50078	-0.000162508	38.2534	0.151067	1.20249	0.0232005	1.00025	0.83187	0.0486372	0.667346
MC14ST-1-06	131.711	6.33992	127.294	5.84159	115.5	11.773	0.994776	0.1155	-14.0355	-3.47017	0.000219549	49.6451	0.13357	4.88977	0.0206425	4.86405	0.994776	0.0483329	0.499151
MC14ST-1-37	156.483	1.5299	151.308	1.54961	140.5	11.4199	0.897464	0.1405	-11.3759	-3.42033	0.000687351	36.3167	0.1607	1.10277	0.0245723	0.989653	0.897464	0.0488503	0.486418
MC14ST-1-39	131.891	0.936271	127.607	1.02764	118.5	11.0656	0.836713	0.1185	-11.3002	-3.35707	0.000260015	78.0319	0.133919	0.857196	0.020671	0.717197	0.836713	0.0483927	0.469437
MC14ST-1-24in	156.722	2.13731	151.638	2.41281	142.5	23.8342	0.805529	0.1425	-9.9807	-3.35308	0.000554862	57.6654	0.161077	1.71396	0.0246103	1.38051	0.805529	0.0488893	1.01562
MC14ST-1-25	125.537	3.31087	121.583	3.1223	114.5	13.7897	0.976762	0.1145	-9.63964	-3.2521	0.000175781	39.9639	0.127212	2.72695	0.0196655	2.66347	0.976762	0.0483194	0.584461
MC14ST-1-27	157.898	1.95887	153.074	1.96314	148.5	13.529	0.908667	0.1485	-6.32837	-3.15103	0.00012651	62.0128	0.162721	1.38225	0.0247971	1.25594	0.908667	0.0490161	0.577118
MC14ST-1-11	123.738	4.19748	120.051	4.045	117.5	24.191	0.957956	0.1175	-5.30874	-3.07082	0.000534848	59.2731	0.125512	3.57608	0.0193809	3.42545	0.957956	0.0483739	1.02603
MC14ST-1-03out	142.901	2.28378	138.651	2.28613	136	16.6669	0.915697	0.136	-5.07396	-3.06479	0.000529299	88.7876	0.146321	1.76497	0.0224157	1.61609	0.915697	0.0487586	0.70929
MC14ST-1-32	160.52	1.26877	155.748	1.35645	153	11.5361	0.851684	0.153	-4.91532	-3.06438	0.000249566	78.9654	0.165786	0.939748	0.0252142	0.800333	0.851684	0.0491136	0.492481
MC14ST-1-01	113.538	1.78247	113.683	2.71331	185.5	45.7686	0.627555	0.1855	38.7937	0.127914	0.001905	100.138	0.118475	2.52453	0.0177691	1.58391	0.627555	0.0498034	1.96553
MC14ST-1-30	130.882	4.7326	130.209	5.25292	187	52.9322	0.849017	0.187	30.0096	-0.516866	0.000324716	71.9396	0.136829	4.30399	0.0205113	3.65343	0.849017	0.0498291	2.27408
MC14ST-1-28	133.644	1.66706	131.003	2.16615	152.5	28.8887	0.71487	0.1525	12.3648	-2.01577	0.000481188	93.8557	0.137718	1.76342	0.0209485	1.26045	0.71487	0.0491061	1.23308
MC14ST-1-02out	136.489	1.32584	134.101	1.84766	161	25.6366	0.667273	0.161	15.2242	-1.78116	0.000864162	109.544	0.141195	1.47148	0.0213993	0.981759	0.667273	0.0492851	1.09598
MC14ST-1-14	139.741	2.10996	137.522	2.13659	168.5	15.3571	0.918433	0.1685	17.0674	-1.61401	0.00134506	296.981	0.145047	1.66211	0.0219148	1.52645	0.918433	0.0494388	0.657491
MC14ST-1-40	144.873	3.49803	141.73	3.34378	158.5	15.4454	0.965369	0.1585	8.59728	-2.21798	0.000345249	101.61	0.149802	2.52984	0.0227286	2.44211	0.965369	0.0492313	0.66001
MC14ST-1-04	152.883	1.96569	152.23	3.05376	210.5	40.0117	0.60202	0.2105	27.3716	-0.428601	0.00148811	75.6412	0.161755	2.16178	0.0240002	1.30115	0.60202	0.0503431	1.72614
MC14ST-1-02in	155.289	1.46657	150.938	3.21221	152.5	48.7976	0.417197	0.1525	-1.82875	-2.8822	0.00211098	86.3096	0.160278	2.29208	0.0243825	0.95589	0.417197	0.0491012	2.08308
MC14ST-1-03in	156.335	1.87478	162.082	5.95032	314	86.1755	0.305449	0.314	50.2117	3.5458	0.00825832	88.2885	0.173082	3.97782	0.0245487	1.2139	0.305449	0.0526648	3.78771
MC14ST-1-05	154.156	2.30006	149.657	2.29351	148.5	15.534	0.91572	0.1485	-3.80852	-3.0057	0.000382693	54.8666	0.158815	1.64915	0.0242024	1.51008	0.91572	0.049015	0.662659
MC14ST-1-12	156.231	1.87457	154.788	2.9848	201.5	39.2133	0.583891	0.2015	22.4663	-0.931976	0.00129385	89.1777	0.164685	2.08057	0.0245321	1.21456	0.583891	0.0501437	1.68907
MC14ST-1-15	158.78	4.03179	164.061	7.47125	308.5	96.0509	0.520678	0.3085	48.5317	3.21903	0.00249665	98.9207	0.17537	4.94086	0.0249373	2.57104	0.520678	0.0525295	4.21828
MC14ST-1-17	156.263	1.85851	164.114	2.7293	346	30.3326	0.668094	0.346	54.8374	4.78428	0.00445442	314.866	0.175432	1.80228	0.0245372	1.20391	0.668094	0.053405	1.34104
MC14ST-1-31	155.115	2.13458	154.371	3.52457	211.5	47.0766	0.565602	0.2115	26.6594	-0.482401	0.000873996	40.1832	0.164206	2.46328	0.0243549	1.39286	0.565602	0.0503618	2.03142
MC14ST-1-36	156.313	1.22796	153.105	1.77008	172.5	22.3911	0.638244	0.1725	9.38351	-2.09575	0.000980238	58.5254	0.162756	1.24602	0.0245453	0.795178	0.638244	0.0495297	0.959232
MC14ST-1-44	157.79	1.71852	153.192	2.16972	152	24.7366	0.722278	0.152	-3.80935	-3.00142	0.00105987	81.427	0.162856	1.52669	0.02478	1.10257	0.722278	0.0490907	1.05586
MC14ST-1-29	163.542	1.46023	161.724	3.75489	204	54.4251	0.359891	0.204	19.8322	-1.12436	0.000236273	99.5699	0.172669	2.51393	0.0256949	0.904299	0.359891	0.0501954	2.34548
MC14ST-1-19in	165.651	1.94209	160.814	2.23368	159.5	21.5366	0.790388	0.1595	-3.85634	-3.00751	0.000959398	88.3108	0.171618	1.50271	0.0260304	1.18762	0.790388	0.049247	0.920567
MC14ST-1-07	169.421	3.51523	171.345	4.12216	266	35.7492	0.803486	0.266	36.3079	1.12285	0.00325523	291.656	0.183833	2.61713	0.0266307	2.10252	0.803486	0.051563	1.55804
MC14ST-1-16	161.488	4.20848	181.065	17.7171	510	228.58	0.246747	0.51	68.3357	10.8125	0.0286982	-4.39014	0.195221	10.7301	0.025368	2.63928	0.246747	0.0574827	10.3983
MC14ST-1-38	179.845	8.27416	203.612	10.2383	553	66.0566	0.839049	0.553	67.4783	11.6729	0.0018275	217.246	0.22206	5.56339	0.0282922	4.6667	0.839049	0.0586274	3.0268
MC14ST-1-23	367.95	45.1031	417.398	44.2355	763	70.1153	0.967054	0.763	51.7759	11.8468	0.000294551	43.621	0.508469	13.0669	0.0587406	12.6332	0.967054	0.0646582	3.32645
MC14ST-1-41	1194.9	12.8252	1158.01	9.02321	1148	11.4064	0.898696	1.148	-4.08564	-3.18605	0.000783662	70.1495	2.1284	1.30914	0.203658	1.17647	0.898696	0.0780637	0.574155
MC14ST-8-14	103.647	2.66076	97.1008	3.11873	15	51.8862	0.76804	0.015	-590.977	-6.7412	0.00316892	-170.372	0.100357	3.37046	0.0162086	2.58811	0.76804	0.046342	2.15845
MC14ST-8-01out	106.61	0.831801	102.426	0.887424	81	10.9059	0.863585	0.081	-31.6167	-4.084	0.000549466	287.758	0.106144	0.911037	0.0166759	0.786726	0.863585	0.047641	0.459348
MC14ST-8-05	102.4	1.39208	98.517	2.06543	80.5	40.8889	0.622736	0.0805	-27.2048	-3.94131	0.00266105	67.8777	0.101893	2.201	0.0160121	1.37036	0.622736	0.0476287	1.72213
MC14ST-8-01in	105.377	1.04922	101.581	1.25738	88.5	19.6207	0.771589	0.0885	-19.0704	-3.73706	0.00275909	351.741	0.105223	1.30116	0.0164815	1.00388	0.771589	0.0477847	0.827695
MC14ST-8-10	105.139	1.49542	101.874	1.56016	101	17.3153	0.890653	0.101	-4.09831	-3.20521	0.000671655	276.618	0.105542	1.61019	0.016444	1.43403	0.890653	0.0480389	0.732129
MC14ST-8-03	105.483	0.8911	102.284	1.01138	103	14.0959	0.819265	0.103	-2.41104	-3.12756	0.0014616	331.748	0.105989	1.03969	0.0164983	0.851737	0.819265	0.0480836	0.596175
MC14ST-8-28	85.8174	0.764383	84.363	1.51904	118	38.877	0.477806	0.118	27.2734	-1.72399	0.00645999	331.587	0.0866386	1.87714	0.0134019	0.896677	0.477806	0.0483862	1.649
MC14ST-8-31	86.5172	0.893635	86.8717	1.41226	170.5	31.3035	0.612943	0.1705	49.2568	0.408041	0.00432769	275.301	0.0893268	1.69682	0.0135119	1.03988	0.612943	0.0494813	1.3407
MC14ST-8-21in	94.2024	1.55464	92.0911	1.70889	112.5	23.6766	0.856199	0.1125	16.2645	-2.29264	0.00121688	127.849	0.094941	1.94189	0.0147209	1.6625	0.856199	0.0482718	1.00327
MC14ST-8-22	97.0275	1.18621	94.6076	1.21854	108.5	13.0051	0.912962	0.1085	10.5737	-2.55779	0.000957854	206.505	0.0976583	1.34933	0.0151657	1.23183	0.912962	0.0481971	0.550589
MC14ST-8-38	97.2095	1.23636	94.7302	1.4727	107.5	23.7471	0.78683	0.1075	9.5726	-2.61721	0.00182004	228.756	0.0977907	1.62887	0.0151944	1.28152	0.78683	0.0481714	1.00529
MC14ST-8-45	97.7867	0.862625	95.347	1.12946	109.5	20.4612	0.716091	0.1095	10.6971	-2.55879	0.00182853	211.118	0.0984578	1.24142	0.0152853	0.888887	0.716091	0.0482116	0.866519
MC14ST-8-44	98.0268	0.638529	96.7519	0.84073	139.5	14.8423	0.720374	0.1395	29.7299	-1.31774	0.00142123	222.706	0.0999788	0.911203	0.0153231	0.656364	0.720374	0.0488355	0.631997
MC14ST-8-40	98.0979	1.00684	100.146	1.2893	222.5	20.1494	0.764809	0.2225	55.9111	2.04473	0.00273315	226.71	0.103662	1.35239	0.0153343	1.03423	0.764809	0.0505974	0.871289
MC14ST-8-32	98.3177	0.847847	97.1286	0.949306	142	12.7638	0.847738	0.142	30.7622	-1.22419	0.00163602	296.178	0.100387	1.0251	0.0153689	0.868977	0.847738	0.0488887	0.543731
MC14ST-8-25	98.5449	1.20448	96.6463	1.31738	124.5	17.0806	0.861698	0.1245	20.8475	-1.96441	0.00250118	313.309	0.0998645	1.42946	0.0154047	1.23169	0.861698	0.0485213	0.725341
MC14ST-8-47	98.869	1.0079	97.8529	1.19372	147.5	17.9012	0.802631	0.1475	32.9702	-1.03839	0.00164696	180.367	0.101172	1.28001	0.0154558	1.02731	0.802631	0.0489943	0.763497
MC14ST-8-29	98.9918	0.654768	97.2052	0.943449	128	18.1065	0.654809	0.128	22.6627	-1.83792	0.00269281	337.393	0.10047	1.01801	0.0154751	0.666545	0.654809	0.0485934	0.769408
MC14ST-8-23	99.1727	0.787626	97.8247	1.32539	139.5	27.5875	0.56306	0.1395	28.9084	-1.37806	0.00315395	318.041	0.101142	1.42165	0.0155036	0.800346	0.56306	0.0488283	1.17487
MC14ST-8-27in	99.2217	0.992233	98.1759	1.75551	147	37.1247	0.537086	0.147	32.5023	-1.06522	0.00451048	309.154	0.101523	1.87678	0.0155113	1.00777	0.537086	0.0489879	1.58312
MC14ST-8-39	99.386	0.713206	98.2958	0.872177	146	13.7567	0.776701	0.146	31.9274	-1.10918	0.00133638	335.625	0.101653	0.931142	0.0155372	0.723178	0.776701	0.0489689	0.586499
MC14ST-8-26	99.8661	0.91326	98.0857	1.07011	129.5	15.9762	0.805068	0.1295	22.8833	-1.8152	0.00203804	307.15	0.101425	1.14484	0.0156129	0.921619	0.805068	0.0486224	0.679102
MC14ST-8-30	100.583	1.39041	99.696	1.39809	152.5	11.1857	0.945997	0.1525	34.0443	-0.889176	0.000872395	409.506	0.103173	1.47283	0.0157257	1.39324	0.945997	0.0491055	0.477454
MC14ST-8-17	99.7849	3.704	101.95	8.59061	226	185.956	0.422153	0.226	55.8474	2.12413	-0.0064787	-256.888	0.105625	8.87515	0.0156001	3.74132	0.422153	0.0506776	8.04554
MC14ST-8-21out	100.847	1.09183	99.8265	1.24167	149.5	16.8342	0.835338	0.1495	32.5435	-1.0227	0.00126931	314.037	0.103315	1.30637	0.0157675	1.09119	0.835338	0.0490428	0.718159
MC14ST-8-24	101.097	1.25709	98.7327	1.36307	116.5	17.1602	0.864832	0.1165	13.2217	-2.39436	0.00213629	372.974	0.102127	1.44926	0.0158068	1.25329	0.864832	0.0483584	0.727617
MC14ST-8-42	101.323	1.32404	99.2067	1.32963	123	11.6708	0.935976	0.123	17.6237	-2.13301	0.00107027	261.754	0.102642	1.40727	0.0158424	1.31712	0.935976	0.0484928	0.495448
MC14ST-8-36	101.342	0.688393	102.549	0.898405	204	14.3042	0.743209	0.204	50.3225	1.17706	0.00292421	477.792	0.106277	0.921261	0.0158454	0.684648	0.743209	0.0502009	0.616378
MC14ST-8-27out	101.641	0.732526	99.5061	0.862122	123	12.9	0.798524	0.123	17.3648	-2.14573	0.0020223	317.242	0.102967	0.909743	0.0158926	0.726415	0.798524	0.0484928	0.547631
MC14ST-8-11	102.213	0.964518	103.708	1.93623	211.5	39.841	0.484206	0.2115	51.6721	1.44142	0.00251068	303.989	0.107541	1.96491	0.0159828	0.951168	0.484206	0.0503614	1.7192
MC14ST-8-43	102.684	0.949333	100.808	1.0159	131	11.8221	0.880153	0.131	21.6152	-1.86133	0.00119385	248.202	0.104382	1.05888	0.0160569	0.931935	0.880153	0.048656	0.502638
MC14ST-8-33	103.262	1.49381	101.162	1.47205	126.5	10.8426	0.953566	0.1265	18.3701	-2.07591	0.000708672	277.547	0.104767	1.5294	0.016148	1.45833	0.953566	0.0485601	0.460632
MC14ST-8-37	103.409	0.998236	101.098	1.14279	121.5	16.0502	0.819239	0.1215	14.8901	-2.28517	0.00169328	256.037	0.104698	1.18792	0.0161711	0.973134	0.819239	0.0484587	0.681217
MC14ST-8-46	103.454	1.66332	106.405	1.77929	246	15.9147	0.919877	0.246	57.9456	2.77395	0.00132239	258.641	0.110487	1.76211	0.0161782	1.62083	0.919877	0.0511157	0.69111
MC14ST-8-19	104.136	0.935793	106.418	1.1277	231	15.0665	0.811456	0.231	54.9193	2.14432	0.00179716	585.301	0.110501	1.1165	0.0162859	0.905932	0.811456	0.0507844	0.652495
MC14ST-8-02	105.148	0.754402	106.117	2.05348	201.5	44.2548	0.354901	0.2015	47.8176	0.913761	0.00147369	314.687	0.110172	2.03902	0.0164453	0.723358	0.354901	0.0501422	1.90628
MC14ST-8-34	105.337	1.42837	103.174	1.44406	128	12.8639	0.928534	0.128	17.7057	-2.09653	0.000909372	332.932	0.106958	1.47248	0.0164751	1.36718	0.928534	0.0485914	0.546654
MC14ST-8-08	105.479	2.66112	108.221	9.89622	242	214.809	0.263929	0.242	56.4137	2.53394	0.0129716	301.394	0.112475	9.66398	0.0164975	2.54386	0.263929	0.0510282	9.32131
MC14ST-8-07	105.479	2.66112	108.244	9.89615	242.5	214.743	0.263983	0.2425	56.5036	2.55452	0.0129716	301.394	0.1125	9.66197	0.0164975	2.54386	0.263983	0.0510396	9.31924
MC14ST-8-12	105.956	2.31577	110.079	4.55158	272.5	86.4247	0.504829	0.2725	61.1172	3.74582	0.00204478	367.215	0.114512	4.36791	0.0165727	2.20382	0.504829	0.0517169	3.77047
MC14ST-8-16	107.025	2.66145	109.111	2.66848	228	14.1088	0.97161	0.228	53.0594	1.91209	0.00150291	651.189	0.11345	2.58112	0.0167413	2.50772	0.97161	0.0507212	0.610658
MC14ST-8-35	107.373	1.44702	106.285	1.52939	156	15.7337	0.896391	0.156	31.1711	-1.02423	0.000860001	270.601	0.110355	1.51615	0.0167963	1.35899	0.896391	0.0491759	0.672058
MC14ST-8-09	100.869	1.29017	110.431	4.30208	393	87.6688	0.313517	0.393	74.3337	8.65913	0.00560183	415.737	0.114899	4.11577	0.0157708	1.28916	0.313517	0.05453	3.90826
MC14ST-8-18	102.583	2.83395	117.198	5.25559	495	84.8969	0.586064	0.495	79.2762	12.471	0.00884877	489.785	0.122355	4.75429	0.0160409	2.78495	0.586064	0.0570907	3.85223
MC14ST-8-20	87.0144	1.0256	112.859	1.58687	766	18.8495	0.798506	0.766	88.6404	22.8997	0.00611524	349.568	0.117568	1.48625	0.0135901	1.18668	0.798506	0.0647502	0.894702
MC14ST-8-06	108.226	1.80266	166.404	10.4546	1165	131.145	0.246467	1.165	90.7102	34.9618	0.0130772	444.238	0.178086	6.82915	0.0169308	1.67978	0.246467	0.0787274	6.61848
MC14ST-8-41	230.299	9.83534	1300.69	37.2601	4340.5	39.804	0.848333	4.3405	94.6942	82.2941	0.0879995	375.239	2.60043	5.12785	0.0363721	4.34909	0.848333	0.53512	2.71501
MC14ST-8-13	170.156	9.5626	989.439	45.457	4123	67.0274	0.783708	4.123	95.873	82.8027	0.16358	363.474	1.64984	7.27178	0.0267478	5.6965	0.783708	0.461665	4.51671
MC14ST-12A-09	101.572	0.796521	96.5604	2.67855	49	66.8805	0.271839	0.049	-107.291	-5.19056	0.00308876	140.915	0.0997714	2.90987	0.0158817	0.790409	0.271839	0.0470016	2.8003
MC14ST-12A-21	102.012	1.21085	97.7426	1.55416	69	27.666	0.717185	0.069	-47.8434	-4.36796	0.00261998	243.757	0.101053	1.66845	0.015951	1.19644	0.717185	0.0473985	1.16272
MC14ST-12A-25out	102.909	0.882626	98.7356	1.65143	73.5	36.3282	0.492485	0.0735	-40.0123	-4.2269	0.00233552	174.391	0.10213	1.75593	0.0160924	0.86457	0.492485	0.0474829	1.52822
MC14ST-12A-20	103.376	0.865455	99.4567	1.80342	80.5	40.5309	0.443294	0.0805	-28.4169	-3.94036	0.00836323	329.674	0.102913	1.90437	0.0161659	0.843954	0.443294	0.0476293	1.70704
MC14ST-12A-12	104.812	0.558469	100.869	0.689521	83	11.3115	0.747975	0.083	-26.2792	-3.90894	0.000608698	254.221	0.104448	0.718221	0.0163923	0.537186	0.747975	0.047672	0.476703
MC14ST-12A-11	103.354	2.27024	99.5006	2.3278	82	25.2812	0.901205	0.082	-26.0414	-3.87269	0.000934501	157.99	0.102961	2.45739	0.0161625	2.21442	0.901205	0.0476614	1.06502
MC14ST-12A-13	102.785	0.762349	99.1325	0.967127	86	16.6039	0.730004	0.086	-19.5177	-3.68467	0.000908546	199.486	0.102561	1.02423	0.0160729	0.747642	0.730004	0.0477412	0.700005
MC14ST-12A-07	98.8101	0.813425	98.1968	1.99504	156.5	45.9848	0.389152	0.1565	36.8626	-0.624563	0.00264753	207.234	0.101545	2.13255	0.0154465	0.829573	0.389152	0.0491852	1.96445
MC14ST-12A-03	99.8982	0.882403	100.274	3.43058	182	81.1703	0.247815	0.182	45.1109	0.37493	0.00900576	226.919	0.103801	3.59596	0.0156179	0.890195	0.247815	0.0497261	3.48379
MC14ST-12A-27in	100.049	0.95141	100.252	2.84886	178	65.942	0.321126	0.178	43.7927	0.202155	0.0102019	233.781	0.103777	2.9864	0.0156417	0.958378	0.321126	0.0496389	2.82823
MC14ST-12A-25in	100.216	1.107	99.1722	2.39992	147.5	53.5657	0.438197	0.1475	32.057	-1.05249	-0.00313991	-43.9858	0.102604	2.54156	0.015668	1.11327	0.438197	0.0489955	2.28456
MC14ST-12A-24	100.455	1.4364	99.1633	2.11075	141.5	40.1067	0.644829	0.1415	29.0067	-1.30311	0.0026161	231.858	0.102594	2.23536	0.0157057	1.44114	0.644829	0.0488731	1.70854
MC14ST-12A-05	100.535	0.490033	97.8575	2.63069	107	65.6395	0.174302	0.107	6.04247	-2.7357	0.00778035	237.739	0.101177	2.82174	0.0157182	0.491247	0.174302	0.0481598	2.77854
MC14ST-12A-17in	100.598	0.968698	99.4143	2.08267	144.5	46.3223	0.441226	0.1445	30.3817	-1.19113	0.00458783	173.57	0.102867	2.2003	0.0157282	0.970505	0.441226	0.0489328	1.97454
MC14ST-12A-04	100.616	0.899689	100.519	1.86724	171	40.4233	0.461826	0.171	41.1604	-0.0957936	0.00533365	244.06	0.104068	1.95196	0.015731	0.901211	0.461826	0.0494956	1.73133
MC14ST-12A-01	100.789	0.865242	102.274	3.36922	209.5	77.7965	0.249893	0.2095	51.8907	1.45221	0.00522332	336.931	0.105978	3.46588	0.0157583	0.865227	0.249893	0.0503166	3.35592
MC14ST-12A-22	100.81	1.47108	98.5618	1.56329	118	18.3943	0.883429	0.118	14.568	-2.28077	0.00201203	224.836	0.101941	1.66498	0.0157615	1.47079	0.883429	0.0483901	0.78015
MC14ST-12A-19in	101.154	0.848058	100.485	1.96634	157.5	43.8767	0.411081	0.1575	35.7753	-0.665476	0.0025471	120.635	0.104031	2.05627	0.0158158	0.845006	0.411081	0.0492126	1.87449
MC14ST-12A-26	101.383	0.65952	99.4141	1.13295	126	23.5645	0.547993	0.126	19.5375	-1.98025	0.00181739	169.989	0.102867	1.19666	0.0158518	0.655671	0.547993	0.0485512	1.00099
MC14ST-12A-16	101.566	0.882524	100.302	1.39661	143.5	27.4931	0.598802	0.1435	29.2225	-1.26017	0.00335023	176.151	0.103831	1.46282	0.0158807	0.875813	0.598802	0.0489175	1.17157
MC14ST-12A-32	101.621	0.745056	100.127	1.43229	138	30.7328	0.491874	0.138	26.3616	-1.49196	0.0018795	172.191	0.103641	1.50269	0.0158894	0.738987	0.491874	0.0488013	1.30834
MC14ST-12A-17out	101.812	1.24551	99.0218	1.40142	106	19.5893	0.829913	0.106	3.95064	-2.81805	0.000637446	121.865	0.102441	1.48591	0.0159195	1.23308	0.829913	0.0481445	0.82898
MC14ST-12A-08	101.921	1.15891	99.7475	1.3918	121.5	21.5163	0.782147	0.1215	16.1144	-2.17905	0.001101	181.205	0.103229	1.46549	0.0159367	1.14613	0.782147	0.0484628	0.913136
MC14ST-12A-23	102.276	0.457208	100.559	1.12645	133.5	25.5579	0.38295	0.1335	23.3886	-1.70744	0.00439899	255.502	0.104111	1.17689	0.0159927	0.450596	0.38295	0.048706	1.08718
MC14ST-12A-31	102.943	0.899848	101.596	1.52216	143.5	30.6304	0.559541	0.1435	28.2624	-1.32577	0.0011038	150.111	0.10524	1.57504	0.0160978	0.881148	0.559541	0.0489123	1.3054
MC14ST-12A-19out	103.248	0.745278	100.243	0.960403	103	16.4368	0.723086	0.103	-0.240679	-2.99757	0.000559297	111.015	0.103768	1.00639	0.0161458	0.727651	0.723086	0.0480846	0.695168
MC14ST-12A-18	103.526	1.05514	101.823	1.82397	135.5	37.0935	0.545623	0.1355	23.5969	-1.67242	0.00152916	118.45	0.105487	1.88348	0.0161897	1.02745	0.545623	0.0487488	1.57841
MC14ST-12A-29	103.961	0.865506	101.604	1.19923	120	21.5357	0.676526	0.12	13.3657	-2.32003	0.00165663	166.771	0.105248	1.24071	0.0162582	0.839288	0.676526	0.0484333	0.913681
MC14ST-12A-06	104.347	2.96597	104.303	4.02011	176	67.0522	0.706144	0.176	40.7117	-0.0421357	0.00711678	235.343	0.108191	4.05962	0.0163191	2.8658	0.706144	0.0496017	2.87449
MC14ST-12A-27out	104.812	1.05516	102.506	1.58598	123	29.9542	0.623822	0.123	14.7869	-2.24988	0.000737305	180.454	0.10623	1.62726	0.0163924	1.01497	0.623822	0.0484853	1.27181
MC14ST-12A-02	109.257	3.6598	107.975	5.40619	153	95.1576	0.639614	0.153	28.5902	-1.18717	0.00446524	244.107	0.112205	5.28486	0.0170935	3.37866	0.639614	0.0491119	4.06245
MC14ST-12A-33	110.461	4.00707	112.817	4.6272	235	53.7516	0.843622	0.235	52.9951	2.0883	0.000591642	185.622	0.117522	4.33852	0.0172835	3.65931	0.843622	0.0508735	2.32951
MC14ST-12A-15out	103.286	2.27026	119.298	3.60668	520	50.8765	0.691082	0.52	80.1372	13.4215	0.00485011	688.556	0.124678	3.20718	0.0161519	2.21587	0.691082	0.0577525	2.31808
MC14ST-12A-28	227.871	69.9143	273.344	77.5022	749	216.248	0.950584	0.749	69.5766	16.6357	0.000685077	135.337	0.308938	32.9661	0.0359819	31.3118	0.950584	0.064238	10.235
MC14ST-12A-15in	103.1	0.524342	127.249	2.7369	672.5	47.7412	0.224042	0.6725	84.6691	18.9777	0.0118609	429.529	0.13352	2.28995	0.0161226	0.512663	0.224042	0.0619608	2.23174
MC14ST-25-17out	79.7137	1.79466	78.3771	1.89906	113	25.9735	0.899488	0.113	29.4569	-1.7053	0.00198464	180.663	0.0802512	2.51888	0.0124428	2.26549	0.899488	0.0482861	1.10061
MC14ST-25-08out	84.9287	3.07135	99.1993	5.72928	527	106.46	0.600067	0.527	83.8845	14.3857	0.00273254	-42.7309	0.102633	6.07082	0.0132622	3.64069	0.600067	0.0579377	4.85635
MC14ST-25-28out	86.3317	1.8928	82.1954	2.10475	40	35.8009	0.827736	0.04	-115.829	-5.03228	-0.000949334	-8.33798	0.0843213	2.66709	0.0134827	2.20735	0.827736	0.0468216	1.49655
MC14ST-25-31	86.5759	1.85598	81.7254	2.1095	19	38.4622	0.80311	0.019	-355.663	-5.93508	-0.00270667	-16.0508	0.0838195	2.68788	0.0135211	2.15834	0.80311	0.0464108	1.60152
MC14ST-25-20out	87.3047	1.34453	83.5092	1.35881	52.5	16.3673	0.91455	0.0525	-66.2946	-4.54495	0.000633457	84.547	0.0857253	1.69554	0.0136357	1.55057	0.91455	0.0470672	0.685801
MC14ST-25-22out	87.4382	2.13508	109.503	9.32501	688.5	184.776	0.273709	0.6885	87.3002	20.1496	0.0187552	335.935	0.11388	9.00391	0.0136567	2.45861	0.273709	0.0624291	8.66008
MC14ST-25-27	88.0169	0.942313	89.679	3.23868	208	83.9201	0.285731	0.208	57.6842	1.85347	0.0165313	26.6189	0.0923429	3.77626	0.0137477	1.07797	0.285731	0.0502876	3.61883
MC14ST-25-32out	88.3477	2.50901	95.5779	3.7491	352	66.8064	0.695358	0.352	74.9012	7.56468	0.00306241	245.857	0.0987077	4.11388	0.0137997	2.8597	0.695358	0.0535509	2.9565
MC14ST-25-35in	88.6551	1.38241	110.949	3.54461	688.5	63.7422	0.465384	0.6885	87.1234	20.0935	0.0182168	213.662	0.115467	3.3755	0.0138481	1.57015	0.465384	0.0624246	2.98768
MC14ST-25-02out	88.7561	0.749325	88.285	0.851517	150.5	12.6589	0.844014	0.1505	41.0259	-0.533644	0.00233826	394.563	0.0908442	1.00726	0.013864	0.850103	0.844014	0.0490565	0.540215
MC14ST-25-11out	89.2839	1.74777	86.8656	3.69088	96.5	94.0829	0.444543	0.0965	7.47781	-2.78392	0.00783865	71.9525	0.0893204	4.43733	0.013947	1.97126	0.444543	0.0479465	3.97478
MC14ST-25-34out	89.4667	1.72957	85.493	1.92235	52	31.2243	0.830051	0.052	-72.0514	-4.64797	0.00880731	21.4429	0.0878487	2.34565	0.0139757	1.94677	0.830051	0.0470595	1.30814
MC14ST-25-09out	89.7016	3.07239	84.0665	3.54615	3.5	65.7437	0.784316	0.0035	-2462.9	-6.7032	0.000454721	-70.5011	0.0863214	4.39915	0.0140127	3.44942	0.784316	0.0461194	2.72906
MC14ST-25-12	90.4931	1.47519	100.772	5.1261	422.5	113.628	0.307235	0.4225	78.5815	10.2	0.0066062	265.429	0.104343	5.35019	0.0141372	1.64173	0.307235	0.0552567	5.09143
MC14ST-25-16	90.9173	1.84137	93.3134	2.80504	228.5	55.4014	0.648046	0.2285	60.2113	2.56781	0.000996333	282.265	0.0962599	3.14847	0.0142039	2.03979	0.648046	0.0507369	2.39787
MC14ST-25-17in	91.1398	1.12006	121.23	2.4638	827.5	36.8597	0.573842	0.8275	88.9861	24.8208	0.0209725	588.553	0.12682	2.15738	0.0142389	1.23771	0.573842	0.0666802	1.76682
MC14ST-25-26	94.6089	0.956858	92.7435	1.3555	120	26.8944	0.666081	0.12	21.1592	-2.01131	0.00145759	64.5665	0.0956449	1.52983	0.0147849	1.01886	0.666081	0.0484317	1.14107
MC14ST-25-28in	95.1303	1.57159	89.9393	2.79534	30.5	66.8964	0.512327	0.0305	-211.902	-5.7716	-0.00630024	3.67574	0.092623	3.24995	0.014867	1.66436	0.512327	0.0466426	2.79102
MC14ST-25-21outest	99.8265	4.95698	140.31	15.3626	960	217.502	0.426132	0.96	89.6014	28.8529	0.0448155	206.468	0.148195	11.7675	0.0156066	5.00511	0.426132	0.0710906	10.6456
MC14ST-25-01	101.009	7.22428	110.04	9.00808	382	107.577	0.833249	0.382	73.5579	8.20722	0.000729767	102.067	0.11447	8.65698	0.0157929	7.21032	0.833249	0.0542643	4.78642
MC14ST-25-15	118.163	2.34356	125.184	3.23827	333	42.7995	0.727586	0.333	64.5157	5.60859	0.00554271	592.964	0.131216	2.75175	0.0184996	2.00175	0.727586	0.0531021	1.88774
MC14ST-25-06	1385.84	28.6228	1381.07	18.3457	1373.5	15.8671	0.941202	1.3735	-0.89877	-0.346072	-0.00711688	-38.3202	2.89702	2.44158	0.239845	2.29788	0.941202	0.0876031	0.824874
MC14ST-25-18	1610.38	22.1555	1623.53	13.0492	1640.5	8.08071	0.963026	1.6405	1.83603	0.809958	0.000171029	73.9426	3.94815	1.61593	0.283792	1.55613	0.963026	0.1009	0.435343
MC14ST-25-34in	1592.54	23.6194	1616.01	14.0647	1646.5	9.07301	0.959927	1.6465	3.27697	1.45226	0.000134386	79.1632	3.91166	1.7454	0.280245	1.6754	0.959927	0.101233	0.489151
MC14ST-25-10out	1563.77	50.2719	1611.88	29.3492	1675	8.93503	0.991237	1.675	6.64074	2.98498	7.2666e-05	5.13342	3.89171	3.65974	0.274542	3.62754	0.991237	0.102809	0.483446
MC14ST-25-14	1594.98	25.0522	1635.64	16.2892	1688	17.5129	0.881829	1.688	5.5105	2.48577	0.00246945	376.554	4.00753	2.01272	0.280729	1.77473	0.881829	0.103535	0.949137
MC14ST-25-03	2229.34	36.6176	2311.28	18.1123	2384.5	7.64573	0.974397	2.3845	6.50684	3.54495	0.000274666	42.0271	8.74133	1.99684	0.413174	1.94565	0.974397	0.153442	0.448957
MC14ST-25-04	2283.53	36.3806	2359.23	17.5167	2425	5.34882	0.986432	2.425	5.83395	3.20867	0.000743041	401.482	9.2124	1.92077	0.425102	1.89466	0.986432	0.157173	0.315329
MC14ST-25-02	2304.26	29.8616	2375.54	14.6393	2437	7.24646	0.963666	2.437	5.4467	3.00034	0.000318827	69.2943	9.37779	1.60134	0.429694	1.5431	0.963666	0.158285	0.427735
MC14ST-25-09in	2071.51	26.6208	2206.15	14.9072	2333.5	12.139	0.904573	2.3335	11.2275	6.10303	-0.000514104	-553.996	7.78314	1.66295	0.378992	1.50417	0.904573	0.148944	0.708945
MC14ST-25-24	2021.32	16.4995	2164.78	10.0248	2303.5	10.2418	0.847398	2.3035	12.2502	6.62736	-0.000167026	-101.168	7.43252	1.12295	0.368297	0.951537	0.847398	0.146365	0.59624
MC14ST-25-21in	1189.19	15.6882	1259.52	11.8021	1381.5	14.8881	0.881387	1.3815	13.9202	5.58371	0.00119504	82.035	2.45735	1.64017	0.202592	1.44554	0.881387	0.0879716	0.774808
MC14ST-25-29	1987.14	29.5294	2159.4	16.0906	2327.5	8.96972	0.957071	2.3275	14.6233	7.97719	0.000457672	1410.38	7.38794	1.80641	0.361062	1.7288	0.957071	0.148402	0.523596
MC14ST-25-23	2062.85	59.2863	2263.81	30.6134	2450.5	8.57294	0.988858	2.4505	15.8192	8.8771	-0.00100406	51.5291	8.29639	3.40413	0.377141	3.36607	0.988858	0.159545	0.506749
MC14ST-25-20in	1336.13	42.6431	1512.64	31.7745	1769	36.7485	0.869399	1.769	24.47	11.669	-0.00174877	-107.431	3.43618	4.07198	0.230319	3.53958	0.869399	0.108205	2.01201
MC14ST-25-10in	1739.85	94.1199	2021.91	54.0232	2323.5	13.4004	0.992131	2.3235	25.1195	13.9502	-0.00471731	-172.074	6.32561	6.24458	0.309837	6.19509	0.992131	0.14807	0.781829
MC14ST-25-21out	985.227	59.5778	1114.43	43.9834	1376	13.1466	0.994573	1.376	28.3992	11.594	0.000600384	124.009	1.99698	6.57207	0.165137	6.53608	0.994573	0.0877061	0.68377
MC14ST-25-21mid	897.108	10.2652	1049.82	10.3719	1382.5	19.4229	0.77163	1.3825	35.1097	14.5463	0.000129568	110.407	1.8122	1.58927	0.149318	1.22621	0.77163	0.0880224	1.01089
MC14ST-25-22in	684.277	13.7208	801.816	45.6431	1144	160.026	0.254552	1.144	40.1855	14.6591	0.0284307	208.4	1.20276	8.32619	0.111991	2.11458	0.254552	0.0778921	8.05192
MC14ST-25-32in	580.828	19.5521	814.832	24.1342	1522	47.5463	0.813151	1.522	61.8378	28.7181	-0.0102315	-102.468	1.23117	4.33333	0.0942879	3.52286	0.813151	0.0947026	2.52223
	Note: Bold analyses are those identified by the TuffZirc algorithm for calculation of the age. For samples MC13ST-5 and MC14ST-25, bold analyses are those defining the discordia line that yields a lower intercept age.

## Sheet: Table S4 Ttn U-Pb
Table S4. Titanite U-Pb and trace element data
Grain name	Duration(s)	Final207_235	Final207_235_Prop2SE	Final206_238	Final206_238_Prop2SE	ErrorCorrelation_6_38vs7_35	Final238_206	Final238_206_Prop2SE	Final207_206	Final207_206_Prop2SE	ErrorCorrelation_38_6vs7_6	FinalAge206_238	FinalAge206_238_Prop2SE	FinalAge207_206	FinalAge207_206_Prop2SE	FinalDiscPercent	FinalFracCommonPb	Final206_204	Approx_U_PPM	Approx_U_PPM_Int2SE	Approx_Th_PPM	Approx_Th_PPM_Int2SE	Approx_Pb_PPM	Approx_Pb_PPM_Int2SE	FInal_U_Th_Ratio	FInal_U_Th_Ratio_Int2SE		Zr_ppm_SQ_m91	Zr_ppm_SQ_m91_Int2SE	Zr_ppm_SQ_m91_LOD	Pb_ppm_SQ_m204	Pb_ppm_SQ_m204_Int2SE	Pb_ppm_SQ_m204_LOD	Pb_ppm_SQ_m206	Pb_ppm_SQ_m206_Int2SE	Pb_ppm_SQ_m206_LOD	Pb_ppm_SQ_m207	Pb_ppm_SQ_m207_Int2SE	Pb_ppm_SQ_m207_LOD	Pb_ppm_SQ_m208	Pb_ppm_SQ_m208_Int2SE	Pb_ppm_SQ_m208_LOD	Th_ppm_SQ_m232	Th_ppm_SQ_m232_Int2SE	Th_ppm_SQ_m232_LOD	U_ppm_SQ_m238	U_ppm_SQ_m238_Int2SE	U_ppm_SQ_m238_LOD
			abs 2 sigma error		abs 2 sigma error			abs 2 sigma error		abs 2 sigma error			abs 2 sigma error		abs 2 sigma error
MC13ST_4_1	26.029	0.331	0.083	0.01772	0.00052	0.32703	56.4334	1.65606	0.135	0.03	0.13909	113.2	3.3	2162	230	94.73	0.1148	8	55.72	0.99	25.7	0.67	1.7	0.18	2.177	0.084		228.1	3.5	0.096	Below LOD	Below LOD	2.2	4.9	0.12	0.015	0.788	0.035	0.01	0.848	0.088	0.039	34.67	0.9	0.0029	77.9	1.4	0.0008
MC13ST_4_10	26.027	2.57	0.74	0.038	0.0037	0.3905	26.3158	2.56233	0.45	0.1	-0.14964	240	23	3990	440	94.07	0.479	31	57.38	0.72	50.7	1	13.3	2.1	1.142	0.029		273	11	0.11	7.2	1.9	3.3	10.8	1	0.018	6.3	0.96	0.021	6.7	1	0.043	68.1	1.4	0.011	80.8	1	0.0017
MC13ST_4_11	19.272	0.313	0.079	0.01559	0.00049	-0.23928	64.1437	2.01606	0.1461	0.032	0.50811	99.7	3.1	2327	290	95.66	0.13	15	61.7	1.3	70.2	6.5	2.66	0.28	0.943	0.074		297	18	0.16	Below LOD	Below LOD	3.7	4.89	0.13	0.022	0.84	0.04	0.019	1.34	0.14	0.061	94.4	8.7	0.0039	87	1.8	0.0016
MC13ST_4_12	26.006	0.328	0.082	0.01749	0.00049	0.025166	57.1755	1.60183	0.1365	0.03	0.36465	111.8	3.1	2157	260	94.82	0.1168	16	61.8	1.1	91.8	2.9	3.48	0.27	0.68	0.013		267.5	8.1	0.16	Below LOD	Below LOD	4.7	5.384	0.099	0.029	0.867	0.036	0.024	1.76	0.14	0.065	123.4	3.9	0.0029	87.2	1.6	0.0026
MC13ST_4_13	18.628	0.318	0.08	0.01645	0.0005	0.065842	60.7903	1.84773	0.1391	0.03	0.35418	105.1	3.2	2236	220	95.27	0.1193	-11	68.6	1.3	222	16	5.46	0.43	0.322	0.019		674	46	0.14	Below LOD	Below LOD	3.6	5.53	0.12	0.022	0.911	0.04	0.018	2.76	0.22	0.048	299	21	0.015	96.8	1.9	0.0025
MC13ST_4_14	26.013	0.386	0.097	0.01613	0.00049	0.35808	61.9963	1.88333	0.1733	0.038	0.085717	103.1	3.1	2579	230	95.99	0.1645	10	62.8	1.5	321.5	7.1	8.25	0.46	0.1964	0.0034		1043	21	0.18	Below LOD	Below LOD	4	5.04	0.11	0.049	1.024	0.043	0.034	4.17	0.23	0.074	432	9.6	0.015	88.6	2.1	0.0033
MC13ST_4_15	7.3787	0.335	0.088	0.01683	0.00059	0.25386	59.4177	2.08297	0.142	0.033	0.036808	107.6	3.7	2264	170	95.24	0.127	14	67.9	2.1	347	13	8.6	0.76	0.198	0.012		736	35	0.18	Below LOD	Below LOD	4.8	5.95	0.2	0.03	1.01	0.1	0.025	4.35	0.38	0.064	466	17	0.011	95.8	3	0.0022
MC13ST_4_16	26.01	0.305	0.076	0.01704	0.00046	-0.020398	58.6855	1.58423	0.1305	0.028	0.43756	108.9	2.9	2098	200	94.8	0.1092	7	67.9	1.3	384.6	6.1	9.27	0.45	0.1776	0.003		755	16	0.1	Below LOD	Below LOD	2.8	5.75	0.12	0.015	0.886	0.034	0.014	4.69	0.23	0.043	516.7	8.1	0.003	95.9	1.9	0.0024
MC13ST_4_17	11.625	0.358	0.091	0.01698	0.00064	0.071825	58.8928	2.21975	0.15	0.034	0.40137	108.6	4.1	2330	260	95.22	0.136	-1	52.9	0.87	51.8	1.3	2.4	0.37	1.031	0.021		226.1	4.6	0.14	Below LOD	Below LOD	3.1	4.73	0.15	0.022	0.837	0.056	0.016	1.22	0.19	0.035	69.5	1.7	0.0069	74.8	1.2	0.0055
MC13ST_4_18	18.907	0.309	0.078	0.01718	0.00049	0.2642	58.2072	1.66016	0.131	0.029	0.19118	109.8	3.1	2105	240	94.75	0.1092	9	74.8	2.2	202	17	5.82	0.49	0.409	0.048		520	36	0.12	Below LOD	Below LOD	3.2	6.41	0.19	0.019	0.995	0.051	0.016	2.95	0.25	0.045	271	23	0.014	105.8	3.1	0.0064
MC13ST_4_19	15.234	0.724	0.18	0.01996	0.00068	0.46978	50.1002	1.70682	0.263	0.058	-0.058113	127.4	4.3	3256	230	96.085	0.279	14	77.4	1.2	403.4	7.6	12.4	0.64	0.1936	0.004		810	13	0.15	Below LOD	Below LOD	5.3	7.81	0.18	0.041	2.44	0.16	0.031	6.28	0.32	0.14	541	10	0.034	109.5	1.6	0.017
MC13ST_4_2	26.162	0.552	0.14	0.01874	0.0006	0.19613	53.3618	1.70849	0.213	0.048	-0.024269	119.6	3.8	2960	320	95.9	0.215	17	60	1.4	158	18	5.64	0.58	0.436	0.043		437	36	0.071	Below LOD	Below LOD	2.4	5.55	0.15	0.014	1.41	0.12	0.012	2.82	0.29	0.035	213	25	0.0029	84	2	0.0009
MC13ST_4_20	8.8551	0.493	0.13	0.01798	0.00071	0.034043	55.6174	2.19624	0.197	0.045	0.36825	114.9	4.5	2804	230	95.89	0.198	8	59.6	1	281.6	5.3	8.24	0.51	0.2134	0.0042		774	13	0.14	Below LOD	Below LOD	3.4	5.59	0.16	0.024	1.31	0.11	0.02	4.18	0.26	0.051	377.7	7.1	0.009	84.3	1.5	0.0025
MC13ST_4_21	26.045	0.463	0.12	0.01849	0.00058	0.30565	54.0833	1.6965	0.1816	0.04	0.21083	118.1	3.7	2659	230	95.54	0.1752	1.4	43.2	1.4	72	1.7	2.88	0.22	0.602	0.013		332	7.4	0.097	Below LOD	Below LOD	2.4	3.98	0.12	0.03	0.854	0.037	0.013	1.46	0.11	0.03	96.6	2.2	0.025	61.1	2	0.0036
MC13ST_4_22	24.003	0.315	0.079	0.01844	0.00061	0.23964	54.2299	1.79394	0.124	0.027	0.22677	117.8	3.9	2004	270	94.05	0.1006	9	69.4	1.7	72	1.6	2.81	0.28	0.979	0.033		243.8	4.4	0.098	Below LOD	Below LOD	2.4	6.49	0.21	0.016	0.951	0.052	0.015	1.43	0.14	0.0066	96.5	2.2	0.0032	98.3	2.4	0.00026
MC13ST_4_23	26.031	0.419	0.1	0.01721	0.00054	0.27491	58.1058	1.82319	0.1769	0.039	0.29359	110	3.4	2617	220	95.78	0.1691	-3.5	49.3	1.1	165.1	7.5	4.58	0.31	0.302	0.009		465	17	0.095	Below LOD	Below LOD	2.9	4.216	0.093	0.012	0.884	0.04	0.013	2.33	0.16	0.035	221	10	0.003	69.8	1.6	0.001
MC13ST_4_24	26.004	0.322	0.081	0.01688	0.00054	0.49857	59.2417	1.89517	0.142	0.032	-0.089526	107.9	3.4	2269	280	95.18	0.124	-5	62.7	1.4	247	23	6.75	0.63	0.285	0.026		663	56	0.13	Below LOD	Below LOD	3.6	5.3	0.15	0.024	0.869	0.044	0.021	3.43	0.32	0.055	331	31	0.022	88.7	2	0.0023
MC13ST_4_25	26.029	19.9	5.5	0.194	0.024	0.99463	5.15464	0.637687	0.734	0.16	-0.78973	1130	130	4795	250	76.6	0.559	19.9	66.5	2.8	258.7	9.2	121	15	0.2596	0.0067		571	14	0.13	57.6	8.7	2.2	63.9	8	0.011	56.2	7.3	0.014	61.4	7.4	0.036	346	12	0.003	94.1	3.9	0.0036
MC13ST_4_26	25.082	0.338	0.086	0.01685	0.00057	0.46958	59.3472	2.00759	0.1461	0.032	-0.22062	107.7	3.6	2367	420	95.39	0.1293	-1	69.1	2.1	340	12	8.43	0.5	0.2058	0.003		759	20	0.11	Below LOD	Below LOD	2.3	5.85	0.18	0.043	1.011	0.061	0.012	4.28	0.25	0.048	454	16	0.0031	97.7	2.9	0.0021
MC13ST_4_27	24.898	0.2871	0.072	0.01559	0.00045	-0.051192	64.1437	1.85149	0.1351	0.029	0.4759	99.7	2.9	2143	140	95.36	0.1151	3	75.1	1.8	404.5	9.5	9.12	0.4	0.1876	0.0028		948	20	0.11	Below LOD	Below LOD	1.8	5.88	0.14	0.015	0.937	0.033	0.013	4.63	0.2	0.041	540	13	0.0031	106.2	2.5	0.0012
MC13ST_4_28	26.031	0.373	0.093	0.017	0.00052	0.27306	58.8235	1.79931	0.1594	0.035	0.17134	108.6	3.3	2446	250	95.53	0.1466	3.1	60.5	2.6	111.1	4.9	3.84	0.32	0.551	0.011		339	12	0.089	Below LOD	Below LOD	2	5.13	0.19	0.011	0.964	0.042	0.011	1.95	0.16	0.025	148.4	6.5	0.003	85.5	3.6	0.0013
MC13ST_4_29	23.415	0.319	0.08	0.01637	0.00049	0.26261	61.0874	1.82852	0.1413	0.031	0.12122	104.7	3.1	2242	200	95.31	0.1232	9.3	61.1	1.7	212	29	5.35	0.61	0.346	0.038		564	69	0.1	2.3	1.2	2.1	5.07	0.16	0.017	0.851	0.049	0.014	2.71	0.31	0.048	283	38	0.0034	86.3	2.4	0.0051
MC13ST_4_3	26.024	0.331	0.083	0.01693	0.00048	0.31237	59.0667	1.67466	0.1422	0.031	-0.084268	108.2	3.1	2241	290	95.16	0.1241	26.8	61.6	1	156.1	6.2	4.58	0.37	0.398	0.01		457	19	0.089	2.6	1	1.7	5.16	0.11	0.016	0.865	0.041	0.01	2.29	0.18	0.044	210.4	8.3	0.0029	86.3	1.4	0.00023
MC13ST_4_30	18.103	2.895	0.72	0.04136	0.0012	0.5692	24.1779	0.701488	0.51	0.11	0.23085	261.3	7.7	4269	150	93.88	0.562	36	73.6	1.1	187	11	22.8	1	0.406	0.017		439	24	0.099	11.7	2.6	3.4	14.98	0.36	0.014	9.05	0.25	0.0084	11.58	0.52	0.06	249	14	0.0044	103.9	1.5	0.002
MC13ST_4_31	26.043	0.284	0.072	0.01687	0.00051	0.16554	59.2768	1.79201	0.1224	0.027	0.20732	107.9	3.2	1975	280	94.46	0.0988	-4	77.7	1.6	523	13	12.4	0.56	0.1506	0.0023		1002	19	0.041	Below LOD	Below LOD	2.5	6.57	0.16	0.01	0.951	0.047	0.041	6.28	0.29	0.031	697	18	0.003	109.8	2.3	0.0058
MC13ST_4_32	26.026	0.356	0.089	0.0171	0.00056	-0.041778	58.4795	1.91512	0.1512	0.033	0.073797	109.3	3.5	2353	250	95.31	0.1361	2.1	54.6	1.1	58.1	1.3	2.5	0.22	0.959	0.037		265.3	3.9	0.07	Below LOD	Below LOD	1.6	4.66	0.13	0.0073	0.832	0.038	0.03	1.27	0.11	0.0061	77.4	1.7	0.003	77.1	1.6	0.0013
MC13ST_4_33	26.048	0.321	0.08	0.01729	0.00049	-0.054927	57.8369	1.6391	0.1348	0.03	0.42845	110.5	3.1	2150	240	94.82	0.1147	5	67.6	1.4	275.1	5.9	7.18	0.33	0.2508	0.0099		784	12	0.12	Below LOD	Below LOD	2.5	5.84	0.12	0.016	0.932	0.042	0.014	3.63	0.17	0.034	365.9	7.8	0.003	95.3	2	0.0014
MC13ST_4_34	14.113	0.411	0.1	0.01793	0.00068	0.16434	55.7724	2.11518	0.165	0.037	0.39399	114.6	4.3	2496	240	95.39	0.156	-1	48.9	1.4	133.7	4.5	4.46	0.36	0.3703	0.0073		429	11	0.11	Below LOD	Below LOD	3.3	4.53	0.16	0.015	0.888	0.061	0.017	2.25	0.18	0.055	177.7	6	0.0055	68.8	2	0.0019
MC13ST_4_35	8.4921	0.534	0.14	0.01889	0.00085	0.085966	52.9381	2.38207	0.205	0.047	0.45164	120.6	5.4	2863	270	95.77	0.206	25	66.01	0.93	96.8	2.4	4.76	0.58	0.691	0.017		334	7.6	0.19	Below LOD	Below LOD	5	6.38	0.24	0.024	1.55	0.11	0.024	2.4	0.29	0.063	128.5	3.1	0.0097	92.8	1.3	0.002
MC13ST_4_36	24.956	0.285	0.071	0.01599	0.00044	0.35839	62.5391	1.7209	0.1287	0.028	0.1844	102.3	2.8	2071	230	95.01	0.1067	0	67.6	1.3	77.2	1.6	2.61	0.19	0.888	0.02		299.5	7.8	0.16	Below LOD	Below LOD	4.8	5.44	0.11	0.027	0.831	0.033	0.016	1.317	0.096	0.047	102.5	2.1	0.0032	95	1.8	0.0025
MC13ST_4_37	24.533	0.411	0.1	0.01654	0.00053	0.092051	60.4595	1.93734	0.1809	0.04	0.4404	105.7	3.4	2655	220	96	0.174	-4.7	48.86	0.99	119.4	4.6	4.08	0.27	0.4175	0.0096		391	17	0.1	Below LOD	Below LOD	1.6	4.04	0.097	0.016	0.865	0.035	0.013	2.06	0.14	0.042	158.4	6.1	0.0032	68.6	1.4	0.0012
MC13ST_4_38	26.01	0.324	0.081	0.01829	0.00056	0.56513	54.6747	1.67402	0.1296	0.028	-0.083531	116.9	3.5	2070	240	94.32	0.1079	6	64.2	1.7	60.2	2.5	2.73	0.23	1.088	0.023		232.1	7.1	0.11	Below LOD	Below LOD	2.4	5.87	0.16	0.013	0.893	0.041	0.013	1.38	0.12	0.022	79.8	3.3	0.003	90.1	2.4	0.0015
MC13ST_4_39	24.38	0.39	0.1	0.01803	0.00062	0.76279	55.4631	1.90722	0.158	0.036	-0.51964	115.2	3.9	2390	320	95.1	0.144	14	66.6	1.7	351.1	8.1	9.15	0.53	0.191	0.0034		755	16	0.087	3.1	1.3	2.8	6.01	0.2	0.015	1.13	0.11	0.011	4.61	0.27	0.025	465	11	0.0032	93.3	2.3	0.0032
MC13ST_4_4	26.19	0.327	0.084	0.01608	0.00043	0.31164	62.1891	1.66302	0.15	0.034	-0.016524	102.8	2.7	2304	290	95.44	0.134	5.4	63.9	1.5	190.8	5.5	5.18	0.36	0.3346	0.0055		493	18	0.078	2.6	1.4	2.2	5.06	0.089	0.012	0.885	0.059	0.012	2.59	0.18	0.039	257.2	7.4	0.013	89.6	2.1	0.0031
MC13ST_4_40	20.722	0.287	0.075	0.01725	0.00054	0.60473	57.971	1.81475	0.1222	0.028	-0.32944	110.3	3.4	1940	310	94.17	0.098	1	80.5	1.7	84.9	2.3	3.1	0.26	0.962	0.022		244.8	5.6	0.17	Below LOD	Below LOD	4	6.97	0.17	0.03	1.021	0.096	0.022	1.56	0.13	0.064	112.4	3.1	0.0038	112.7	2.4	0.0022
MC13ST_4_41	24.445	0.37	0.093	0.01658	0.00054	0.11206	60.3136	1.96438	0.1609	0.035	0.35228	106	3.4	2471	270	95.72	0.1486	-8	64	1.5	223.3	5.8	5.78	0.37	0.2902	0.0055		541	12	0.092	Below LOD	Below LOD	2.7	5.28	0.15	0.016	1.018	0.049	0.01	2.89	0.19	0.034	294.3	7.6	0.02	89.2	2.1	0.0024
MC13ST_4_42	7.3838	1.114	0.28	0.02206	0.001	0.33131	45.3309	2.05489	0.363	0.08	0.3994	140.6	6.5	3759	270	96.25	0.414	-2	46.1	1.4	200.4	5.4	8.47	0.7	0.2327	0.0033		525	13	0.12	6.3	3.6	4.2	5.2	0.23	0.021	2.24	0.1	0.035	4.24	0.35	0.06	263.9	7.1	0.029	64.3	1.9	0.0023
MC13ST_4_43	26.036	0.307	0.077	0.01825	0.00053	0.11628	54.7945	1.59129	0.1219	0.027	0.37002	116.6	3.3	1983	220	94.08	0.0982	-2	70.6	2	67.6	2	2.76	0.2	1.058	0.019		223.2	5.2	0.081	Below LOD	Below LOD	2.2	6.35	0.17	0.013	0.917	0.034	0.012	1.38	0.1	0.033	88.9	2.6	0.0084	98.3	2.8	0.0028
MC13ST_4_44	23.54	0.338	0.084	0.01563	0.00051	0.22022	63.9795	2.08762	0.1574	0.034	0.35807	100	3.2	2426	210	95.89	0.1439	9.4	64.7	1.4	140.1	4.5	4.07	0.33	0.4694	0.0092		477	13	0.078	2.7	1.3	2.4	4.97	0.13	0.015	0.926	0.033	0.012	2.03	0.16	0.04	184.1	5.9	0.0033	90	1.9	0.002
MC13ST_4_45	22.961	1.187	0.3	0.02393	0.00086	0.65753	41.7886	1.5018	0.357	0.078	-0.20684	152.4	5.4	3730	250	95.916	0.403	14	66	2.2	152.6	3	9.51	0.44	0.439	0.017		368.1	7.8	0.1	3.5	1.3	2.5	7.86	0.24	0.015	3.34	0.17	0.015	4.74	0.22	0.051	200.3	4	0.019	91.7	3.1	0.0022
MC13ST_4_46	20.387	0.35	0.088	0.01822	0.00052	0.31404	54.8847	1.56641	0.1393	0.03	0.11221	116.4	3.3	2214	240	94.72	0.1203	1	58.1	1.2	36.23	0.91	2.28	0.27	1.6	0.041		266.8	6.2	0.089	Below LOD	Below LOD	2.8	5.23	0.12	0.015	0.866	0.041	0.016	1.14	0.13	0.051	47.5	1.2	0.0039	80.6	1.7	0.0013
MC13ST_4_47	26.032	0.307	0.077	0.01579	0.00046	0.29375	63.3312	1.84499	0.141	0.031	0.18122	101	2.9	2227	270	95.43	0.123	0	62.7	1.4	262.9	9.6	6.57	0.38	0.2428	0.0046		750	15	0.099	Below LOD	Below LOD	2.1	4.87	0.12	0.015	0.814	0.036	0.011	3.27	0.19	0.04	345	13	0.0092	86.9	1.9	0.0013
MC13ST_4_48	6.3678	0.944	0.25	0.02246	0.001	0.74652	44.5236	1.98235	0.306	0.069	-0.4861	143.1	6.5	3491	290	95.9	0.332	-2	64.1	1.7	213.3	4.3	9.12	0.84	0.3038	0.0099		603	16	0.15	Below LOD	Below LOD	4.4	6.57	0.32	0.027	2.41	0.26	0.02	4.54	0.42	0.055	279.3	5.7	0.012	88.7	2.3	0.003
MC13ST_4_49	12.083	0.348	0.088	0.01889	0.00063	0.085974	52.9381	1.76554	0.1322	0.029	0.3666	120.6	4	2128	290	94.3	0.1133	4	62.2	1.1	86	3.9	3.33	0.46	0.736	0.026		242.4	6.7	0.13	Below LOD	Below LOD	2.9	5.96	0.17	0.02	0.94	0.062	0.017	1.65	0.23	0.057	112.2	5.1	0.0065	85.7	1.6	0.0023
MC13ST_4_5	26.039	0.319	0.08	0.01637	0.00052	0.1976	61.0874	1.94047	0.1416	0.031	0.28454	104.7	3.3	2247	210	95.33	0.1235	18	62.4	1.1	235.9	5.4	5.96	0.38	0.265	0.0073		682	17	0.073	3.1	1.3	1.9	5.06	0.14	0.014	0.846	0.037	0.011	2.99	0.19	0.032	317.8	7.2	0.0029	87.4	1.6	0.0027
MC13ST_4_50	14.794	0.413	0.1	0.01679	0.00052	0.36307	59.5593	1.8446	0.177	0.039	0.0077403	107.3	3.3	2610	220	95.87	0.171	5	53.19	0.86	139.9	3.2	4.38	0.41	0.385	0.0092		346.2	7.2	0.11	2.6	1.6	2.5	4.52	0.12	0.018	0.95	0.061	0.016	2.16	0.2	0.039	182.3	4.1	0.0053	73.2	1.2	0.00042
MC13ST_4_51	20.445	0.452	0.11	0.01801	0.00055	0.39298	55.5247	1.69565	0.1819	0.04	0.058267	115.1	3.5	2663	230	95.66	0.175	-8	70.5	1.5	155.8	5.7	5.55	0.29	0.46	0.012		453	12	0.092	Below LOD	Below LOD	2.3	6.15	0.15	0.015	1.329	0.06	0.014	2.74	0.14	0.035	202.9	7.4	0.0039	97	2	0.0027
MC13ST_4_52	24.945	0.408	0.1	0.01784	0.00052	0.66005	56.0538	1.63386	0.1627	0.036	-0.43935	114	3.3	2476	350	95.33	0.151	6	65.52	0.96	41.4	2.3	2.63	0.25	1.648	0.077		220	6.7	0.098	2.5	1.3	2.4	5.73	0.12	0.015	1.128	0.078	0.011	1.3	0.12	0.032	53.9	3	0.011	90	1.3	0.002
MC13ST_4_53	16.167	0.42	0.11	0.01651	0.00059	0.41975	60.5694	2.1645	0.182	0.043	-0.16665	105.6	3.7	2620	320	95.9	0.177	-2	66.5	1.1	290.2	8.7	7.84	0.59	0.2332	0.0097		678	23	0.14	Below LOD	Below LOD	2.6	5.47	0.14	0.016	1.19	0.12	0.016	3.86	0.29	0.045	377	11	0.015	91.3	1.6	0.0034
MC13ST_4_54	18.174	0.294	0.074	0.01671	0.00048	0.42571	59.8444	1.71905	0.1275	0.028	-0.13042	106.9	3.1	2064	220	94.8	0.1047	-3	74.16	0.76	68.7	4.3	2.62	0.26	1.137	0.086		249	10	0.1	Below LOD	Below LOD	2.5	5.94	0.16	0.015	0.902	0.049	0.013	1.29	0.13	0.04	89.2	5.6	0.0043	101.7	1	0.0015
MC13ST_4_55	9.1319	0.3	0.076	0.01609	0.00075	-0.077639	62.1504	2.89701	0.134	0.031	0.66157	102.9	4.7	2146	210	95.17	0.116	-2	53.34	0.67	100.1	3	2.94	0.38	0.54	0.018		395.9	9.5	0.12	Below LOD	Below LOD	3.7	4.35	0.17	0.02	0.689	0.041	0.019	1.44	0.19	0.051	129.9	3.9	0.0086	73.06	0.91	0.0054
MC13ST_4_56	26.006	0.299	0.075	0.01749	0.00049	0.2135	57.1755	1.60183	0.1238	0.027	0.18516	111.8	3.1	2000	200	94.38	0.1008	-3	66.3	1.2	119.5	6.4	3.77	0.3	0.576	0.026		415	18	0.072	Below LOD	Below LOD	2.3	5.6	0.11	0.014	0.824	0.036	0.011	1.85	0.15	0.027	155	8.3	0.003	90.7	1.7	0.0017
MC13ST_4_57	19.536	0.569	0.14	0.01916	0.00064	0.18978	52.1921	1.74337	0.214	0.047	0.24951	122.4	4	2926	270	95.84	0.219	-4	65.5	1.2	350	8.7	10.34	0.62	0.19	0.007		758	17	0.084	2.8	1.5	2.6	6.23	0.16	0.016	1.589	0.091	0.011	5.04	0.3	0.039	453	11	0.004	89.3	1.7	0.00084
MC13ST_4_58	6.5453	0.455	0.12	0.01781	0.00091	0.31287	56.1482	2.86889	0.186	0.042	-0.20116	113.8	5.7	2940	730	96.09	0.179	3	78.8	1.4	204.7	5.6	6.6	2.1	0.389	0.015		787	20	0.15	Below LOD	Below LOD	4.5	6.27	0.31	0.024	1.39	0.17	0.021	3.2	1	0.071	264.6	7.2	0.013	107.3	1.9	0.0061
MC13ST_4_59	26.008	0.302	0.076	0.01707	0.00048	0.28768	58.5823	1.64731	0.1282	0.028	0.22026	109.1	3	2064	200	94.68	0.1065	-8	69.4	1.3	78	6.5	2.87	0.25	0.991	0.094		258.7	6.8	0.14	Below LOD	Below LOD	4.1	5.71	0.12	0.027	0.87	0.036	0.022	1.4	0.12	0.058	100.8	8.4	0.003	94.4	1.7	0.0041
MC13ST_4_6	26.004	0.312	0.078	0.01672	0.00048	0.13978	59.8086	1.71699	0.1354	0.029	0.30249	106.9	3	2166	210	95.05	0.1152	4	69.64	0.81	72.5	9.3	2.83	0.28	1.13	0.11		269	16	0.081	1.8	1.2	1.7	5.77	0.1	0.013	0.921	0.033	0.025	1.42	0.14	0.022	98	12	0.014	97.7	1.1	0.0032
MC13ST_4_60	22.523	0.306	0.077	0.01613	0.00046	0.032435	61.9963	1.76803	0.1376	0.03	0.34416	103.2	2.9	2182	260	95.22	0.1189	3.1	62.4	1.5	404	12	9.53	0.48	0.1558	0.0028		908	25	0.085	3	1.3	2.6	4.92	0.13	0.018	0.804	0.039	0.015	4.63	0.23	0.053	522	15	0.0034	84.8	2.1	0.0015
MC13ST_4_61	26.027	0.303	0.076	0.01619	0.0005	0.32843	61.7665	1.90755	0.1362	0.03	0.14878	103.5	3.2	2171	240	95.22	0.1168	-7.4	61.42	0.83	92.5	2	3.08	0.24	0.671	0.014		282.8	7.7	0.11	Below LOD	Below LOD	2.2	4.79	0.11	0.016	0.774	0.033	0.013	1.5	0.12	0.022	119.3	2.5	0.003	83.4	1.1	0.0013
MC13ST_4_62	26.019	0.383	0.097	0.01902	0.00057	0.45033	52.5762	1.57563	0.1454	0.032	-0.15306	121.5	3.6	2300	310	94.68	0.1289	-5	62.6	1.1	63	1.3	2.89	0.28	1.002	0.019		228.8	4.6	0.16	Below LOD	Below LOD	3.6	5.73	0.12	0.023	0.993	0.052	0.02	1.4	0.14	0.07	81.3	1.7	0.003	84.9	1.4	0.0021
MC13ST_4_63	26.014	0.249	0.062	0.01507	0.00042	0.1714	66.357	1.84937	0.1198	0.026	0.23391	96.4	2.7	1949	220	95.03	0.0957	-2	80.2	1.9	469	12	10.15	0.47	0.1723	0.0031		865	16	0.084	Below LOD	Below LOD	2.4	5.81	0.13	0.015	0.828	0.037	0.011	4.91	0.23	0.036	604	15	0.012	108.7	2.6	0.0029
MC13ST_4_64	26.016	0.297	0.075	0.01692	0.00048	-0.029731	59.1016	1.67664	0.1274	0.028	0.20247	108.1	3.1	2096	320	94.85	0.1055	1	65.6	1.5	219	21	5.89	0.55	0.332	0.028		544	34	0.084	2.9	1.2	2.6	5.32	0.12	0.014	0.804	0.039	0.011	2.85	0.27	0.039	283	27	0.003	88.7	2	0.0013
MC13ST_4_65	24.53	0.285	0.072	0.01719	0.00054	0.13172	58.1734	1.82743	0.1205	0.027	0.33481	109.9	3.4	1968	240	94.37	0.0966	12	79.6	1.6	150.2	3.4	4.83	0.28	0.5323	0.0088		388.5	7.9	0.1	Below LOD	Below LOD	2.6	6.6	0.17	0.015	0.955	0.049	0.012	2.32	0.13	0.041	193.1	4.4	0.0032	107.2	2.1	0.0019
MC13ST_4_66	26.011	0.315	0.079	0.01794	0.00053	0.37059	55.7414	1.64676	0.127	0.028	0.068807	114.6	3.3	2063	190	94.44	0.105	-10	66	1.1	197	12	5.89	0.49	0.348	0.017		560	24	0.089	Below LOD	Below LOD	2.1	5.66	0.12	0.013	0.855	0.036	0.01	2.83	0.23	0.031	253	16	0.0076	88.9	1.5	0.0013
MC13ST_4_67	15.678	0.294	0.074	0.01764	0.00059	-0.078695	56.6893	1.89607	0.1211	0.027	0.47811	112.7	3.8	1956	270	94.16	0.0971	-19	77.6	1.5	99.3	8	3.2	0.3	0.817	0.061		321	19	0.1	Below LOD	Below LOD	3	6.63	0.19	0.017	0.936	0.046	0.013	1.54	0.14	0.031	128	10	0.011	104.3	2	0.0022
MC13ST_4_68	19.556	0.771	0.2	0.02131	0.00084	0.73584	46.9263	1.84975	0.259	0.057	-0.4353	135.9	5.3	3217	300	95.77	0.276	-2	66.3	2.1	74	5.3	6.21	0.79	0.923	0.041		270	15	0.11	2.7	1.4	2.5	6.93	0.35	0.016	2.17	0.2	0.013	2.98	0.38	0.03	95.1	6.9	0.004	89	2.9	0.0013
MC13ST_4_69	25.211	0.301	0.076	0.01632	0.00046	0.21219	61.2745	1.7271	0.1333	0.029	0.16891	104.4	2.9	2128	240	95.06	0.1131	-4	70.6	2.1	171	16	4.87	0.5	0.438	0.023		400	27	0.082	Below LOD	Below LOD	2.7	5.52	0.16	0.014	0.873	0.043	0.012	2.33	0.24	0.031	219	21	0.0031	94.7	2.8	0.0018
MC13ST_4_7	26.059	0.287	0.072	0.01695	0.00046	0.098533	58.9971	1.6011	0.1231	0.027	0.35625	108.4	2.9	1993	230	94.56	0.0996	1	73.6	1.3	72.2	1.9	2.78	0.25	1.021	0.018		244.4	4.8	0.072	Below LOD	Below LOD	2.4	6.18	0.12	0.011	0.898	0.037	0.011	1.39	0.13	0.028	97.2	2.5	0.0029	103.3	1.9	0.002
MC13ST_4_70	25.013	0.337	0.085	0.01584	0.00043	0.3872	63.1313	1.71379	0.1524	0.033	0.006057	101.3	2.7	2372	250	95.73	0.138	4.2	56.6	1.2	207.3	3.9	5.04	0.29	0.2735	0.0063		607	10	0.095	2.8	1.1	2.4	4.292	0.08	0.014	0.787	0.034	0.013	2.41	0.14	0.035	266.1	5	0.0031	75.8	1.6	0.0018
MC13ST_4_71	26.02	0.351	0.088	0.01747	0.00045	-0.019009	57.241	1.47444	0.1459	0.032	0.43865	111.7	2.9	2288	190	95.09	0.1295	0.1	58.2	1.1	133	13	3.84	0.37	0.492	0.048		364	23	0.12	Below LOD	Below LOD	3.3	4.841	0.063	0.019	0.837	0.033	0.026	1.84	0.18	0.052	171	16	0.014	78	1.4	0.0015
MC13ST_4_72	25.054	0.3	0.075	0.01698	0.00053	0.1934	58.8928	1.83823	0.128	0.028	0.33054	108.5	3.3	2065	210	94.72	0.1064	-12	63.9	1.6	231	17	6.07	0.49	0.287	0.013		526	36	0.1	Below LOD	Below LOD	2.6	5.19	0.15	0.015	0.79	0.035	0.011	2.9	0.24	0.037	297	21	0.0031	85.6	2.2	0.0025
MC13ST_4_73	26.012	0.307	0.077	0.01649	0.00047	0.26135	60.6428	1.72845	0.1362	0.03	0.21505	105.4	3	2179	210	95.15	0.117	-8	65.01	0.9	324	16	7.72	0.51	0.2057	0.0088		707	27	0.078	Below LOD	Below LOD	2.2	5.09	0.1	0.014	0.823	0.034	0.012	3.68	0.24	0.038	415	21	0.015	86.7	1.2	0.0023
MC13ST_4_74	26.297	0.329	0.082	0.0168	0.00052	0.18429	59.5238	1.8424	0.1422	0.031	0.38927	107.4	3.3	2248	260	95.19	0.1248	0.3	61.1	1.1	49.8	1.2	2.36	0.21	1.228	0.026		268.5	6.3	0.1	3.1	1.2	2.2	4.88	0.13	0.013	0.82	0.028	0.01	1.12	0.1	0.025	63.9	1.6	0.003	81.4	1.5	0.0011
MC13ST_4_75	22.313	0.352	0.089	0.01653	0.00051	0.26048	60.4961	1.86648	0.1543	0.034	0.23839	105.7	3.2	2385	230	95.54	0.1402	-9	61.4	1.2	105.3	7.6	3.8	0.35	0.607	0.034		351	11	0.097	2.8	1.4	2.3	4.88	0.1	0.014	0.878	0.038	0.012	1.81	0.17	0.048	135.1	9.7	0.0035	81.8	1.5	0.0013
MC13ST_4_76	26.007	0.276	0.069	0.01638	0.00047	0.32228	61.0501	1.75174	0.1216	0.027	0.071798	104.7	3	1976	200	94.67	0.0979	-12	73.7	1.8	128.9	4.1	4.13	0.35	0.572	0.012		347.7	7.2	0.095	Below LOD	Below LOD	2.5	5.71	0.12	0.013	0.828	0.042	0.012	1.96	0.17	0.032	165.3	5.2	0.0073	98	2.4	0.0015
MC13ST_4_77	26.013	0.318	0.08	0.01653	0.00049	0.31328	60.4961	1.79329	0.1394	0.03	0.12994	105.7	3.1	2231	230	95.24	0.1211	-9	63.18	0.54	117.6	2.7	3.77	0.3	0.538	0.012		344.1	7.2	0.16	Below LOD	Below LOD	4.7	4.95	0.12	0.027	0.818	0.033	0.022	1.79	0.14	0.025	150.8	3.5	0.012	83.95	0.72	0.0018
MC13ST_4_78	26.005	0.336	0.084	0.0177	0.0005	0.032477	56.4972	1.59597	0.1373	0.03	0.40141	113.1	3.2	2187	210	94.8	0.1184	-14	63.18	0.64	117.2	4.9	4.38	0.35	0.548	0.023		358	20	0.082	Below LOD	Below LOD	2.3	5.3	0.12	0.015	0.864	0.037	0.013	2.08	0.16	0.042	150.3	6.3	0.003	83.87	0.85	0.0015
MC13ST_4_79	26.045	0.301	0.075	0.01681	0.00051	0.31015	59.4884	1.80482	0.1306	0.029	0.29382	107.4	3.2	2100	190	94.9	0.1098	-16	69.9	1.4	210.1	4.8	5.74	0.4	0.3326	0.0074		648	12	0.095	2.7	1.5	2.2	5.54	0.11	0.013	0.861	0.037	0.01	2.72	0.19	0.024	269.5	6.1	0.003	92.7	1.8	0.00092
MC13ST_4_8	16.695	1.48	0.37	0.02806	0.00095	0.36301	35.6379	1.20656	0.381	0.083	0.40968	178.4	6	3829	150	95.34	0.435	38	57.7	1.4	82.3	5.4	8.83	0.61	0.717	0.031		285	13	0.13	4.1	1.6	3.6	8.3	0.29	0.022	3.73	0.16	0.019	4.44	0.31	0.056	110.7	7.2	0.011	81.1	1.9	0.0028
MC13ST_4_80	20.841	0.296	0.075	0.01905	0.00055	0.13915	52.4934	1.51556	0.1122	0.025	0.24067	121.7	3.5	1814	280	93.18	0.0861	1	58.5	1.8	26.13	0.96	1.79	0.17	2.28	0.15		205.9	3.8	0.09	3.3	1.5	2.4	5.38	0.18	0.015	0.715	0.037	0.013	0.846	0.083	0.033	33.5	1.2	0.011	77.5	2.3	0.0017
MC13ST_4_9	26.047	0.3	0.075	0.0166	0.00047	0.53829	60.241	1.70562	0.1329	0.029	-0.22146	106.1	3	2120	260	94.98	0.1121	23	77.7	1.7	451	12	10.7	0.43	0.1729	0.0026		814	20	0.15	Below LOD	Below LOD	4.4	6.4	0.14	0.028	0.992	0.048	0.024	5.39	0.21	0.056	607	16	0.0029	109.3	2.3	0.0016
Standard
T_Khan_1	26.076	0.6688	0.17	0.08375	0.002	0.21684	11.9403	0.285141	0.05789	0.012	0.57212	518.4	12	525	230	0.5	0.00028	380	610	22	487	18	59.2	1.9	1.24	0.016		630	24	0.16	Below LOD	Below LOD	3.5	250.6	6	0.024	17.15	0.43	0.017	29.47	0.95	0.061	658	25	0.0029	851	31	0.0012
T_Khan_2	26.038	0.6688	0.17	0.08397	0.002	0.57906	11.909	0.283649	0.05786	0.012	0.079878	519.8	12	525	270	0	0.00044	540	584	19	469	16	56.4	1.6	1.237	0.017		597	19	0.079	Below LOD	Below LOD	2.7	240.4	5.5	0.016	16.45	0.41	0.013	28.08	0.82	0.039	633	22	0.0028	816	27	0.00097
T_Khan_3	26.072	0.6655	0.16	0.08397	0.002	0.53385	11.909	0.283649	0.05743	0.012	0.3402	519.8	12	506	320	-4	0.00084	1110	580	18	468	15	56.3	1.7	1.23	0.017		582	17	0.13	Below LOD	Below LOD	2.4	239.5	5.3	0.024	16.27	0.38	0.015	28.05	0.85	0.063	632	20	0.0029	810	25	0.00023
T_Khan_4	26.012	0.6722	0.17	0.08424	0.002	0.2009	11.8709	0.281834	0.05797	0.012	0.35486	521.4	12	540	270	2.2	0.0014	550	584	19	474	15	57.3	1.7	1.232	0.017		593	19	0.1	Below LOD	Below LOD	2.8	242.6	5.5	0.017	16.72	0.41	0.015	28.78	0.88	0.05	638	20	0.016	820	26	0.0041
T_Khan_5	26.007	0.963	0.25	0.0861	0.0021	0.78055	11.6144	0.283278	0.0798	0.018	-0.69569	532.1	13	1100	430	37.9	0.0284	550	588	18	484	16	72	3.3	1.225	0.017		602	19	0.11	8.5	2.7	2.7	252.4	3.2	0.021	23.7	1.7	0.017	36.4	1.6	0.046	650	22	0.003	831	25	0.0039
T_Khan_6	26.015	0.6589	0.16	0.08325	0.002	0.37294	12.012	0.288577	0.05731	0.012	0.60737	515.5	12	503	290	-3.6	0.00065	120	572	15	464	13	54.1	1.4	1.245	0.018		597	15	0.1	Below LOD	Below LOD	2	238.5	4.4	0.016	16.22	0.28	0.031	27.44	0.72	0.026	622	17	0.017	810	21	0.0039
T_Khan_7	26.008	0.6627	0.16	0.08312	0.002	0.46117	12.0308	0.28948	0.05749	0.012	0.34693	514.7	12	516	300	-0.2	0.001	250	580	20	474	16	55.3	1.6	1.238	0.018		585	20	0.091	Below LOD	Below LOD	2.5	235.7	5.4	0.016	16.18	0.41	0.014	27.46	0.81	0.034	619	21	0.003	802	27	0.001
T_Khan_8	26.05	0.713	0.18	0.08404	0.002	0.47829	11.8991	0.283177	0.0613	0.013	-0.1384	520.2	12	644	410	14.6	0.0051	-220	576	20	473	16	57.9	2.7	1.228	0.019		570	20	0.18	Below LOD	Below LOD	5.3	234	6.1	0.03	17.18	0.79	0.035	28.4	1.3	0.067	613	21	0.016	787	28	0.0027
T_Khan_9	26.023	0.6622	0.16	0.08329	0.002	0.38329	12.0062	0.2883	0.05743	0.012	0.45392	515.7	12	508	270	-2.1	0.00078	-710	574	20	462	16	54.9	1.8	1.241	0.018		559	20	0.13	Below LOD	Below LOD	3.7	226.7	5.4	0.022	15.52	0.42	0.018	26.24	0.88	0.052	593	20	0.003	768	27	0.0021
T_Khan_10	26.101	0.6691	0.17	0.08394	0.002	0.15554	11.9133	0.283852	0.05757	0.012	0.53625	519.6	12	511	250	-2.1	0.00051	-240	600	20	485	16	57.6	1.8	1.228	0.014		579	20	0.11	2.9	1.3	2.6	237	5.8	0.016	16.24	0.39	0.013	27.27	0.87	0.034	622	21	0.011	793	26	0.0018
T_Khan_11	26.009	0.98	0.27	0.0866	0.0022	0.85363	11.5473	0.293351	0.0804	0.019	-0.79905	535.3	13	1050	410	30.3	0.028	300	590	21	473	19	72.2	4.4	1.239	0.016		569	22	0.1	9.5	3.1	2.6	239.4	4	0.017	22.6	2.3	0.014	34.1	2.1	0.031	607	24	0.003	780	28	0.001
Standard
T_TCB_1	26.013	1.764	0.44	0.1735	0.0043	0.5502	5.76369	0.142846	0.07367	0.016	0.45023	1031	23	1031	250	-0.2	0.0003	710	305.6	8.7	673	21	156.6	4.3	0.4557	0.0068		708	21	0.13	Below LOD	Below LOD	3	262.9	5.8	0.021	22.94	0.52	0.015	78.8	2.2	0.053	905	28	0.0029	430	12	0.0011
T_TCB_2	26.065	1.747	0.43	0.1727	0.0043	0.58357	5.79039	0.144173	0.07327	0.016	0.38968	1027	24	1022	240	-0.7	0.00094	720	310.5	8.6	696	18	161.4	3.8	0.4494	0.0066		727	21	0.083	3.3	1.5	2.7	267.6	5.4	0.016	23.25	0.48	0.014	81.7	1.9	0.04	934	24	0.003	439	12	0.001
T_TCB_3	26.048	1.764	0.44	0.1749	0.0043	0.50762	5.71755	0.140569	0.07305	0.016	0.46364	1039	23	1013.4	210	-2.6	0.00047	420	307.9	9.1	681	20	157.9	4.8	0.4568	0.0077		710	21	0.16	3.7	1.5	2.8	269.6	6	0.028	23.38	0.52	0.018	80.1	2.4	0.074	912	27	0.003	436	13	0.00024
T_TCB_4	26.058	1.798	0.44	0.1765	0.0043	0.58528	5.66572	0.138032	0.07356	0.016	0.50189	1048	23	1032	260	-1.3	0.0012	210	280.4	8.2	622	19	145.8	4.3	0.4567	0.008		703	20	0.095	Below LOD	Below LOD	2.5	246.9	5.3	0.015	21.63	0.47	0.014	73.8	2.2	0.046	827	26	0.015	395	12	0.0036
T_TCB_5	26.261	1.759	0.43	0.1731	0.0043	0.64421	5.77701	0.143507	0.07349	0.016	0.26911	1029	24	1026	220	-0.4	0.0003	530	275.5	8.7	604	20	140.9	4.6	0.462	0.0076		687	21	0.088	2.18	0.89	2.1	236	5.7	0.017	20.63	0.51	0.013	70.8	2.3	0.037	797	26	0.003	385	12	0.0031
T_TCB_6	26.003	1.748	0.43	0.1732	0.0045	0.67841	5.77367	0.150009	0.07296	0.016	0.21627	1029	25	1014	190	-1.7	0.0003	-140	282.1	8.1	624	19	145.2	4.5	0.4574	0.008		686	21	0.11	2.3	1.3	2.1	238.8	5.7	0.016	20.73	0.52	0.033	72	2.2	0.027	815	24	0.017	389	11	0.0041
T_TCB_7	26.033	1.752	0.43	0.1729	0.0043	0.40332	5.78369	0.14384	0.07328	0.016	0.54849	1028	23	1022	210	-0.8	0.00122	-310	297.1	7	669	17	152.4	3.4	0.4481	0.0067		669	18	0.15	Below LOD	Below LOD	4.9	248.4	4.8	0.023	21.67	0.44	0.023	74.5	1.7	0.055	867	22	0.003	405.4	9.6	0.004
T_TCB_8	26.163	1.734	0.43	0.1712	0.0044	0.67436	5.84112	0.150122	0.073	0.016	0.50354	1022	26	1014	250	-0.5	0.0013	-700	279.6	7	626	16	144.2	3.4	0.4488	0.0059		623	17	0.12	Below LOD	Below LOD	3.1	229.8	4.2	0.019	19.98	0.38	0.017	69.6	1.7	0.048	805	20	0.0085	377.4	9.5	0.0025
Standard
G_NIST610_1	26.035	30.49	7.5	0.2612	0.0071	0.91513	3.82848	0.104067	0.846	0.18	0.37327	1496	36	4987.7	140	70.2	0.767	17.21	331	14	338	15	859	37	0.971	0.013		447	19	0.14	440	25	3.1	426	18	0.021	426	17	0.015	428	18	0.054	457	20	0.0029	463	20	0.0011
G_NIST610_2	26.048	30.4	7.5	0.2609	0.007	0.88595	3.83289	0.102837	0.8443	0.18	0.44169	1494	36	4983.2	160	69.75	0.781	17.58	329	13	341	14	845	34	0.966	0.013		449	18	0.16	425	18	5.5	427	17	0.032	427	16	0.027	425	17	0.077	459	19	0.0029	463	18	0.0018
G_NIST610_3	26.007	30.4	7.5	0.2624	0.0069	0.87951	3.81098	0.100212	0.8417	0.18	0.1328	1502	35	4984.8	160	70.03	0.757	17.32	327	13	341	14	844	36	0.963	0.011		452	19	0.1	429	22	1.9	428	16	0.019	427	17	0.012	427	18	0.05	458	19	0.003	462	19	0.00024
G_NIST610_4	26.012	30.28	7.5	0.2587	0.0071	0.88036	3.86548	0.106088	0.8443	0.18	0.45301	1483	36	4984.4	130	70.31	0.761	17.5	324	12	340	14	835	31	0.963	0.013		445	17	0.093	418	21	2.4	422	16	0.014	423	16	0.014	424	16	0.045	455	18	0.014	459	17	0.0035
G_NIST610_5	26.008	30.35	7.5	0.2606	0.0073	0.89867	3.8373	0.107492	0.843	0.18	0.45964	1493	37	4985.8	140	69.91	0.72	17.76	327	13	344	14	846	36	0.962	0.014		446	18	0.088	415	20	2.1	426	17	0.017	427	17	0.013	428	18	0.037	458	19	0.003	461	19	0.0031
G_NIST610_6	26.046	30.27	7.5	0.2613	0.0073	0.90697	3.82702	0.106916	0.8398	0.18	0.31046	1496	37	4981.8	140	69.83	0.75	17.08	328	13	342	15	832	36	0.972	0.014		447	19	0.098	429	23	1.9	424	17	0.015	423	17	0.029	418	18	0.025	451	19	0.016	458	19	0.0037
G_NIST610_7	26.02	30.19	7.5	0.2592	0.007	0.88112	3.85803	0.104191	0.8423	0.18	0.28662	1485	36	4984.8	120	70.3	0.746	17.54	337	14	355	15	872	40	0.961	0.011		451	19	0.17	423	21	5.5	428	17	0.026	429	17	0.026	432	20	0.062	464	20	0.003	466	19	0.0045
G_NIST610_8	26.021	30.18	7.5	0.2596	0.0069	0.89586	3.85208	0.102386	0.84	0.18	0.39115	1487	35	4981	140	69.84	0.731	17.45	339	15	351	15	870	39	0.974	0.013		448	20	0.11	431	22	3	427	18	0.018	427	18	0.016	426	19	0.047	455	20	0.0083	463	21	0.0024
G_NIST610_9	26.009	30.14	7.5	0.2625	0.0074	0.92934	3.80952	0.107392	0.836	0.18	0.44109	1502	37	4979.8	140	69.68	0.79	17.63	341	14	356	15	885	36	0.962	0.011		449	18	0.093	426	22	2.6	427	17	0.016	425	16	0.014	427	17	0.034	459	19	0.003	461	19	0.001
G_NIST610_10	26.046	30.12	7.4	0.2589	0.0068	0.90266	3.8625	0.101448	0.8428	0.18	0.24997	1484	34	4983.9	140	70.32	0.769	17.58	345	14	357	16	896	40	0.968	0.013		447	18	0.11	427	21	3.5	425	17	0.019	427	17	0.022	428	19	0.044	458	20	0.011	461	19	0.0018
G_NIST610_11	26.019	30.07	7.4	0.2591	0.007	0.89945	3.85951	0.104271	0.8382	0.18	0.37716	1485	36	4982.8	100	70.19	0.764	17.66	350	14	356	14	899	35	0.974	0.011		448	18	0.12	428	20	2.7	426	16	0.016	426	16	0.014	425	16	0.044	457	18	0.003	462	18	0.0011

## Sheet: Table S5 Zrn TE
Table S5. Zircon trace element data
Grain name	Duration	P	2SE	Ca	2SE	Sc	2SE	Ti	2SE	Sr	2SE	Y	2SE	Zr	2SE	Nb	2SE	La	2SE	Ce	2SE	Pr	2SE	Nd	2SE	Sm	2SE	Eu	2SE	Gd	2SE	Tb	2SE	Dy	2SE	Ho	2SE	Er	2SE	Tm	2SE	Yb	2SE	Lu	2SE	Hf	2SE	Ta	2SE
Sample_grain#	(s)	(ppm)		(ppm)		(ppm)		(ppm)		(ppm)		(ppm)		(ppm)		(ppm)		(ppm)		(ppm)		(ppm)		(ppm)		(ppm)		(ppm)		(ppm)		(ppm)		(ppm)		(ppm)		(ppm)		(ppm)		(ppm)		(ppm)		(ppm)		(ppm)
MC13ST-1_1	26.007	190	110	Below LOD	Below LOD	250	14	4.83	0.99	0.168	0.067	157.9	9.5	477000	31000	0.95	0.17	0.091	0.016	1.2	0.16	0.04	0.013	0.32	0.12	0.43	0.17	0.264	0.062	3.01	0.58	1.07	0.15	12.9	1.1	5.49	0.47	24.9	2	4.95	0.35	46.9	3.7	10.2	1	8520	660	0.23	0.065
MC13ST-1_2	26.01	160	75	Below LOD	Below LOD	250	20	2.1	0.59	0.138	0.061	132.5	8.6	474000	38000	0.76	0.14	0.028	0.011	0.7	0.13	Below LOD	Below LOD	Below LOD	Below LOD	Below LOD	Below LOD	0.126	0.037	1.94	0.36	0.66	0.1	9.5	1.1	3.88	0.39	22.6	1.8	5.13	0.47	58.8	5	14.1	1.3	7330	590	0.199	0.052
MC13ST-1_3	26.005	176	85	Below LOD	Below LOD	253	12	3.22	0.98	0.121	0.054	138.4	7.8	475000	22000	0.75	0.15	Below LOD	Below LOD	1	0.17	Below LOD	Below LOD	0.089	0.055	0.32	0.15	0.179	0.05	2.15	0.38	0.69	0.12	10.8	0.8	4.47	0.39	22.1	1.5	4.82	0.35	46.5	3	10.44	0.69	9310	400	0.335	0.081
MC13ST-1_4	26.015	154	61	Below LOD	Below LOD	271	19	2.94	0.67	0.25	0.079	231	12	491000	29000	1.04	0.17	Below LOD	Below LOD	1.23	0.15	0.0085	0.0049	0.14	0.07	0.37	0.12	0.271	0.051	4.46	0.48	1.59	0.19	19.3	1.2	7.48	0.6	35.4	2.3	7.46	0.52	67.6	4.1	14.28	0.94	9390	700	0.382	0.083
MC13ST-1_5	26.014	230	100	Below LOD	Below LOD	244	13	2.4	1.1	0.208	0.083	206	13	472000	30000	0.9	0.21	0.026	0.012	1.05	0.22	Below LOD	Below LOD	0.129	0.078	0.45	0.19	0.217	0.065	3.21	0.6	0.94	0.16	17.3	1.9	6.5	0.66	34.5	3	7.25	0.81	68.1	6.1	15.3	1.4	9430	840	0.272	0.076
MC13ST-1_6	26.039	Below LOD	Below LOD	Below LOD	Below LOD	247	15	3.6	1.4	0.25	0.1	233	14	448000	26000	0.96	0.19	0.017	0.0098	1.2	0.21	Below LOD	Below LOD	0.22	0.11	0.61	0.24	0.416	0.092	4.51	0.71	1.44	0.21	20.5	1.7	7.43	0.64	38.3	3.6	7.64	0.75	73.5	7.5	15.5	1.6	7900	680	0.44	0.11
MC13ST-1_7	26.014	Below LOD	Below LOD	Below LOD	Below LOD	277	16	Below LOD	Below LOD	0.202	0.075	143.8	9.3	524000	32000	0.87	0.13	0.025	0.012	0.56	0.12	Below LOD	Below LOD	0.053	0.049	Below LOD	Below LOD	0.14	0.051	1.86	0.4	0.73	0.1	9.9	1	4.24	0.35	25.3	2.1	5.88	0.52	61	4.9	15.3	1.3	7240	570	0.094	0.041
MC13ST-1_8	26.014	Below LOD	Below LOD	Below LOD	Below LOD	264	12	3.2	1	0.21	0.085	158	14	505000	32000	0.82	0.18	Below LOD	Below LOD	1.22	0.22	0.0124	0.0077	0.155	0.083	0.36	0.16	0.183	0.051	2.61	0.49	0.83	0.14	13.8	1.9	5.13	0.52	25.6	2.7	5.43	0.53	50.1	4.7	10.3	1	9760	760	0.322	0.076
MC13ST-1_9	26.012	Below LOD	Below LOD	Below LOD	Below LOD	293	19	1.86	0.75	0.123	0.067	117.2	8.4	491000	37000	0.8	0.19	Below LOD	Below LOD	0.247	0.063	Below LOD	Below LOD	Below LOD	Below LOD	0.172	0.095	0.09	0.036	1.41	0.35	0.535	0.092	7.97	0.98	3.67	0.37	20	1.6	5.04	0.46	56.1	4.5	16.2	1.4	9610	690	0.236	0.062
MC13ST-2_1	26.02	Below LOD	Below LOD	Below LOD	Below LOD	5.7	1.7	16.1	2.6	0.083	0.069	Below LOD	Below LOD	Below LOD	Below LOD	Below LOD	Below LOD	0.154	0.085	0.36	0.24	0.041	0.025	0.079	0.098	Below LOD	Below LOD	Below LOD	Below LOD	Below LOD	Below LOD	Below LOD	Below LOD	Below LOD	Below LOD	Below LOD	Below LOD	Below LOD	Below LOD	Below LOD	Below LOD	Below LOD	Below LOD	Below LOD	Below LOD	Below LOD	Below LOD	Below LOD	Below LOD
MC13ST-2_2	26.076	1100	130	Below LOD	Below LOD	446	47	7	1.6	0.238	0.086	1119	75	433000	24000	2.96	0.38	0.036	0.01	0.78	0.13	0.045	0.014	0.81	0.22	4.17	0.51	0.74	0.14	40.5	4.6	16.3	1.3	160	10	38.6	2.9	125	12	17.8	2	128	13	23.7	2.5	11800	1300	3.13	0.42
MC13ST-2_3	26.105	671	75	Below LOD	Below LOD	417	35	3.6	1	0.169	0.07	529	33	460000	25000	1.59	0.18	0.0245	0.0068	0.411	0.086	0.036	0.013	0.51	0.15	2.22	0.42	0.345	0.071	23.5	2.3	7.97	0.67	69	4.3	16.6	1.2	51.8	3.9	8.09	0.84	62.9	7.1	11	1.3	12900	1300	1.56	0.22
MC13ST-2_4	26.029	1080	130	Below LOD	Below LOD	446	46	6.4	1.8	0.24	0.1	1143	88	448000	37000	2.69	0.39	0.023	0.01	0.55	0.14	0.033	0.014	0.69	0.23	4.13	0.7	0.51	0.1	34.5	3.4	15.2	1.5	154	14	39	3.9	123	11	18.6	2.2	129	14	23.4	3	12700	1500	2.54	0.43
MC13ST-2_5	26.023	801	85	Below LOD	Below LOD	338	32	5.8	1.3	0.175	0.075	691	38	422000	28000	2.55	0.34	0.0067	0.0035	0.5	0.1	0.0195	0.0069	0.46	0.13	2.6	0.56	0.308	0.058	22	2.8	10.03	0.94	98.2	8.5	23.3	1.6	74.4	6	11.8	1.4	81	11	14	1.7	13400	1600	3.11	0.41
MC13ST-2_6	26.048	612	70	Below LOD	Below LOD	368	34	5.67	0.97	0.183	0.055	618	35	491000	33000	1.93	0.17	0.0152	0.0069	0.57	0.1	0.0179	0.0079	0.237	0.086	2.27	0.41	0.323	0.077	19.2	2	8.48	0.74	88.2	5.8	22.2	1.6	65	5.1	10.8	1.3	77	9.2	13.8	1.8	14600	1600	2.92	0.37
MC13ST-2_7	26.045	593	85	Below LOD	Below LOD	497	38	3.2	1.3	0.114	0.049	465	29	438000	27000	1.53	0.23	0.0062	0.0041	0.377	0.093	0.026	0.01	0.48	0.15	2.64	0.45	0.463	0.097	24.1	2.8	8.42	0.68	68.1	4.5	14.4	1.1	45.6	4.1	6.64	0.64	55.9	5.3	10.8	1.1	11600	1200	1.51	0.23
MC13ST-2_8	26.062	509	82	Below LOD	Below LOD	340	38	5.4	1	0.215	0.089	475	30	443000	34000	1.75	0.3	0.059	0.014	1.21	0.26	0.033	0.012	0.63	0.16	2.37	0.44	0.345	0.073	23.9	2.6	8.87	0.9	77.2	6	16.7	1.4	47.2	5.2	6.28	0.84	46.8	5.9	7.8	1	11700	1500	1.5	0.23
MC13ST-2_9	26.028	352	72	Below LOD	Below LOD	279	18	22.3	4.4	0.45	0.14	484	24	475000	18000	1.59	0.3	0.029	0.012	0.27	0.1	0.0166	0.0095	0.21	0.1	0.85	0.29	0.139	0.051	11	1.1	5.12	0.37	57.5	3.6	15.43	0.93	54.2	4	7.93	0.9	57.6	5.8	10.9	1.1	12160	970	1.23	0.16
MC13ST-2_10	26.008	1330	140	Below LOD	Below LOD	505	47	5.8	1.1	0.39	0.12	1619	87	446000	24000	3.24	0.42	0.073	0.017	0.74	0.13	0.061	0.018	0.97	0.25	5.59	0.64	0.89	0.15	48.2	4.5	20.7	1.6	223	16	54.6	4.3	180	15	27.6	2.5	208	24	35.3	3.8	14500	1700	4.28	0.59
MC13ST-2_11	26.004	697	76	Below LOD	Below LOD	364	37	4.8	1	0.203	0.07	690	46	474000	35000	2.22	0.29	0.007	0.0046	0.52	0.11	0.0194	0.0077	0.42	0.13	2.8	0.47	0.442	0.089	26.8	2.8	10.4	1.1	101.9	8.1	23.5	1.8	75	6.1	10.6	1	76.9	9.3	13.2	1.6	13500	1600	2.15	0.3
MC13ST-2_12	26.038	500	64	Below LOD	Below LOD	323	31	4.59	0.69	0.254	0.079	516	34	468000	36000	1.73	0.26	Below LOD	Below LOD	0.47	0.12	0.0153	0.0082	0.28	0.1	1.83	0.28	0.277	0.069	15.9	1.7	7.27	0.72	71.1	5.4	17.7	1.3	55.9	4.8	7.75	0.73	57.3	5.7	9.61	0.97	12600	1200	1.93	0.24
MC13ST-2_13	26.004	950	78	Below LOD	Below LOD	403	36	5.67	0.96	0.208	0.066	923	56	447000	26000	2.19	0.37	0.0114	0.0073	0.48	0.12	0.0211	0.0085	0.56	0.17	3.29	0.63	0.57	0.13	31.1	3.3	13.7	1.1	131.4	9.3	32.8	2.7	99.9	8.4	14.6	1.6	101.7	9.1	18.2	1.8	12200	1300	1.73	0.27
MC13ST-6_12rim	26.028	640	81	Below LOD	Below LOD	487	49	4.2	1.1	0.41	0.11	558	40	503000	35000	2.29	0.21	Below LOD	Below LOD	0.59	0.12	0.0092	0.0067	0.09	0.065	0.57	0.23	0.025	0.02	4.47	0.74	2.28	0.23	34.7	2.5	17	1.4	107	10	28.7	3.1	292	32	69.9	7.4	13300	1400	1.92	0.28
MC13ST-6_14rim	26.038	414	73	Below LOD	Below LOD	331	28	6.4	1.1	0.75	0.19	537	41	423000	29000	2.29	0.35	0.0216	0.0087	13	1.5	0.038	0.012	0.44	0.16	2.25	0.5	0.87	0.19	10.2	1.8	3.62	0.51	45.3	4.2	16.6	1.5	97.7	8.7	23.7	2.7	239	28	51.9	6.4	11100	1400	1.01	0.18
MC13ST-6_04rim	26.061	652	64	Below LOD	Below LOD	368	30	6	1.1	0.6	0.13	843	60	449000	35000	7.7	1	0.0037	0.0033	2.43	0.46	0.0138	0.0077	0.101	0.068	0.59	0.21	0.089	0.032	5.88	0.97	3.1	0.3	51.2	4.2	24	2.2	150	11	44.1	3.7	550	59	126	14	13900	1500	25.3	4.8
MC13ST-6_24rim	26.004	247	56	Below LOD	Below LOD	324	29	3.91	0.99	0.299	0.074	432	31	468000	35000	8.12	0.85	Below LOD	Below LOD	1.91	0.24	0.0104	0.0055	0.248	0.092	1.06	0.27	0.055	0.023	7.4	1	2.84	0.26	35.8	2.5	14.9	1.2	68.5	5.5	16.1	1.3	150	16	33.3	3.8	14400	1500	4.46	0.54
MC13ST-6_22rim	26.036	790	100	Below LOD	Below LOD	555	51	4.3	1	0.369	0.096	718	39	500000	33000	2.9	0.33	Below LOD	Below LOD	0.62	0.13	0.0079	0.0054	0.069	0.052	0.74	0.25	0.037	0.021	4.96	0.7	2.81	0.29	46.6	4	21.5	1.6	134	12	36.4	3.6	368	35	84.3	8.4	13900	1500	1.99	0.25
MC13ST-6_21rim	26.055	883	80	Below LOD	Below LOD	615	62	4.4	1	0.37	0.11	832	54	472000	38000	2.8	0.37	0.0086	0.0055	0.83	0.15	Below LOD	Below LOD	0.29	0.13	1.04	0.24	0.105	0.035	7.4	1.2	3.91	0.41	58	5	25.8	2	157	16	40.9	4.8	418	45	98	10	12700	1300	2.37	0.33
MC13ST-6_20rim	26.014	797	93	Below LOD	Below LOD	555	52	4.26	0.86	0.338	0.09	631	40	522000	34000	2.61	0.35	Below LOD	Below LOD	0.64	0.14	Below LOD	Below LOD	0.134	0.078	0.49	0.16	0.039	0.025	5.1	0.8	3.02	0.32	42.2	2.9	19.6	1.3	118.9	9.8	32.7	2.9	331	28	74	7.3	13300	1200	1.99	0.29
MC13ST-6_18rim	26.057	642	68	Below LOD	Below LOD	522	47	4.4	1	0.41	0.11	731	39	523000	34000	3.08	0.32	0.0036	0.0028	0.59	0.12	Below LOD	Below LOD	0.24	0.11	0.69	0.19	0.057	0.027	5.73	0.76	2.93	0.28	48.3	3	22.4	1.7	131	11	37.2	3.7	394	42	89.1	8.2	14200	1300	2.17	0.24
MC13ST-6_39rim	26.029	239	67	Below LOD	Below LOD	308	16	4.8	1.4	0.37	0.14	499	18	460000	19000	6.44	0.5	Below LOD	Below LOD	2.78	0.28	Below LOD	Below LOD	0.37	0.15	1.53	0.22	0.119	0.046	9.6	1.3	3.74	0.3	42	2.6	15.9	1.1	77.3	4.3	17.5	1.5	167	13	35.1	2.6	12300	940	2.69	0.34
MC13ST-6_44rim	26.035	185	53	Below LOD	Below LOD	321	22	4.51	0.96	0.226	0.086	522	25	491000	28000	6.23	0.6	Below LOD	Below LOD	2.86	0.27	0.0181	0.0079	0.57	0.13	1.68	0.28	0.161	0.045	11.37	0.94	4	0.36	47.8	3.1	16.71	0.97	83.8	5.9	17.1	1.2	151	11	32.8	2.6	12300	970	2.61	0.25
MC13ST-6_48rim	26.051	293	65	Below LOD	Below LOD	322	20	3.9	1.1	0.285	0.092	513	30	477000	32000	6.88	0.52	Below LOD	Below LOD	2.97	0.3	0.029	0.01	0.58	0.15	1.3	0.25	0.165	0.041	10.6	1	3.86	0.31	45.7	3	16.96	0.96	81.6	4.8	18.3	1.3	162	11	32.2	2.2	11880	850	2.98	0.31
MC13ST-6_50rim	26.137	205	58	Below LOD	Below LOD	283	17	2.03	0.85	0.218	0.074	364	15	463000	23000	6.2	0.5	Below LOD	Below LOD	3.04	0.32	0.0117	0.0064	0.38	0.12	1.38	0.33	0.113	0.037	8.98	0.89	3.07	0.28	33.6	2.1	12.04	0.67	58.7	4.2	12.48	0.87	105.7	7.5	21.9	1.5	11580	780	2.57	0.29
MC13ST-6_58rim	26.068	243	66	Below LOD	Below LOD	336	22	4	1	0.296	0.087	543	35	484000	27000	6.09	0.53	0.0086	0.0051	2.51	0.26	0.0229	0.009	0.41	0.14	1.57	0.33	0.191	0.063	9.6	1	4.08	0.36	47.5	4.4	18	1.4	88.3	6.6	19.7	1.7	178	18	37.3	2.8	12850	790	2.95	0.25
MC13ST-6_61rim	26.004	284	57	Below LOD	Below LOD	366	18	4.9	1.1	0.33	0.11	891	40	484000	23000	12.43	0.81	Below LOD	Below LOD	4.38	0.38	0.037	0.012	0.88	0.18	3.22	0.38	0.275	0.074	18.9	1.5	6.67	0.49	78.1	4.7	29.1	1.9	135.7	6.5	29.7	1.6	271	14	56.3	2.9	11230	610	4.4	0.39
MC13ST-6_66rim	26.166	165	68	Below LOD	Below LOD	309	19	3.7	1	0.217	0.082	540	27	496000	28000	6.59	0.62	Below LOD	Below LOD	3.09	0.34	0.024	0.01	0.59	0.16	1.67	0.3	0.118	0.043	12.3	1.3	4.43	0.36	50.6	3.4	18.4	1.3	81.2	4.3	17.4	1.1	159	11	31.6	1.7	12350	910	2.86	0.25
MC13ST-19_10rim	26.014	272	74	Below LOD	Below LOD	286	18	4.4	1.4	0.36	0.14	666	37	486000	33000	9.05	0.86	Below LOD	Below LOD	5.42	0.45	0.021	0.01	0.49	0.16	1.56	0.3	0.344	0.074	10.2	1.3	4.14	0.4	58.2	4.6	22.1	1.4	117.7	7.5	25.5	1.8	238	16	48.7	3.2	9760	820	2.77	0.31
MC13ST-19_17rim	26.01	320	210	Below LOD	Below LOD	293	32	Below LOD	Below LOD	0.54	0.23	594	57	454000	42000	10.5	1.3	Below LOD	Below LOD	3.78	0.56	Below LOD	Below LOD	0.34	0.22	1.12	0.42	0.23	0.11	7.7	1.5	3.27	0.54	49.7	6.1	20	2.4	101	11	23.7	3.1	207	25	41.5	4.6	11300	1200	5.99	0.92
MC13ST-19_21rim	26.013	185	68	Below LOD	Below LOD	286	22	2.4	1.3	0.3	0.12	700	54	473000	24000	6.92	0.65	Below LOD	Below LOD	3.65	0.42	0.018	0.01	0.47	0.18	1.84	0.43	0.196	0.055	11.6	1.5	4.87	0.47	60.8	5.2	24	1.9	122.8	9.4	25.7	2.3	233	19	50.1	4.2	10460	820	3.25	0.31
MC13ST-19_22rim	26.006	243	74	Below LOD	Below LOD	269	22	2.2	1.3	0.215	0.098	479	33	484000	44000	7.24	0.7	Below LOD	Below LOD	2.77	0.35	Below LOD	Below LOD	0.151	0.093	0.79	0.23	0.125	0.05	4.81	0.75	2.21	0.27	34.9	3.2	15.3	1.2	80.8	6	21.1	1.6	209	18	45.9	3.7	10800	1000	2.97	0.38
MC13ST-19_25rim	26.014	467	72	Below LOD	Below LOD	315	19	3.6	1.2	0.55	0.16	1193	63	460000	23000	23.6	1.5	Below LOD	Below LOD	7.58	0.75	0.036	0.012	0.92	0.25	2.47	0.41	0.304	0.067	18.1	1.8	6.96	0.67	96.2	6.4	39.1	2.2	203	13	44	3.3	398	29	80.2	5.3	11370	780	10.49	0.89
MC13ST-19_20rim	26.031	230	110	Below LOD	Below LOD	250	16	Below LOD	Below LOD	0.24	0.11	516	32	459000	34000	7.56	0.73	Below LOD	Below LOD	3.98	0.42	Below LOD	Below LOD	0.41	0.17	1.66	0.43	0.248	0.089	8.4	1.1	3.1	0.31	41.5	3.9	17.2	1.3	85.3	6.3	18	1.2	166	12	36	2.5	9130	570	2.59	0.37
MC13ST-19_29rim	26.238	210	110	Below LOD	Below LOD	266	25	Below LOD	Below LOD	0.52	0.16	652	56	436000	35000	11.4	1.2	Below LOD	Below LOD	4.06	0.56	Below LOD	Below LOD	0.3	0.18	0.94	0.38	0.135	0.065	9.7	1.7	3.6	0.47	53.7	5.7	19.6	2	107	10	24	2.4	218	23	45.7	5.2	10700	1100	5.91	0.69
MC13ST-19_41rim	26.006	Below LOD	Below LOD	Below LOD	Below LOD	213	19	Below LOD	Below LOD	0.33	0.16	480	51	388000	43000	6.1	1.2	Below LOD	Below LOD	3.28	0.61	Below LOD	Below LOD	0.39	0.22	0.64	0.49	0.3	0.2	5.8	1.6	2.42	0.54	35.4	4.6	14.3	2	82	10	16.8	2.3	182	18	38.4	5.3	8580	980	1.99	0.49
MC13ST-19_43rim	26.011	170	130	Below LOD	Below LOD	297	22	3.5	1.5	0.35	0.15	503	40	518000	36000	5.29	0.67	Below LOD	Below LOD	3.6	0.53	0.02	0.012	0.38	0.19	0.98	0.35	0.204	0.073	7.3	1.1	2.82	0.37	39.2	3.3	16.9	1.6	86.6	7.7	19.2	1.9	176	17	39	4.1	11700	1300	1.8	0.31
MC13ST-19_49core	26.029	326	62	Below LOD	Below LOD	284	16	2.35	0.81	0.27	0.089	874	50	451000	28000	6.69	0.63	0.0045	0.0035	4.43	0.4	0.028	0.011	0.73	0.19	3.06	0.46	0.478	0.092	16.1	1.5	5.77	0.52	75.8	4.8	29.3	1.7	144.8	8.9	30.4	2.1	274	20	57.9	4.1	10100	880	2.52	0.33
MC13ST-19_62core	26.032	413	80	Below LOD	Below LOD	307	18	3.3	1	0.29	0.1	1019	51	468000	25000	18.2	1.3	Below LOD	Below LOD	6.01	0.52	0.033	0.011	0.75	0.19	2.42	0.41	0.111	0.037	14.9	1	6.34	0.54	87.3	5.9	35	2.8	169	11	38.2	2.6	371	27	72.5	5	10990	780	6.66	0.6
MC13ST-19_66core	26.016	355	57	Below LOD	Below LOD	318	20	2.3	0.76	0.434	0.098	1042	55	482000	25000	16.9	1.1	Below LOD	Below LOD	4.79	0.48	0.0227	0.0078	0.47	0.11	1.82	0.29	0.221	0.051	16.2	1.8	6.04	0.57	86.3	6.6	33.7	2.1	171	12	37.5	2.8	357	29	73.6	5.2	11080	960	9.7	1.1
MC13ST-2fine_2	26.034	469	58	Below LOD	Below LOD	398	41	6.26	0.94	0.189	0.068	668	44	490000	37000	1.78	0.18	Below LOD	Below LOD	0.51	0.11	0.033	0.01	0.69	0.2	3.64	0.64	0.55	0.1	32.7	3.6	12.3	1.2	105	9	23.7	2	70.5	7.2	10.2	1.3	70.2	8	12.6	1.6	13700	1800	1.51	0.22
MC13ST-2fine_3	26.037	1470	110	Below LOD	Below LOD	626	49	2.6	0.83	0.42	0.11	2010	160	458000	38000	3.14	0.39	0.0017	0.0024	0.331	0.091	Below LOD	Below LOD	0.107	0.075	1.3	0.26	0.288	0.082	13.4	1.4	8.04	0.77	147	11	58	4.2	292	26	62.3	6.7	591	71	124	15	11700	1300	5.06	0.67
MC13ST-2fine_1	26.008	466	77	Below LOD	Below LOD	299	21	4	1.3	0.109	0.058	279	13	502000	24000	1.29	0.21	Below LOD	Below LOD	0.41	0.11	0.0145	0.0088	0.49	0.19	2.35	0.5	0.333	0.091	17.7	1.8	6.43	0.49	48	3.1	9.04	0.77	22.2	1.6	2.76	0.36	18.1	2.3	2.38	0.37	13000	1400	0.7	0.14
MC13ST-2fine_8	26.028	643	70	Below LOD	Below LOD	357	33	5.13	0.96	0.258	0.075	839	58	504000	29000	1.85	0.24	Below LOD	Below LOD	0.44	0.092	0.0223	0.0091	0.45	0.14	2.69	0.53	0.4	0.077	26.9	2.8	11.7	1.1	117.8	8.7	29.4	2.2	86.9	7.4	12.7	1.3	94	11	16.4	1.9	14600	1800	2.29	0.32
MC13ST-2fine_7	26.027	559	53	Below LOD	Below LOD	362	30	4.88	0.96	0.237	0.077	731	45	456000	34000	2	0.27	Below LOD	Below LOD	0.46	0.11	0.0212	0.0069	0.5	0.13	3.06	0.46	0.508	0.085	27.1	2.6	11.11	0.99	105.3	6.7	24.8	2.1	74.8	7.2	10.14	0.97	72.9	7.3	12.4	1.2	12500	1300	1.8	0.22
MC13ST-2fine_6	26.017	490	44	Below LOD	Below LOD	357	28	6.36	0.95	0.336	0.096	640	37	496000	26000	3.25	0.46	0.0229	0.0087	1.49	0.27	0.057	0.013	0.71	0.18	2.23	0.43	0.41	0.075	20	2.6	7.15	0.76	72.1	6.3	21.3	1.4	91.9	8.1	19.6	2.5	196	28	44.6	6.4	13200	1400	2.15	0.29
MC13ST-2fine_5	26.047	457	85	Below LOD	Below LOD	324	30	4.5	1.2	0.204	0.08	467	34	488000	31000	1.68	0.29	Below LOD	Below LOD	0.38	0.1	0.0096	0.0064	0.24	0.099	1.7	0.35	0.241	0.07	17.4	2	6.78	0.72	67.1	6.3	15.8	1.4	48.2	4.2	7.42	0.84	50.9	5.4	9.6	1	14100	1700	1.57	0.23
MC13ST-2fine_4	26.009	409	56	Below LOD	Below LOD	315	21	3.7	1.1	0.29	0.087	395	19	474000	30000	1.53	0.24	Below LOD	Below LOD	0.268	0.071	0.0072	0.005	0.32	0.11	1.14	0.23	0.209	0.059	11.6	1.1	5.5	0.43	54.4	3.3	13.7	1.1	44.2	3.5	7.58	0.75	59.8	5.9	12	1.4	13600	1300	1.52	0.19
MC13ST-2fine_10	26.04	527	49	Below LOD	Below LOD	371	22	5.35	0.95	0.22	0.063	712	37	500000	31000	2.03	0.27	Below LOD	Below LOD	0.414	0.091	0.0172	0.007	0.39	0.11	2.3	0.36	0.344	0.058	22.1	1.6	9.78	0.7	98.3	5.9	22.6	1.4	74.3	5.4	10.73	0.8	73.4	5.3	12.86	0.77	14010	880	2.24	0.2
MC13ST-2fine_9	26.012	Below LOD	Below LOD	Below LOD	Below LOD	300	26	5.7	1.1	0.21	0.078	249	18	487000	41000	2.18	0.29	0.035	0.011	1.01	0.12	0.041	0.012	0.206	0.092	0.52	0.19	0.096	0.036	5.03	0.78	2.11	0.26	24.9	2.3	7.44	0.55	30.6	2.9	5.41	0.6	52.4	6.6	11.1	1.3	13900	1400	1.47	0.21
MC13ST-2fine_11	26.122	256	41	Below LOD	Below LOD	282	17	3.23	0.78	0.23	0.088	289	13	492000	26000	0.9	0.15	0.0119	0.0064	0.38	0.1	0.028	0.013	0.31	0.1	0.9	0.19	0.124	0.038	8.57	0.87	3.33	0.29	33.5	2.3	9.43	0.57	32.8	2.1	5.41	0.42	40	3.2	8.11	0.74	13700	1200	0.58	0.11
MC13ST-17_29	26.042	143	55	Below LOD	Below LOD	295	26	6.4	1.2	0.207	0.083	405	19	483000	23000	2.04	0.23	0.039	0.012	11.62	0.99	0.328	0.041	3.75	0.56	3.97	0.56	1.73	0.18	12.1	1.4	3.28	0.25	36	2.3	13.05	0.8	62.2	5	13	1.1	120	12	26.1	2.5	8540	850	1.04	0.18
MC13ST-17_25	26.013	184	51	Below LOD	Below LOD	300	21	9.1	1.2	0.139	0.057	235	12	502000	24000	2.04	0.24	0.0065	0.0035	7.4	0.6	0.043	0.011	0.99	0.23	1.55	0.33	0.726	0.09	5.14	0.74	1.51	0.17	18.7	1.6	7.33	0.58	37.5	2.8	7.97	0.77	81.1	7.1	19	2	6720	570	0.92	0.13
MC13ST-17_26	26.056	169	59	Below LOD	Below LOD	268	16	7.5	1.2	0.156	0.061	185	8	486000	24000	2.16	0.32	Below LOD	Below LOD	6.68	0.69	0.038	0.013	0.67	0.17	0.96	0.2	0.535	0.098	4.33	0.54	1.19	0.17	15.6	1.4	5.99	0.57	27.2	2.1	6.25	0.6	60.9	5.4	14.8	1.5	7190	710	0.72	0.13
MC13ST-17_27	26.011	290	45	Below LOD	Below LOD	342	22	9.2	1.1	0.241	0.071	420	16	516000	23000	3.74	0.34	0.0089	0.0038	11.09	0.77	0.099	0.019	1.3	0.24	1.97	0.32	1.03	0.13	7.8	0.69	2.4	0.18	31.6	1.7	12.86	0.57	69.2	3.7	15.24	0.86	152	11	35.2	2.8	8750	670	1.37	0.16
MC13ST-17_22	26.012	219	50	Below LOD	Below LOD	279	17	10.8	1.3	0.148	0.064	531	22	488000	21000	2.37	0.26	0.065	0.012	12.49	0.95	0.393	0.035	4.39	0.44	4.45	0.53	2.12	0.2	15.5	1.4	4.39	0.33	47.7	2.7	17	1	80.7	5.5	15.8	1.2	151	12	33.2	2.9	7620	660	1.22	0.21
MC13ST-17_21	26.019	203	48	Below LOD	Below LOD	326	23	5.9	1.2	0.127	0.056	335	11	498000	19000	3.37	0.39	0.0077	0.004	10.44	0.8	0.071	0.015	0.81	0.17	1.51	0.33	0.717	0.085	5.78	0.77	2.1	0.22	23.54	0.97	10.4	0.59	54.6	4	12.73	0.97	133	13	31.9	3	9230	760	1.39	0.19
MC13ST-17_17	26.007	234	35	Below LOD	Below LOD	349	23	10.6	1.2	0.256	0.064	430	16	534000	19000	3.82	0.35	0.0121	0.0056	11.5	0.83	0.092	0.017	1.44	0.23	1.91	0.27	1.02	0.1	7.85	0.83	2.45	0.19	31.6	1.7	13.06	0.75	74.7	5.3	15.8	1.1	162	12	39.4	3.2	9500	790	1.39	0.15
MC13ST-17_16	26.02	173	39	Below LOD	Below LOD	311	24	9	1.1	0.191	0.074	419	18	526000	23000	1.7	0.19	0.0363	0.008	11.19	0.91	0.305	0.034	4.2	0.59	4.13	0.54	2	0.22	13.2	1.3	3.51	0.34	38.3	2.1	13.29	0.73	63.7	4.8	12.8	1.1	119	12	25.6	2.2	8980	790	0.75	0.12
MC13ST-17_19	26.07	197	78	Below LOD	Below LOD	294	24	8	1.4	0.169	0.066	440	25	468000	25000	2.1	0.26	0.072	0.014	11.07	0.99	0.37	0.037	4.24	0.6	4.17	0.59	1.98	0.26	14.2	1.5	3.96	0.37	41.6	3.2	14.4	1.1	67.8	5.8	14	1.2	128	12	29.3	3.1	6860	630	0.9	0.16
MC13ST-17_18	26.133	104	39	Below LOD	Below LOD	309	21	11.2	1.1	0.34	0.13	361	25	521000	21000	1.72	0.17	0.0204	0.0065	10.13	0.93	0.244	0.035	2.92	0.47	4.06	0.58	1.75	0.21	11.2	1.2	3.1	0.3	33.3	2.8	11.36	0.93	52.8	4.3	11.2	1.2	104	11	22.8	2.2	9060	810	0.72	0.14
MC13ST-17_20	26.014	177	43	Below LOD	Below LOD	297	20	6.9	1.2	0.177	0.064	253.5	9.8	501000	24000	2.77	0.28	0.0067	0.0043	8.45	0.75	0.054	0.012	0.89	0.19	1.4	0.28	0.82	0.14	5.86	0.89	1.71	0.21	19.9	1.5	8.34	0.57	41.9	3	9.34	0.74	91.3	7.6	23.1	2	8990	780	1.26	0.22
MC13ST-17_11	26.03	260	51	Below LOD	Below LOD	311	17	9.2	1.1	0.185	0.068	340	15	507000	21000	2.76	0.28	0.0048	0.0031	9.4	0.79	0.071	0.015	1.04	0.2	1.51	0.25	0.86	0.12	5.53	0.64	1.87	0.2	23.2	1.8	9.72	0.67	55.5	3.5	13.02	0.88	127	9.2	30.5	2.7	9080	710	1.13	0.16
MC13ST-17_12	26.038	175	58	Below LOD	Below LOD	298	21	7.6	1.4	0.204	0.065	226.1	8.7	508000	26000	2.43	0.31	0.0087	0.005	7.28	0.63	0.05	0.014	0.89	0.18	1.39	0.2	0.79	0.12	5.35	0.64	1.53	0.19	17.8	1.3	6.71	0.53	36.8	2.8	8.15	0.68	83.4	7.6	19.9	1.5	8770	750	0.91	0.13
MC13ST-17_13	26.04	327	56	Below LOD	Below LOD	354	25	16.8	1.9	0.25	0.081	918	48	513000	27000	5.09	0.48	0.138	0.017	22.2	1.8	0.633	0.054	7.95	0.79	8.72	0.96	4.71	0.51	33.6	3.1	9.14	0.72	90.6	5.1	31.1	1.9	131.4	9.1	25.7	2.2	237	21	48.9	4.1	8200	830	1.66	0.23
MC13ST-17_08	26.078	281	44	Below LOD	Below LOD	369	32	16.7	1.6	0.302	0.094	800	53	524000	25000	4.72	0.47	0.14	0.025	18.4	1.5	0.543	0.045	6.46	0.7	7.28	0.88	3.69	0.4	30.2	2.9	7.92	0.73	80.4	6.3	28.1	1.9	122	11	23.7	2.1	203	16	43.2	3.5	7850	650	1.84	0.22
MC13ST-17_07	26.011	187	48	Below LOD	Below LOD	292	21	7.84	0.81	0.171	0.054	389	17	496000	26000	1.57	0.2	0.0351	0.0092	11	1	0.288	0.033	3.78	0.49	3.37	0.41	1.8	0.22	12.9	1.4	3.64	0.3	36	2.5	12.48	0.67	58.1	3.4	12.1	0.95	108.7	8.2	24.2	2.1	8550	770	0.65	0.13
MC13ST-17_09	26.037	154	51	Below LOD	Below LOD	281	21	6.5	1.1	0.159	0.062	323	14	491000	25000	1.51	0.24	0.0098	0.0042	9.3	0.72	0.126	0.022	2.03	0.36	3.34	0.38	1.55	0.18	10.4	1	2.92	0.26	30.9	2.1	10.27	0.69	47.6	3.5	9.98	0.83	89.2	8.1	19.6	1.8	9210	840	0.59	0.1
MC13ST-17_10	26.037	456	54	Below LOD	Below LOD	383	26	22.2	2	0.248	0.085	831	44	508000	18000	7.54	0.48	0.0191	0.0057	16.7	1.4	0.157	0.022	1.84	0.3	2.75	0.37	1.53	0.16	14.8	1.4	4.91	0.45	67.5	3.9	26.1	1.5	132.2	9.1	27.7	2.6	244	23	55.6	4.8	6970	590	2.3	0.21
MC13ST-17_05	26.011	Below LOD	Below LOD	Below LOD	Below LOD	239	15	Below LOD	Below LOD	0.162	0.067	50.5	2.2	475000	24000	0.61	0.15	Below LOD	Below LOD	2.47	0.27	0.0041	0.0037	0.071	0.051	0.13	0.11	0.061	0.027	0.89	0.23	0.243	0.058	3.88	0.58	1.48	0.2	8.76	0.85	2.11	0.21	20.8	1.6	5.97	0.59	8400	590	0.225	0.063
MC13ST-17_04	26.106	217	48	Below LOD	Below LOD	310	20	11.1	1.3	0.196	0.074	882	34	511000	21000	4.33	0.45	0.116	0.016	15.1	1.2	0.483	0.05	4.86	0.65	5.76	0.69	2.78	0.29	23	2	6.54	0.52	80.5	4.3	30.1	1.7	140.4	8.4	28.4	2.4	243	20	52.3	4	7370	740	1.92	0.25
MC13ST-14_01	26.017	249	43	Below LOD	Below LOD	281	14	3.9	0.81	0.353	0.089	1677	71	466000	22000	43	2.1	Below LOD	Below LOD	26.8	1.3	0.057	0.013	1.36	0.2	4.97	0.45	3.11	0.25	37.4	2.2	12.95	0.72	156.8	6.8	55.7	2.2	259.2	9.5	50.5	2.8	431	22	86.9	4.7	7900	430	8.57	0.55
MC13ST-14_07	26.048	Below LOD	Below LOD	Below LOD	Below LOD	226	12	2.94	0.87	0.283	0.068	505	27	475000	30000	22.7	1.8	Below LOD	Below LOD	12.29	0.71	0.039	0.012	0.57	0.13	1.59	0.31	0.113	0.036	10.24	0.92	3.76	0.26	48.3	3.1	16.9	1.1	83	5.2	16.7	1.2	135	7.4	27.1	1.9	9590	690	6.26	0.46
MC13ST-14_13	26.013	940	65	Below LOD	Below LOD	354	15	3.9	1.1	0.78	0.18	3530	140	444000	20000	148.2	6.7	1.29	0.3	29.1	2.1	1.14	0.25	7.8	1.7	11.5	1.5	3.91	0.49	65.3	4.7	24.8	1.3	321	15	118	5.3	559	26	115.5	5.3	1017	51	200	11	13580	760	39.1	2.2
MC13ST-14_15	26.158	506	69	Below LOD	Below LOD	288	16	2.37	0.97	0.89	0.16	3090	170	481000	26000	32.7	1.9	0.46	0.14	22.7	1.5	0.393	0.092	4.52	0.65	10.2	1.2	4.92	0.46	64	5.6	22.1	1.4	268	17	100.5	5.2	458	29	94.5	6.1	811	49	166.5	8.3	8490	430	6.38	0.52
MC13ST-14_17	26.028	Below LOD	Below LOD	Below LOD	Below LOD	Below LOD	Below LOD	Below LOD	Below LOD	Below LOD	Below LOD	180	320	27000	52000	21	22	0.5	1	Below LOD	Below LOD	Below LOD	Below LOD	Below LOD	Below LOD	Below LOD	Below LOD	Below LOD	Below LOD	Below LOD	Below LOD	Below LOD	Below LOD	31	61	17	19	23	45	3.7	7.4	90	120	6	11	1300	2400	1.7	3.4
MC13ST-14_22core	26.055	204	40	Below LOD	Below LOD	387	19	10.9	1.1	0.327	0.083	1123	63	540000	24000	3.04	0.32	0.0039	0.0029	21.1	1.5	0.077	0.014	1.6	0.23	3.75	0.41	2.43	0.21	25.5	1.9	8.77	0.53	102	6.2	38	2.2	177	8.9	36.9	2	310	18	65.1	3.1	8150	400	0.752	0.089
MC13ST-14_22rim	26.007	894	81	Below LOD	Below LOD	434	27	5.94	0.91	0.83	0.17	5030	330	476000	33000	68.7	4.9	0.15	0.047	44.5	3.6	0.18	0.027	3.35	0.45	11.99	0.86	4.78	0.41	96.3	6.6	36.9	2.4	455	29	163	10	728	45	145.9	9.8	1216	84	225	16	10390	860	15.4	1.3
MC13ST-14_26	26.034	236	63	Below LOD	Below LOD	264	14	2.63	0.94	0.45	0.12	1694	81	510000	26000	58.4	3.1	Below LOD	Below LOD	18.9	1.2	0.029	0.012	0.79	0.2	3.66	0.46	1.73	0.2	32.5	2.5	11.95	0.88	153.2	9.3	56.9	3.1	280	16	60.1	4	517	35	112.4	7.5	9560	590	13.3	0.85
MC13ST-14_28	26.037	301	40	Below LOD	Below LOD	276	13	3.99	0.83	0.58	0.12	2660	110	521000	23000	107.7	5.6	Below LOD	Below LOD	34.6	2.2	0.044	0.013	1.13	0.25	5.52	0.52	2.69	0.22	46.4	3.1	18.6	1	239	13	90.3	4.2	434	25	91.8	5.7	820	49	172.8	9.2	10560	600	27.7	1.8
MC13ST-14_29	26.086	473	43	Below LOD	Below LOD	311	14	3.93	0.83	0.64	0.13	3110	150	493000	22000	49	2.5	0.0038	0.0029	29.2	1.6	0.068	0.015	1.64	0.25	6.77	0.67	3.13	0.27	49.9	3.1	19.53	0.91	253	9.4	102.4	3.9	483	19	99.7	4.8	886	42	186.1	7.9	7710	400	9.83	0.72
MC13ST-14_36	26.17	383	46	Below LOD	Below LOD	465	25	11.3	1.3	0.47	0.12	2220	160	472000	22000	5.21	0.6	0.0196	0.0063	44.7	3.8	0.212	0.028	4.31	0.58	10.3	1.1	5.91	0.67	60.3	6	17.8	1.7	205	14	76.3	5.6	344	23	68.7	4.4	563	36	118.6	6.5	7290	450	1.27	0.18
MC13ST-14_37	26.065	223	40	Below LOD	Below LOD	244	15	2.78	0.82	0.267	0.096	508	34	468000	25000	8.35	0.7	Below LOD	Below LOD	9.53	0.73	0.0103	0.0061	0.28	0.12	1.07	0.24	0.244	0.062	6.79	0.8	2.71	0.3	37.5	2.9	15.6	1.1	82.2	6.2	18.8	1.4	182	15	38.5	2.9	10320	710	4.34	0.4
MC13ST-14_41rim	26.018	216	65	Below LOD	Below LOD	295	16	2.8	1.3	0.21	0.096	814	73	513000	24000	14.6	2.1	Below LOD	Below LOD	24.4	3.5	0.039	0.014	1.12	0.28	3.23	0.67	1.91	0.33	21.8	3.2	6.41	0.82	77.4	8.3	27.8	3	133	14	26.2	2.7	226	21	46.9	4.3	9170	640	2.96	0.31
MC14ST-25_02	26.289	710	49	Below LOD	Below LOD	359	22	1.56	0.59	0.68	0.14	3570	180	519000	26000	42.4	2	Below LOD	Below LOD	27.6	1.6	0.022	0.01	0.69	0.18	4.37	0.54	1.08	0.12	44.3	3.4	21.2	1.1	294	15	114.1	5.4	544	30	115.7	6.8	974	62	181	11	16800	1200	12.7	1
MC14ST-25_11out	26.007	Below LOD	Below LOD	Below LOD	Below LOD	345	19	2.15	0.65	0.279	0.081	449	20	510000	25000	6.21	0.42	Below LOD	Below LOD	18.2	1.1	0.0159	0.0069	0.275	0.096	1.04	0.21	0.534	0.085	6	0.61	2.06	0.18	29.4	1.6	11.97	0.76	69.7	3.9	17.9	1	188	11	47.5	2.7	12520	790	1.26	0.13
MC14ST-25_16	26.022	1193	61	Below LOD	Below LOD	346	24	1.62	0.64	0.71	0.13	3140	200	451000	30000	93.4	6	0.042	0.013	25.9	1.9	0.046	0.014	0.57	0.15	3.35	0.47	0.641	0.095	29.3	2.2	15.6	1.1	243	16	100.4	6.6	504	35	116.1	8.5	1000	75	190	15	17500	1500	32.8	2.9
MC14ST-25_17out	26.058	755	66	Below LOD	Below LOD	426	24	8.3	1	0.99	0.25	3590	240	541000	29000	76.7	4.4	0.039	0.015	106	8.3	0.208	0.03	3.5	0.42	10.8	1	5.7	0.48	62	4.2	22.8	1.9	289	23	111.7	7.2	571	40	123.3	8.8	1120	81	220	15	10320	690	16.3	1.4
MC14ST-25_26	26.005	Below LOD	Below LOD	Below LOD	Below LOD	277	22	2.36	0.69	0.231	0.075	234	11	530000	23000	1.97	0.23	0.012	0.0092	21.4	1.6	0.04	0.011	0.44	0.16	0.83	0.19	0.409	0.075	4.98	0.66	1.38	0.15	17	1.3	6.83	0.57	35.3	3	8.8	0.82	94.4	8.8	25.1	2.5	12800	1300	0.56	0.11
MC14ST-25_27	26.005	1807	85	Below LOD	Below LOD	669	42	7	1	0.56	0.12	2970	110	479000	16000	13.45	0.93	Below LOD	Below LOD	2.2	0.29	0.063	0.014	1.26	0.24	5.87	0.77	0.474	0.076	44.2	3	19.3	1.1	242	11	89.2	4.6	417	27	90	6.9	793	69	164	13	12000	1000	5.53	0.54
MC14ST-19_01	26.293	410	120	Below LOD	Below LOD	308	19	3.51	0.79	0.47	0.12	637	38	546000	40000	5.28	0.49	0.55	0.37	28.1	1.7	0.101	0.047	1.03	0.24	1.76	0.3	0.69	0.1	10.07	0.93	3.7	0.35	48.6	3.6	19.4	1.1	105.4	6.8	22.9	1.3	242	15	58.1	4.3	12380	870	2.01	0.22
MC14ST-19_03	26.037	700	250	Below LOD	Below LOD	286	17	3.9	0.8	0.81	0.25	652	79	527000	36000	2.72	0.32	0.82	0.37	25.3	2.3	0.37	0.11	2.73	0.72	3.22	0.8	1.02	0.25	12.8	2.7	4.44	0.89	54	7.9	19.3	2.4	106	13	23.8	2.7	236	25	52.7	4.8	11830	710	1.37	0.17
MC14ST-19_06	26.101	Below LOD	Below LOD	Below LOD	Below LOD	279	22	Below LOD	Below LOD	0.34	0.11	298	20	488000	35000	2.16	0.28	0.025	0.012	13.9	1.4	0.0201	0.009	0.37	0.12	0.94	0.24	0.294	0.08	3.52	0.65	1.35	0.18	19.7	1.8	7.93	0.76	47.4	3.6	11.7	1.1	135	12	33.9	2.5	11400	1000	1.02	0.17
MC14ST-19_11out	26.009	Below LOD	Below LOD	Below LOD	Below LOD	287	18	5.1	1	0.322	0.091	623	40	516000	33000	3.3	0.42	0.043	0.011	24	1.9	0.083	0.021	1.26	0.25	2.54	0.51	0.98	0.12	12.6	1.3	3.94	0.33	50.1	4.3	19.9	1.4	98.8	6.3	21.8	1.6	213	15	45.7	2.9	11830	860	1.55	0.16
MC14ST-19_10	26.013	Below LOD	Below LOD	Below LOD	Below LOD	293	21	3.5	1	0.286	0.092	565	36	537000	28000	3.86	0.37	0.0144	0.0061	23.9	1.9	0.042	0.012	0.78	0.19	1.71	0.32	0.67	0.12	9.1	1.1	3.38	0.36	40.8	3.5	16.9	1.2	88.2	5.6	18.8	1.2	220	18	47.1	3.2	12320	850	1.37	0.14
MC14ST-19_19	26.013	260	54	Below LOD	Below LOD	301	23	4.79	0.85	0.209	0.089	594	27	502000	25000	2.45	0.26	0.0215	0.0084	15.2	1.2	0.069	0.019	1.03	0.18	2.05	0.34	0.8	0.13	12.2	1.1	4.11	0.4	47.3	3.6	18.8	1.3	91.9	5.8	20.1	1.4	203	17	43.9	3.3	10320	890	1.19	0.18
MC14ST-19_17	26.005	Below LOD	Below LOD	Below LOD	Below LOD	310	20	Below LOD	Below LOD	0.36	0.1	326	22	556000	29000	1.09	0.16	Below LOD	Below LOD	11.84	0.93	0.0141	0.0065	0.181	0.069	0.59	0.19	0.389	0.091	3	0.42	1.41	0.14	19.4	1.5	8.27	0.6	48.4	3.6	12.16	0.98	150	11	39.8	3	14040	920	0.352	0.062
MC14ST-19_21	26.011	Below LOD	Below LOD	Below LOD	Below LOD	310	17	Below LOD	Below LOD	0.32	0.1	719	70	516000	30000	3.05	0.36	0.0021	0.0023	26.5	2.2	0.085	0.021	1.45	0.29	2.66	0.51	0.97	0.18	14	2.1	4.39	0.67	58	6.4	21.2	2	108	10	25.4	2.5	273	26	62.9	5.3	12570	850	1.42	0.16
MC14ST-19_22	26.046	Below LOD	Below LOD	Below LOD	Below LOD	301	19	Below LOD	Below LOD	0.29	0.1	590	39	519000	30000	4.58	0.5	0.0097	0.005	26.9	2.3	0.053	0.014	0.9	0.17	2.26	0.37	0.78	0.12	11	1	4.01	0.39	47.9	3	18.4	1.5	92.8	6.1	19.9	1.3	207	17	41.7	2.8	12040	920	1.8	0.19
MC14ST-19_23	26.049	1720	800	2800	1500	276	19	3.5	1.1	5.5	3	736	44	513000	33000	4.11	0.5	7.9	4.6	38.6	8.2	2.1	1.2	9.2	4.6	3.92	0.92	1.03	0.15	15.1	1.7	4.58	0.42	58.5	4.5	22.9	1.8	111.9	7.6	24.3	1.9	248	20	50.5	3.9	10800	860	1.69	0.21
MC14ST-19_24	26.031	4400	1200	8000	2200	270	18	3.3	1.1	12	3.2	697	42	473000	34000	3.34	0.41	20	5.5	65	12	5.8	1.6	23.7	5.9	6.6	1.3	1.71	0.23	18.9	1.9	5.2	0.49	56.7	4.3	20.6	1.4	105.3	7	22.9	1.6	219	16	48.7	4	9900	760	1.42	0.19
MC14ST-19_25	26.022	235	55	Below LOD	Below LOD	325	24	3.8	1.5	0.37	0.15	1350	220	495000	36000	10	2	0.0246	0.0085	35.1	4.8	0.105	0.034	1.91	0.43	5	1	1.44	0.26	30.3	6.1	10.2	1.9	127	24	46.6	9	224	42	44	7.5	407	64	86	14	11200	1000	3.1	0.62
MC14ST-19_29	26.036	Below LOD	Below LOD	Below LOD	Below LOD	324	22	Below LOD	Below LOD	0.256	0.073	432	31	550000	33000	2.51	0.28	0.0033	0.0026	15.1	1.1	0.047	0.015	0.43	0.14	1.19	0.24	0.55	0.12	7.1	1.1	2.24	0.25	30.3	2.9	12.7	1.2	68.9	5.1	16.8	1.1	194	14	48.1	3.6	13370	950	1	0.15
MC14ST-19_34	26.011	Below LOD	Below LOD	Below LOD	Below LOD	277	23	Below LOD	Below LOD	0.43	0.18	365	26	491000	32000	2.95	0.42	1	0.42	23.8	2.3	0.137	0.06	1.1	0.4	1.33	0.35	0.372	0.095	6.96	0.95	2.34	0.3	28.9	3.3	11	1.2	57.2	4.6	13.5	1.3	146	11	33.6	2.5	11900	1200	1.33	0.2
MC14ST-19_35out	26.006	Below LOD	Below LOD	Below LOD	Below LOD	241	12	Below LOD	Below LOD	0.32	0.15	238	11	509000	22000	2.41	0.37	0.0062	0.0057	2.12	0.4	Below LOD	Below LOD	Below LOD	Below LOD	Below LOD	Below LOD	0.171	0.076	2.48	0.63	0.99	0.23	13.9	1.7	5.9	0.67	39.3	3.5	10.59	0.99	129.1	9	33.6	1.9	13210	790	1.96	0.32
MC14ST-19_37	26.026	374	53	Below LOD	Below LOD	313	17	3.3	1	0.36	0.12	2150	140	514000	31000	5.09	0.54	0.104	0.022	48	4	0.681	0.071	9.54	0.99	16.3	1.6	4.55	0.42	64.8	5.8	18.8	1.2	215	17	69.5	4.8	319	25	59.6	4.1	543	42	110.3	7.5	10370	790	1.77	0.24
MC13ST-18_07core	26.03	Below LOD	Below LOD	Below LOD	Below LOD	Below LOD	Below LOD	Below LOD	Below LOD	Below LOD	Below LOD	Below LOD	Below LOD	230	140	Below LOD	Below LOD	Below LOD	Below LOD	Below LOD	Below LOD	Below LOD	Below LOD	Below LOD	Below LOD	Below LOD	Below LOD	Below LOD	Below LOD	Below LOD	Below LOD	Below LOD	Below LOD	Below LOD	Below LOD	Below LOD	Below LOD	Below LOD	Below LOD	Below LOD	Below LOD	Below LOD	Below LOD	Below LOD	Below LOD	Below LOD	Below LOD	Below LOD	Below LOD
MC13ST-18_08	26.042	204	44	Below LOD	Below LOD	311	16	3.6	1.1	0.193	0.073	380	19	523000	28000	5.17	0.35	Below LOD	Below LOD	4	0.37	0.0326	0.0089	0.76	0.17	2.14	0.35	0.296	0.067	11.8	1.1	3.31	0.32	38.7	2.6	12.82	0.74	54.7	3.4	11.61	0.76	103	6.8	20.8	1.3	11910	970	2.28	0.27
MC13ST-18_06core	26.013	140	45	Below LOD	Below LOD	290	22	4.5	1	0.22	0.074	347	28	517000	36000	3.14	0.4	0.071	0.021	20.6	2.8	0.451	0.09	6	1.3	6.1	1.5	2.7	0.63	17.1	2.9	3.89	0.51	39.2	4.9	12	1.3	49.5	4.2	9.63	0.95	89	8.6	18.4	1.8	10470	930	1.17	0.15
MC13ST-18_10	26.045	532	56	Below LOD	Below LOD	317	18	Below LOD	Below LOD	0.4	0.1	1137	74	481000	26000	7.79	0.6	0.0044	0.0031	13.9	1	0.052	0.015	1.17	0.24	3.89	0.47	0.71	0.1	25.1	2.4	8.65	0.59	99.9	6.9	34.8	2.4	169	10	33.9	1.8	323	21	64.9	4.4	12780	850	3.91	0.4
MC13ST-18_14	26.005	166	61	Below LOD	Below LOD	306	20	1.75	0.88	0.36	0.12	487	33	494000	32000	5.34	0.57	Below LOD	Below LOD	9.35	0.82	0.0191	0.0074	0.55	0.16	1.44	0.3	0.363	0.083	9.1	1.2	3.55	0.34	40.4	3.3	15.5	1.2	75.1	6.1	16	1.2	154	11	31.6	2	13260	850	3.58	0.37
MC13ST-18_20	26.049	271	52	Below LOD	Below LOD	383	23	3.15	0.9	0.314	0.089	923	50	513000	30000	9.6	0.73	Below LOD	Below LOD	15.9	1.3	0.05	0.012	0.92	0.22	4.02	0.48	0.88	0.14	21.7	2	7.55	0.54	82.1	5.1	30.5	1.8	148.1	9.9	31	2.2	302	23	63.8	3.8	12100	770	5.74	0.44
MC13ST-18_22	26.037	511	45	Below LOD	Below LOD	574	39	7.22	0.95	0.47	0.12	2040	120	540000	33000	33.8	2.5	0.0072	0.0043	37	2.6	0.125	0.021	2.65	0.37	8.58	0.83	1.91	0.18	51.6	3.8	17.2	1.3	186	11	68.3	5.8	302	23	58.2	4.1	525	39	96.3	6.2	12180	970	6.68	0.6
MC13ST-18_27core	26.043	209	50	Below LOD	Below LOD	349	24	3.53	0.84	0.26	0.094	543	44	515000	36000	4.02	0.45	0.0038	0.0032	12.8	1.2	0.038	0.011	0.43	0.13	1.98	0.32	0.544	0.086	11.1	1.4	3.99	0.43	47.7	4.8	17.5	1.8	78	7.1	15.7	1.4	154	16	30.5	2.7	12010	860	1.52	0.18
MC13ST-18_23	26.005	728	61	Below LOD	Below LOD	383	21	7.6	1.2	0.5	0.12	1770	110	477000	30000	10.09	0.87	0.128	0.022	24.5	1.7	0.176	0.032	2.37	0.35	6.07	0.58	1.39	0.16	38.6	2.8	13.44	0.82	157.1	9.7	56.4	3.1	254	15	52.9	2.8	482	30	95.5	6.3	12360	830	4.14	0.35
MC13ST-18_28rim	26.01	223	35	Below LOD	Below LOD	362	23	2.93	0.72	0.3	0.078	748	36	537000	28000	7.72	0.6	0.002	0.0021	8.86	0.71	0.038	0.011	0.76	0.16	2.79	0.37	0.477	0.081	17.9	1.5	5.73	0.44	72.2	4.9	24.8	1.5	118.1	7.9	23.8	1.5	216	13	45.9	3.4	12550	890	3.5	0.34
MC13ST-18_32	26.018	165	49	Below LOD	Below LOD	368	28	2.82	0.79	0.225	0.088	718	39	520000	31000	7	0.66	Below LOD	Below LOD	14.8	1.4	0.04	0.013	0.96	0.27	2.77	0.42	0.92	0.14	18.2	1.8	5.67	0.5	67.4	5	24.5	1.5	113.1	7.7	23.8	1.4	218	16	44.8	2.7	12070	890	4.24	0.4
MC13ST-18_29	26.305	244	50	Below LOD	Below LOD	346	22	2.9	1	0.37	0.11	639	58	502000	28000	3.87	0.41	Below LOD	Below LOD	14.6	1	0.119	0.029	1.73	0.38	3.79	0.63	1.01	0.16	19	2.1	5.96	0.65	63.1	6.4	21.3	2.2	98.8	9.4	19	1.5	168	13	33.6	3	11530	710	1.33	0.16
MC14ST-1_03in	26.006	280	67	Below LOD	Below LOD	281	22	5.5	1	0.209	0.092	670	37	486000	26000	1.37	0.25	0.0198	0.008	9.56	0.91	0.165	0.029	2.64	0.35	4.14	0.52	1.11	0.16	17.1	1.8	5.17	0.45	57.6	3.7	22.6	1.5	106.1	7.5	21.4	1.9	208	21	45.5	5.5	8470	930	0.7	0.15
MC14ST-1_05	26.038	435	61	Below LOD	Below LOD	358	29	5.6	1.3	0.52	0.11	2010	240	481000	30000	29.6	3.4	0.134	0.042	115	19	1.22	0.31	14.9	3.1	18.8	4.6	6.8	1.6	60	10	15.6	1.9	174	20	64.6	8	298	32	64	7.4	578	66	121	13	10400	1000	5.82	0.53
MC14ST-1_02in	26.059	337	50	Below LOD	Below LOD	294	23	5.22	0.91	0.318	0.079	1224	58	452000	28000	5.54	0.54	0.0172	0.0062	16.8	1.4	0.312	0.043	4.89	0.73	7.37	0.9	2.08	0.22	33.9	2.3	10.68	0.7	117.1	6.6	42.8	2.8	192	14	40.2	3.3	370	35	78.1	7.3	9820	900	4.93	0.8
MC14ST-1_12	26.009	560	59	Below LOD	Below LOD	374	23	64	13	12.8	2.8	2610	150	419000	21000	29.2	1.9	2.51	0.58	93.9	7.8	1.6	0.19	16.6	1.9	21.4	2.1	8.89	0.95	79.2	6.4	23.8	1.8	251	15	86.4	4.5	390	24	82.9	5.3	746	61	148	11	6370	550	6.15	0.71
MC14ST-1_15	26.01	354	50	Below LOD	Below LOD	304	26	5.76	0.93	0.345	0.088	1288	80	492000	27000	2.65	0.37	0.0445	0.009	16.5	1.4	0.387	0.037	5.68	0.62	8.47	0.98	2.46	0.26	37.6	3.6	11.32	0.88	123.5	9.8	43.2	3	194	15	39.7	3.8	372	42	72.2	7.3	8710	870	1.37	0.29
MC14ST-1_17	26.028	260	48	Below LOD	Below LOD	290	21	4.9	1.3	0.253	0.092	1057	58	488000	30000	1.98	0.27	0.044	0.011	15.2	1.2	0.297	0.035	4.47	0.5	7.88	0.92	2.12	0.23	31.4	3.1	9.21	0.67	101.8	6.5	36	2.5	162	11	33.9	2.6	308	26	62.1	5.3	8170	660	1.15	0.17
MC14ST-1_31	26.007	534	56	Below LOD	Below LOD	405	21	11.3	1.1	0.428	0.085	1920	110	469000	20000	20.5	1.8	0.319	0.035	75.8	4.7	1.17	0.11	16.8	1.5	23.4	1.9	9.68	0.77	77.4	5	19.4	1.3	200	13	66.2	4.4	282	15	56.3	3.5	488	29	100	5.7	7110	400	3.24	0.37
MC14ST-1_36	26.005	750	190	Below LOD	Below LOD	373	22	139	59	0.59	0.21	1254	83	484000	29000	12.3	1.5	0.33	0.2	22.9	2	0.207	0.087	2.23	0.51	4.17	0.58	1.27	0.16	21.2	1.9	7.38	0.54	101.2	7.5	38.5	2.4	205	13	46.9	3.3	430	33	95.4	6.9	9350	740	2.92	0.29
MC14ST-1_44	26.004	352	53	Below LOD	Below LOD	304	20	3.65	0.73	0.332	0.093	936	47	446000	21000	7.92	0.76	0.14	0.027	18	1.3	0.13	0.027	1.92	0.4	3.11	0.43	0.79	0.13	17.2	1.6	6.32	0.51	75.7	4.3	30.5	2	153.2	9.7	33.4	2.3	302	23	68.8	6.2	8900	720	2.8	0.39
MC14ST-8_23	26.055	354	49	Below LOD	Below LOD	286	27	3.5	1	0.45	0.13	577	46	458000	40000	13.4	1.3	0.062	0.017	1.96	0.32	0.07	0.019	0.45	0.13	0.99	0.25	0.337	0.073	6.94	0.94	3.01	0.35	45	3.6	16.8	1.4	99	10	23.5	2.7	245	29	45.7	5.2	14100	1500	14.6	2.1
MC14ST-8_25	26.016	580	160	Below LOD	Below LOD	324	31	8.1	1.5	0.67	0.19	906	89	488000	41000	24.7	2.2	41	59	90	130	4.1	7.6	43	60	8	10	0.29	0.19	12.2	7.4	4.34	0.8	62.1	7.2	26	2.6	143	14	37.8	4.6	397	54	89	15	18500	2300	49	8.6
MC14ST-8_26	26.022	505	68	Below LOD	Below LOD	339	30	3.61	0.84	0.46	0.1	806	59	474000	33000	21.5	1.8	0.044	0.014	2.41	0.31	0.067	0.018	0.49	0.16	1.11	0.21	0.376	0.087	8.57	0.9	4.2	0.45	60.6	3.8	23.5	1.6	129	12	30.4	3.1	335	37	65.1	7.9	15000	1600	26.6	5.2
MC14ST-8_27in	26.023	457	73	Below LOD	Below LOD	296	21	4.7	1.1	0.44	0.12	711	64	475000	34000	18.1	2.2	0.086	0.017	2.7	0.38	0.081	0.022	0.74	0.21	1.22	0.28	1.29	0.23	8.5	1.4	3.69	0.41	55.7	4.6	22.2	2	110	11	25.3	2.5	252	26	51.1	5.2	14200	1400	13	1.9
MC14ST-8_32	26.019	384	59	Below LOD	Below LOD	339	22	3.23	0.94	0.44	0.11	802	55	482000	43000	18.4	1.2	0.0087	0.0046	2.54	0.32	0.0125	0.006	0.179	0.091	1.35	0.31	0.037	0.022	10.2	1.2	4.8	0.42	66.3	5.6	25.9	1.9	131	10	28.3	2.2	266	20	51.5	4.2	12700	1000	11.59	0.98
MC14ST-8_30	26.012	954	92	Below LOD	Below LOD	383	25	5.28	0.93	0.63	0.14	2700	150	489000	30000	24.7	2.1	0.0214	0.0069	7.9	0.58	0.145	0.022	2.59	0.41	9.27	0.84	0.196	0.048	58.1	4.4	20.5	1.6	246	16	85.5	6.1	387	28	79.7	6.1	750	55	138.2	9.1	15100	1000	21.6	1.7
MC14ST-8_29	26.021	385	59	Below LOD	Below LOD	291	26	4.27	0.85	0.373	0.096	563	43	509000	47000	21	2	0.0269	0.0077	0.74	0.16	Below LOD	Below LOD	0.054	0.051	0.3	0.15	0.02	0.016	3.24	0.56	1.98	0.23	36.9	3.6	17.5	1.6	113	10	30.2	3.2	341	38	67.3	7.2	16200	1800	24.7	3.2
MC14ST-8_31	26.012	490	170	Below LOD	Below LOD	248	15	4.3	3.5	0.61	0.22	719	55	448000	24000	9.4	1.1	0.03	0.015	2.57	0.45	0.031	0.018	0.38	0.21	1.17	0.48	0.29	0.11	10.2	1.9	3.8	0.61	56.5	7.1	21.9	1.9	115	11	24.7	2	257	22	51.4	4.7	11920	780	5.18	0.65
MC14ST-8_28	26.011	602	68	Below LOD	Below LOD	357	35	3.4	1.1	0.34	0.1	1380	110	479000	37000	13.2	1.2	0.0191	0.0076	6.09	0.72	0.048	0.016	1.09	0.27	3.55	0.57	0.485	0.093	23.5	2.5	8.75	0.9	119	10	44.9	3.6	222	21	46.6	4.4	454	44	84.3	9.1	11200	1400	4.36	0.55
MC14ST-10_12	26.004	404	98	Below LOD	Below LOD	366	28	3.2	1.5	0.36	0.14	1481	87	536000	43000	19.2	1.6	Below LOD	Below LOD	6.25	0.74	Below LOD	Below LOD	0.54	0.18	2.17	0.48	0.365	0.096	18.1	2.3	7.54	0.7	113.6	8.4	48.7	3.5	264	17	59.7	4.2	592	37	135.6	9.8	11900	1000	7.83	0.71
MC14ST-10_13	26.011	942	83	Below LOD	Below LOD	396	21	2.7	1.3	0.48	0.16	1720	100	516000	32000	9.56	0.7	0.0086	0.0056	4.02	0.5	0.0196	0.0088	0.48	0.16	2.21	0.47	0.298	0.077	19.8	2	8.05	0.53	125.7	7.1	53.9	3	297	18	67	4.1	680	40	142.6	8.8	12850	910	4.02	0.41
MC14ST-10_14	26.018	570	110	3000	2300	315	24	3	2.1	0.31	0.16	1340	100	469000	47000	15.2	1.4	Below LOD	Below LOD	4.61	0.57	Below LOD	Below LOD	0.4	0.2	1.94	0.47	0.173	0.074	15.1	2	6.43	0.79	98.7	9.3	40.4	3.5	231	22	53.3	5	544	47	115.5	9.3	11020	880	7.58	0.83
MC14ST-10_15	26.049	556	76	Below LOD	Below LOD	384	25	2.6	1.5	0.53	0.2	1648	95	507000	36000	19.4	1.6	Below LOD	Below LOD	5.69	0.62	0.024	0.011	0.77	0.23	2.49	0.42	0.454	0.098	19.4	2.2	7.77	0.56	128	8.8	51.5	3.7	292	23	64.1	4.7	645	47	138.3	9.3	11230	810	6.42	0.62
MC14ST-10_29	26.017	556	60	Below LOD	Below LOD	355	23	2.8	1.3	0.71	0.18	1194	55	522000	30000	9.9	0.94	Below LOD	Below LOD	2.41	0.31	Below LOD	Below LOD	0.37	0.14	1.09	0.26	0.144	0.052	11.6	1.2	5.42	0.44	85.7	4.9	37.2	2.1	221	13	52.2	2.6	539	28	114.3	5.8	14590	890	6.07	0.55
MC14ST-10_24	26.008	619	84	Below LOD	Below LOD	390	26	2.87	0.95	0.36	0.096	1140	82	567000	39000	7.26	0.7	Below LOD	Below LOD	2.36	0.31	0.0134	0.0075	0.48	0.16	1.73	0.32	0.16	0.048	14.7	1.5	5.7	0.55	89.7	7.3	36.2	2.8	196	16	44	3.4	442	31	98	7.1	13700	1100	2.36	0.28
MC14ST-10_05	26.004	639	60	Below LOD	Below LOD	368	17	2.34	0.86	0.53	0.15	1288	58	513000	29000	11.28	0.83	Below LOD	Below LOD	2.68	0.24	0.0083	0.0065	0.221	0.097	1.31	0.26	0.157	0.048	12.4	1.1	5.54	0.35	91.7	4.3	41.8	2.2	240	12	57.2	2.8	561	27	125.7	5.7	14860	740	7.28	0.36
MC14ST-10_09	26.013	621	56	Below LOD	Below LOD	378	17	2.26	0.69	0.54	0.13	1445	55	507000	23000	12.49	0.78	Below LOD	Below LOD	3.22	0.28	0.0099	0.0051	0.42	0.1	1.99	0.29	0.18	0.038	15.3	1.1	6.99	0.45	108.8	4.9	46.8	2.3	266	13	63.3	3	633	28	141.9	6.5	14220	730	8.23	0.41
MC14ST-10_30out	26.014	830	110	Below LOD	Below LOD	329	17	4.1	1.3	0.76	0.18	1412	83	490000	31000	16.4	1.2	2.98	0.57	21.2	3.2	3.37	0.69	18.9	3.7	12.4	2.4	8	1.5	29.5	3.6	9.24	0.85	121.3	8.8	45.2	3.1	249	16	56.3	2.9	555	30	114.4	6.2	12150	770	7.93	0.64
MC14ST-10_28	26.025	554	76	Below LOD	Below LOD	367	25	3.8	1.1	0.61	0.14	1149	72	513000	37000	9.86	0.88	Below LOD	Below LOD	1.99	0.22	0.0126	0.0077	0.27	0.1	1.1	0.29	0.108	0.05	10.8	1.1	4.93	0.52	79.9	6.1	36.2	2.3	214	14	48.6	3.2	512	34	113.9	7.6	13630	930	6.79	0.6
MC14ST-10_26	26.032	238	68	Below LOD	Below LOD	319	17	3.4	1.2	0.126	0.076	965	47	525000	33000	4.3	0.38	0.0033	0.0035	12.8	0.89	0.042	0.012	1.59	0.26	4.12	0.53	2.01	0.22	26.4	2	8.72	0.68	95.5	5.5	31.8	1.9	142.1	7.7	28.2	1.8	239	12	45.6	2.4	12510	630	1.43	0.17
MC14ST-12A_01	26.087	452	69	Below LOD	Below LOD	401	18	4.8	1.1	0.213	0.078	489	33	510000	24000	1.95	0.27	0.0081	0.0045	0.44	0.13	0.017	0.0081	0.336	0.09	1.86	0.36	0.144	0.053	17	1.3	6.33	0.53	64	4.4	14.9	1.2	45.2	3.8	6.38	0.73	43.4	5	7.8	0.91	13790	790	1.67	0.27
MC14ST-12A_05	26.044	381	44	Below LOD	Below LOD	366	13	3.19	0.89	0.256	0.075	739	27	515000	19000	4.81	0.47	Below LOD	Below LOD	2.96	0.26	0.024	0.01	0.58	0.16	2.3	0.3	0.348	0.057	15.8	1.1	5.71	0.37	65.5	2.7	23.7	1	114.5	4.8	23.6	1	211	10	43.9	2	11870	580	1.12	0.14
MC14ST-12A_04	26.007	430	76	Below LOD	Below LOD	439	23	5.1	1.2	0.37	0.13	1510	120	556000	24000	7.02	0.65	Below LOD	Below LOD	8.76	0.66	0.16	0.039	3.3	0.49	8.6	1.2	1.2	0.19	42.5	4.8	12.9	1.1	147	14	50.9	4.5	231	20	46.3	4	392	33	78.6	7.1	10760	520	1.51	0.17
MC14ST-12A_08	26.057	1080	130	Below LOD	Below LOD	630	37	4.5	1.8	0.61	0.16	2060	190	523000	29000	8.5	0.89	Below LOD	Below LOD	4.1	1.3	0.042	0.019	0.96	0.37	3.8	1	0.39	0.12	29.2	5.8	10.7	1.7	155	17	64.9	6.4	360	34	84.6	7.8	815	82	174	20	14500	1300	3.74	0.59
MC14ST-12A_32	26.06	536	89	Below LOD	Below LOD	524	33	7.3	1.2	0.47	0.12	1510	250	536000	24000	5.7	1.2	Below LOD	Below LOD	10.3	2.4	0.119	0.035	2.25	0.57	6.2	1.3	1.64	0.39	35.8	5.6	12.3	1.9	141	21	49.4	8.1	235	42	46.6	8.3	410	75	82	15	12370	880	1.66	0.26
MC14ST-12A_22	26.05	727	98	Below LOD	Below LOD	493	43	3.75	0.76	0.59	0.15	1370	180	566000	23000	10.6	1.5	Below LOD	Below LOD	3.08	0.83	0.0174	0.0088	0.49	0.18	2.1	0.44	0.233	0.09	18	2.8	7.15	0.77	106	11	42.8	5.4	228	36	53.4	9.6	520	100	110	22	17500	760	5.7	0.61
MC14ST-12A_24	26.081	645	88	Below LOD	Below LOD	529	24	Below LOD	Below LOD	0.29	0.11	1051	58	513000	26000	3.6	0.34	Below LOD	Below LOD	1.48	0.35	0.027	0.013	0.43	0.17	1.43	0.32	0.284	0.09	10.2	1.3	5.05	0.47	77.6	4.9	28.7	2	134.3	8.3	26.3	1.7	224	14	38.3	2.5	13700	1000	3.61	0.42
MC14ST-12A_26	26.034	825	88	Below LOD	Below LOD	585	29	8.8	1.9	0.43	0.13	2210	170	530000	25000	7.84	0.84	0.0166	0.008	9.6	1.3	0.143	0.031	2.8	0.49	8.5	1.3	1.04	0.24	55.9	5.6	18	1.4	204	16	72.1	5.9	331	26	62.9	4.7	547	41	108.2	9	10640	470	1.62	0.19
MC14ST-12A_25in	26.173	764	87	Below LOD	Below LOD	506	26	5.1	1.2	0.34	0.12	1476	88	540000	29000	4.64	0.5	0.0046	0.004	9.45	0.79	0.133	0.023	2.84	0.46	8.37	0.99	1.2	0.18	44.4	3.6	13.53	0.95	149	10	48.8	2.6	216	13	43.2	2.8	361	18	72.9	4.9	11570	630	0.96	0.14
MC14ST-12A_15in	26.031	511	52	Below LOD	Below LOD	457	17	5.8	1	0.267	0.098	1118	47	550000	18000	3.61	0.37	0.0072	0.0041	7.76	0.58	0.133	0.025	2.59	0.3	7.25	0.71	1.03	0.14	36.2	2	10.06	0.6	111.5	5.3	37.4	1.7	162.7	7.7	32.4	1.6	279	14	58	2.7	10870	520	0.712	0.092
MC14ST-12A_16	26.182	642	49	Below LOD	Below LOD	530	21	4.44	0.83	0.353	0.077	1555	71	560000	25000	5.57	0.52	Below LOD	Below LOD	5.64	0.48	0.083	0.015	1.59	0.29	5.62	0.62	0.67	0.1	38	2.2	12.55	0.75	146.8	6.3	51.7	2.3	239	11	47.1	2.2	410	17	84.3	3.1	12640	500	1.56	0.16
MC14ST-12A_17in	26.008	459	89	Below LOD	Below LOD	368	19	4.7	1.4	0.34	0.12	782	55	508000	24000	5.03	0.58	Below LOD	Below LOD	4.13	0.58	0.051	0.018	1.37	0.38	3.5	0.56	0.53	0.11	22.1	2.6	6.59	0.78	73.8	6.4	25.8	2.5	118	10	23.5	1.7	204	15	44.1	3.6	9640	520	1.19	0.18
MC14ST-12A_17out	26.075	791	82	Below LOD	Below LOD	467	17	2.7	1.1	0.5	0.13	1302	66	499000	26000	8.27	0.66	Below LOD	Below LOD	0.54	0.13	Below LOD	Below LOD	0.121	0.093	1.05	0.29	Below LOD	Below LOD	8.36	0.92	5.35	0.52	85.6	5.7	40.7	2.2	245	12	58.1	2.9	574	33	123.4	6.2	16870	930	4.12	0.3
MC14ST-12A_19in	26.007	649	63	Below LOD	Below LOD	531	27	6.4	1.1	0.359	0.088	1580	160	547000	22000	5.32	0.86	0.0054	0.0038	9.7	1.3	0.132	0.028	2.51	0.47	8	1.1	1.16	0.16	45.6	5.3	14.9	1.7	153	16	51.4	5.3	229	20	46.4	4.9	405	40	79	6.5	11340	430	1.13	0.13
MC14ST-12A_19out	26.013	927	66	Below LOD	Below LOD	446	17	Below LOD	Below LOD	0.54	0.16	1220	51	502000	20000	6.35	0.62	Below LOD	Below LOD	0.37	0.11	Below LOD	Below LOD	Below LOD	Below LOD	0.62	0.19	0.067	0.04	4.98	0.69	3.98	0.38	74	3.9	38.5	2.3	242	12	63.5	3.4	660	33	143.9	6.3	16540	830	4.74	0.37
MC14ST-13_02	26.151	376	40	Below LOD	Below LOD	370	21	3.43	0.98	0.32	0.13	701	39	478000	30000	4.91	0.43	Below LOD	Below LOD	3.56	0.38	0.0195	0.0082	0.54	0.16	2.43	0.33	0.248	0.054	14.4	1.3	5.65	0.44	65.5	4.5	23	1.5	105.3	6.7	22.5	1.5	208	15	41	2.5	11260	770	1.79	0.23
MC14ST-13_03	26.014	511	76	Below LOD	Below LOD	410	34	3.2	1.1	0.202	0.078	885	59	518000	35000	7.01	0.83	Below LOD	Below LOD	4.14	0.48	0.048	0.015	0.7	0.2	2.95	0.5	0.344	0.077	17.8	1.7	7.23	0.62	81.4	6.3	30.5	2.8	144	12	29.9	2.5	275	26	53.8	4.2	12500	1100	2.32	0.28
MC14ST-13_01	26.02	563	52	Below LOD	Below LOD	404	19	2.69	0.93	0.34	0.11	854	42	475000	24000	5.79	0.49	Below LOD	Below LOD	3.67	0.32	0.03	0.01	1	0.17	2.91	0.36	0.326	0.063	17.6	1.7	6.35	0.46	73.3	4.6	26.8	1.3	128.6	7.5	26.6	1.9	246	15	47.8	2.3	11680	710	2.16	0.24
MC14ST-13_14	26.003	547	61	Below LOD	Below LOD	400	27	3.37	0.93	0.254	0.081	798	55	506000	33000	4.68	0.46	Below LOD	Below LOD	4.38	0.51	0.044	0.016	0.71	0.14	3.28	0.45	0.395	0.082	19.9	1.7	6.92	0.7	75.3	6.1	27.4	2.3	126	11	25.9	2.1	238	19	46.7	3.8	11310	960	1.48	0.19
MC14ST-13_17	26.034	546	68	Below LOD	Below LOD	400	27	2.99	0.84	0.33	0.11	857	44	513000	37000	6.53	0.69	Below LOD	Below LOD	5.17	0.66	0.0339	0.0098	0.82	0.17	3.08	0.42	0.356	0.087	17.8	1.5	6.99	0.65	79.2	5.8	28.3	1.8	136.4	8.6	27.9	2.1	263	16	51.2	3.1	11300	750	2.1	0.27
MC14ST-13_21	26.036	398	64	Below LOD	Below LOD	391	24	3.1	1.1	0.29	0.11	766	59	497000	34000	4.62	0.42	Below LOD	Below LOD	4.33	0.59	0.034	0.014	0.77	0.2	3.07	0.53	0.284	0.071	18.6	2	6.58	0.63	74.4	6.4	26	2.5	117.8	8	24.6	2	218	19	43.2	3	12230	990	1.57	0.24
MC14ST-13_31	26.025	403	63	Below LOD	Below LOD	412	35	Below LOD	Below LOD	0.3	0.1	742	53	534000	32000	4.6	0.47	0.0027	0.003	4.07	0.41	0.032	0.011	0.74	0.19	3.08	0.46	0.455	0.09	19.1	1.9	6.42	0.6	68.7	4.7	24.4	1.6	114.5	8.8	23.2	1.9	205	17	40.6	2.9	12000	920	1.8	0.22
MC14ST-13_32	26.009	366	49	Below LOD	Below LOD	359	22	2.08	0.72	0.175	0.069	689	40	450000	30000	4.52	0.4	Below LOD	Below LOD	3.34	0.31	0.033	0.013	0.59	0.15	1.94	0.3	0.24	0.051	15.8	1.4	5.52	0.5	63.8	3.3	22.9	1.4	104.7	5.8	21.3	1.6	193	12	38.4	2	10690	680	2.03	0.21
MC14ST-13_35	26.071	285	59	Below LOD	Below LOD	385	30	3.9	1.2	0.26	0.1	910	64	561000	47000	5.77	0.64	0.0079	0.0058	6.61	0.78	0.115	0.03	1.83	0.45	5.5	1	0.59	0.13	28	3.1	9.19	0.96	93.5	7.2	31.3	2.5	140	10	27.3	2.2	247	21	49.8	3.9	12600	1000	1.92	0.3
MC14ST-13_43	26.049	615	82	Below LOD	Below LOD	406	27	2.67	0.94	0.32	0.12	910	50	533000	40000	7.55	0.77	Below LOD	Below LOD	4.38	0.46	0.034	0.013	0.84	0.24	2.98	0.5	0.3	0.094	19.3	1.8	6.82	0.62	84.2	5.1	31	2.4	139.3	7.7	29.4	2.1	284	24	56.8	4	11680	970	2.39	0.28
MC14ST-4_22	26.045	232	45	Below LOD	Below LOD	307	13	3.48	0.83	0.212	0.078	464	16	523000	26000	6.38	0.45	0.0026	0.0023	3.86	0.33	0.035	0.01	0.74	0.14	2.51	0.39	0.232	0.047	13.7	1.1	4.12	0.34	46	2.4	15.68	0.9	70.7	3.5	14.51	0.83	130.7	6.3	26.8	1.4	12680	660	2.57	0.2
MC14ST-4_23	26.035	290	50	Below LOD	Below LOD	322	18	3.08	0.78	0.277	0.083	851	35	486000	20000	5.55	0.55	Below LOD	Below LOD	4.81	0.45	0.096	0.017	1.97	0.31	5.8	0.63	0.64	0.1	30.3	2.7	8.82	0.69	88	5.3	29.7	1.5	124.7	6.1	24.8	1.7	215	15	44.1	3.4	11520	770	2.9	0.29
MC14ST-4_30	26.072	391	41	Below LOD	Below LOD	348	17	4.01	0.89	0.249	0.073	769	23	501000	19000	6.96	0.52	0.0141	0.006	5.29	0.4	0.058	0.014	1.54	0.24	3.77	0.44	0.435	0.075	22.3	1.2	7.42	0.43	76.2	3	26.26	0.91	117.3	5	24.1	1.5	208	14	43.3	2.9	12020	830	2.38	0.25
MC14ST-4_36	26.003	529	57	Below LOD	Below LOD	363	19	4.13	0.81	0.24	0.087	787	46	472000	23000	6.56	0.53	0.005	0.0033	4.98	0.45	0.052	0.016	1.1	0.2	3.71	0.48	0.452	0.074	21.2	1.7	7.17	0.49	77.4	5	26.7	1.5	118.8	6.4	25.9	2.1	217	13	45.5	2.8	11090	700	2.18	0.24
MC14ST-4_35	26.02	544	64	Below LOD	Below LOD	358	17	4.02	0.96	0.31	0.1	807	31	515000	25000	6.75	0.5	Below LOD	Below LOD	4.19	0.4	0.048	0.013	0.96	0.2	3.37	0.51	0.383	0.07	21	1.6	7.27	0.52	78.5	4.2	26.9	1.3	120.3	6.5	24.5	1.2	211	11	43.8	2.6	10870	670	2.06	0.24
MC14ST-4_33	26.103	270	60	Below LOD	Below LOD	309	15	3.74	0.83	0.125	0.056	557	22	496000	21000	6.49	0.49	Below LOD	Below LOD	4.28	0.38	0.049	0.014	0.96	0.16	3.05	0.5	0.242	0.052	17.1	1.3	5.02	0.28	56.4	3	18.6	1	84.4	4.6	17	1.2	156	12	33.1	2.3	11330	780	3.44	0.41
MC14ST-4_44	26.059	262	40	Below LOD	Below LOD	321	15	3.72	0.76	0.3	0.084	628	21	497000	22000	6.98	0.43	0.0017	0.0017	3.99	0.34	0.044	0.011	0.77	0.15	2.62	0.41	0.312	0.061	18.2	1.6	5.42	0.32	61.4	3	21.4	1	94.2	4.7	19.3	1.1	168	10	36.8	2.5	11280	830	2.77	0.27
MC14ST-4_42	26.019	430	59	Below LOD	Below LOD	359	24	4.3	1	0.262	0.084	948	32	487000	19000	7.06	0.62	0.0078	0.0046	6.61	0.66	0.091	0.018	2.14	0.28	6.06	0.62	0.72	0.11	30.6	2.5	9.21	0.52	98.5	4.7	31.1	1.5	141.3	8.4	28.4	2.2	251	19	52.6	3.8	11280	940	2.48	0.34
MC14ST-4_41	26.013	441	49	Below LOD	Below LOD	337	18	3.88	0.92	0.264	0.064	749	32	481000	21000	5.92	0.53	0.0098	0.0044	4.14	0.34	0.041	0.013	0.94	0.2	2.98	0.44	0.371	0.072	18.8	1.5	6.45	0.47	72.9	4	25.4	1.4	115.2	6.1	23.7	1.8	209	17	44.3	3.3	11040	880	1.91	0.22
MC14ST-4_46	26.104	439	46	Below LOD	Below LOD	335	18	3.2	0.59	0.239	0.09	796	37	483000	21000	6.18	0.49	0.0027	0.0025	4.13	0.44	0.064	0.013	1.29	0.23	3.8	0.49	0.465	0.079	21.6	1.6	6.9	0.35	77.3	3.9	26.4	1.7	115.8	5.5	24.1	1.6	206	14	42.9	2.9	11400	870	1.83	0.2
MC13ST-5_11	26.153	698	83	Below LOD	Below LOD	509	23	113	44	8.6	2.2	9000	2100	471000	25000	16300	5000	12.7	2.6	100	22	18.2	4.2	139	30	199	47	13.9	3.2	470	120	112	29	940	250	218	58	770	210	129	34	900	210	137	29	30900	1300	800	230
MC13ST-5_08	26.003	4120	370	Below LOD	Below LOD	453	38	349	38	17.1	2.4	15700	1400	484000	47000	13900	1400	25.5	3.3	141	16	23.4	3	151	17	169	20	8.6	1.1	497	47	149	16	1410	110	345	29	1130	110	181	16	1310	110	183	19	27500	2700	657	63
MC13ST-5_14	26.031	4080	310	Below LOD	Below LOD	487	41	18.9	4.1	8.7	1.3	12100	1100	413000	29000	1330	230	7.99	0.91	28.8	3	5.51	0.48	35.9	4.1	40.5	5.1	1.24	0.2	239	24	85.4	8.5	896	84	239	19	808	74	136	13	1011	91	148	14	25800	2400	258	27
MC13ST-5_17	26.008	1250	120	Below LOD	Below LOD	337	18	1.7	1.1	2.1	0.34	3270	220	407000	21000	161	14	1	0.25	5.08	0.93	1.12	0.19	12.1	2.2	22.8	3.1	0.55	0.15	74.4	8.8	22	2	227	17	66.9	4.7	276	19	55.9	4	485	35	91.9	7.5	48800	3900	726	56
MC13ST-5_16	26.023	582	82	Below LOD	Below LOD	229	19	Below LOD	Below LOD	1.33	0.25	1530	160	302000	28000	85.8	8	0.304	0.042	1.97	0.34	0.266	0.043	3.12	0.62	7.6	1.2	0.099	0.039	33	4.4	10.6	1.4	110	12	31.5	3.3	134	14	28.3	3.4	246	29	43.6	4.8	36100	3900	336	40
MC13ST-5_13	26.021	1400	150	Below LOD	Below LOD	404	27	3	2.2	4.3	1.2	3970	290	442000	36000	195	16	0.95	0.18	5.01	0.87	1.07	0.22	10.3	1.7	19.2	2.4	0.59	0.16	80.4	8.6	25.5	2.8	264	22	82.2	8.5	331	29	67	6.3	602	59	106	12	54000	5900	765	74
MC13ST-5_10	26.02	3160	270	Below LOD	Below LOD	334	22	73	15	23.4	4	5870	510	425000	24000	6400	1500	24	5.1	154	30	12.3	1.9	61.9	8.6	49.2	6.3	2.93	0.37	137	18	44.1	5.2	450	46	140	13	619	52	125.1	9.5	1127	92	208	16	21000	1600	506	93
MC13ST-5_15	26.035	2400	230	Below LOD	Below LOD	283	18	145	31	8.4	1.2	5520	460	436000	29000	1720	300	7.7	1.5	39.4	7.2	6.24	0.88	42.9	5	45.4	3.8	1.18	0.26	116.7	9.3	31	2.4	343	27	111	7.8	484	35	110.1	9.1	1012	82	206	17	20600	1600	245	27
MC13ST-5_04	26.061	1070	120	Below LOD	Below LOD	403	24	2.8	1.3	1.08	0.24	2520	210	440000	30000	273	27	0.441	0.07	3.53	0.52	0.51	0.12	5.4	1.5	8.5	2.6	0.11	0.045	26.2	6	9	1.5	103	11	36.4	3.3	162	12	38.1	2.8	383	31	72.4	5.4	26700	2100	138	11
MC13ST-5_03	26.04	1060	130	Below LOD	Below LOD	341	25	12	2	5.8	2.5	3020	330	411000	27000	370	34	2.04	0.36	8.8	1.4	1.97	0.35	12.9	2.9	10.8	1.9	0.56	0.12	28.3	4.5	9.6	1.3	147	18	58.5	6.7	313	33	76.1	7	762	68	146	13	19000	1500	175	15
MC13ST-5_05	26.253	no value	NAN	no value	NAN	no value	NAN	no value	NAN	no value	NAN	no value	NAN	no value	NAN	no value	NAN	no value	NAN	no value	NAN	no value	NAN	no value	NAN	no value	NAN	no value	NAN	no value	NAN	no value	NAN	no value	NAN	no value	NAN	no value	NAN	no value	NAN	no value	NAN	no value	NAN	no value	NAN	no value	NAN
MC13ST-5_12	26.047	Below LOD	Below LOD	Below LOD	Below LOD	Below LOD	Below LOD	Below LOD	Below LOD	Below LOD	Below LOD	Below LOD	Below LOD	Below LOD	Below LOD	Below LOD	Below LOD	Below LOD	Below LOD	Below LOD	Below LOD	Below LOD	Below LOD	Below LOD	Below LOD	Below LOD	Below LOD	Below LOD	Below LOD	Below LOD	Below LOD	Below LOD	Below LOD	Below LOD	Below LOD	Below LOD	Below LOD	Below LOD	Below LOD	Below LOD	Below LOD	Below LOD	Below LOD	Below LOD	Below LOD	Below LOD	Below LOD	Below LOD	Below LOD
612_1	26.029	Below LOD	Below LOD	84100	4300	49.8	2.6	40.4	2.6	82.8	3.8	42.4	2.1	41.7	5.4	39.5	1.9	37.9	1.6	39.1	2	39.7	1.7	37.6	2.3	39.6	2.5	37.4	1.9	41.2	2.8	39.3	2.2	40	2.7	41.9	2.1	42.6	3.2	40.7	2	41.1	3.4	42.2	2.4	40	4.1	41.3	2.3
612_2	26.005	Below LOD	Below LOD	85200	4500	49.8	2.7	39.4	2.7	80.2	4.1	42.3	2.5	37.8	6.1	39.7	2	38	1.6	38.9	2.4	39.5	1.6	35.4	2.2	38.6	2.4	37	2	40	3.4	40.2	1.9	38.8	2.5	42.4	1.6	43.4	2.7	41.4	2	43.7	2.8	41	2.5	40.9	2.9	40.6	2.4
612_3	26.013	Below LOD	Below LOD	90200	3800	52.3	2.7	41.3	3.1	83.8	3.5	42	1.8	43.5	5.3	41	1.6	38.9	1.7	40.5	2	40.1	1.6	38.4	2.2	41	2.7	37.8	2	41.2	2.8	41.5	2.1	39	2.3	43.4	2.1	42.8	2.7	42.5	1.8	45.7	3.3	41.9	2.3	42.8	3.7	41.1	2.2
612_4	26.129	Below LOD	Below LOD	90000	4600	51.2	3.2	38.3	3	82.4	3.4	44.2	1.8	42.3	5.3	40.5	1.8	38.5	1.7	40.9	1.9	40.7	1.4	39	1.8	40.4	2.6	39.6	1.8	42.6	2.7	41.4	1.9	40	2.7	43	1.9	43.7	2.5	41.1	2.1	42	3.1	40.7	1.9	41.2	3.9	40.2	2.4
612_5	26.027	Below LOD	Below LOD	87300	4000	52	2.5	44.3	3.5	82.8	3.3	44.4	1.8	36.7	5.1	39.9	1.9	38.8	1.4	41.1	1.9	40.5	1.3	36.7	2.2	43.4	2.8	38.3	1.7	43	2.4	42.3	1.6	40	2.9	43.4	1.9	42.7	2.6	43.1	1.9	43.1	2.9	41.8	1.9	42.5	3.3	40.8	1.8
612_6	26.003	Below LOD	Below LOD	86900	4400	50.7	2.5	38.6	1.9	83.1	3.6	42.8	1.9	50.6	8	39.7	1.6	37.6	1.3	38.7	2	39.4	1.3	36	2.2	40.2	2	38	1.9	41.9	2.4	41	1.6	38.3	2.4	41.2	1.8	41.9	2.4	40.7	1.7	40	2.4	39.9	1.9	40.5	4.1	40	2.3
612_7	26.009	Below LOD	Below LOD	90100	4200	52.8	2.8	42	3.6	81.7	3.5	42.9	2.2	44.2	5.3	40.5	2	39	1.7	40	1.7	40.3	1.6	39	2.5	41.9	2.8	38.9	1.8	43.1	3.1	42	1.9	40.7	2.7	43	2.1	45.3	2.5	43.1	2.2	42.5	2.4	41.4	2.2	43.9	3.2	40.1	2
612_8	26.014	Below LOD	Below LOD	88700	3800	51.8	2.3	42.6	3.1	85.7	3.9	43.7	2.1	48.9	4.9	40	1.6	38.7	1.3	41.4	1.8	40.2	1.2	39.6	2	40.2	2	39.7	1.7	42.8	3.3	40.7	1.9	41.5	2.9	44	1.8	43.5	2.2	40.4	1.7	43.8	2.5	40.5	1.6	43.5	3.3	40.4	1.9
612_9	26.112	Below LOD	Below LOD	87800	4300	50.2	3	43.5	3.1	82.8	3.4	44.6	2.1	43.8	5.4	41.5	1.8	39.3	1.8	39.9	1.9	40.6	1.7	38.4	1.9	40.2	2.3	38.4	1.9	42.4	2.8	42	1.7	38.5	1.9	43.8	2.1	45.2	2.7	42.2	2.4	43.4	2.7	40	2.1	40.8	4	40.2	2.1
612_10	26.049	Below LOD	Below LOD	86500	3600	52	2.2	41.5	2.8	82.3	3.8	42.5	2.2	42.4	4.9	40.3	1.6	39	1.3	40.8	1.9	40.1	1.4	37.1	2	40.4	2.1	37.1	1.7	43.9	2.5	41.3	2	39.2	2.5	42.3	2	42.7	2.2	41.6	1.7	42.6	2.7	41.9	1.8	38.9	3.6	41.1	1.8
91500_1	26.012	Below LOD	Below LOD	Below LOD	Below LOD	271	25	4.38	0.63	0.148	0.048	127.6	8.5	535000	36000	1.21	0.18	Below LOD	Below LOD	2.45	0.27	Below LOD	Below LOD	0.126	0.057	0.59	0.16	0.205	0.043	2.08	0.34	0.729	0.099	10.69	0.96	4.45	0.41	24.3	2.3	5.88	0.52	59.9	5.8	12.6	1.3	6340	530	0.61	0.11
91500_2	26.041	Below LOD	Below LOD	Below LOD	Below LOD	263	20	4.56	0.78	0.129	0.042	130	6.7	553000	33000	1.23	0.17	Below LOD	Below LOD	2.71	0.27	Below LOD	Below LOD	0.16	0.057	0.48	0.14	0.218	0.04	1.95	0.28	0.78	0.1	10.83	0.81	4.43	0.32	24.7	1.9	6.5	0.52	63.2	5.5	13	1.1	6530	540	0.54	0.088
91500_3	26.005	Below LOD	Below LOD	Below LOD	Below LOD	275	22	4.59	0.81	0.072	0.036	133.8	6.4	588000	34000	1.18	0.2	Below LOD	Below LOD	2.44	0.28	Below LOD	Below LOD	0.211	0.082	0.34	0.13	0.204	0.042	2.15	0.39	0.81	0.11	10.11	0.86	4.63	0.36	26.3	2.3	6.74	0.77	64.2	5.4	13.6	1.4	6950	710	0.511	0.076
91500_4	26.014	Below LOD	Below LOD	Below LOD	Below LOD	274	24	4.13	0.61	0.126	0.05	131.1	7.8	540000	33000	1.13	0.14	Below LOD	Below LOD	2.52	0.25	0.0131	0.0054	0.145	0.058	0.4	0.12	0.204	0.042	2.16	0.39	0.86	0.12	10.53	0.86	4.46	0.37	24.2	2.1	6.13	0.65	62.1	6.2	12.3	1.2	6770	640	0.503	0.083
91500_5	26.014	Below LOD	Below LOD	Below LOD	Below LOD	278	21	4.83	0.86	0.167	0.056	131.7	7.2	560000	32000	1.19	0.15	Below LOD	Below LOD	2.66	0.33	0.0072	0.0042	0.126	0.052	0.326	0.09	0.224	0.049	2.31	0.42	0.75	0.08	11.16	0.94	4.31	0.31	24.4	1.8	6.51	0.64	63.2	6.5	13.2	1.5	7150	720	0.486	0.082
91500_6	26.156	Below LOD	Below LOD	Below LOD	Below LOD	268	23	3.76	0.74	0.09	0.046	124.7	7.5	535000	31000	1.09	0.15	Below LOD	Below LOD	2.43	0.28	0.0115	0.0054	0.13	0.055	0.41	0.13	0.182	0.049	1.84	0.35	0.79	0.12	10.36	0.95	4.29	0.36	23.2	1.5	5.66	0.47	59.5	5.2	11.2	1.1	6130	580	0.576	0.098
91500_7	26.022	Below LOD	Below LOD	Below LOD	Below LOD	259	21	3.81	0.74	0.121	0.054	134.3	7.6	603000	38000	1.24	0.18	Below LOD	Below LOD	2.64	0.3	Below LOD	Below LOD	0.144	0.062	0.42	0.14	0.237	0.049	1.8	0.33	0.8	0.13	11.59	0.92	4.51	0.32	24.9	2	6.14	0.58	63.2	5.6	12.7	1.2	7160	730	0.556	0.088
91500_8	26.021	Below LOD	Below LOD	Below LOD	Below LOD	260	17	5.1	0.73	0.126	0.041	135.3	6.1	567000	27000	0.87	0.12	Below LOD	Below LOD	2.54	0.22	0.0124	0.0049	0.126	0.064	0.32	0.11	0.218	0.051	1.98	0.34	0.78	0.1	11.44	0.88	4.76	0.31	24.3	1.6	5.78	0.47	60.1	4.5	12.3	1.1	6970	600	0.444	0.066
91500_9	26.017	Below LOD	Below LOD	Below LOD	Below LOD	255	19	4.79	0.73	0.107	0.043	130.6	5.2	557000	26000	0.93	0.13	Below LOD	Below LOD	2.72	0.3	Below LOD	Below LOD	0.208	0.085	0.35	0.13	0.201	0.047	2.15	0.31	0.89	0.11	10.27	0.81	4.46	0.31	24.4	1.9	5.99	0.59	61	5.1	12.6	1.1	6580	560	0.47	0.088
91500_10	26.012	Below LOD	Below LOD	Below LOD	Below LOD	263	21	4.52	0.75	0.112	0.044	126.6	6.2	560000	35000	1.1	0.17	Below LOD	Below LOD	2.8	0.3	0.0083	0.0043	0.22	0.085	0.42	0.13	0.228	0.047	2.16	0.35	0.79	0.11	10.65	0.89	4.51	0.33	25.6	1.7	6.09	0.44	61.6	5.1	12.36	0.95	6490	570	0.537	0.097
	SE = standard error; LOD = limit of detection
	Italic entries are the analyses not plotted in Figure 9 and 10, due to anomalously high Sr, low Th/U, or some rare earth elements (see notes for individual analysis).
	*: Watson, E.B., Wark, D.A. and Thomas, J.B., 2006. Crystallization thermometers for zircon and rutile. Contributions to Mineralogy and Petrology, 151(4), p.413-433.
[truncated: 13 more columns]

## Sheet: Table S6 Zrn Lu-Hf
Table S6. Zircon Lu-Hf data
Sample	% Corr	176Lu/177Hf	1 s error	176Hf/177Hf	1 s error	e(0)	2 s error	t(Ga)	2 s error	176Hf/177Hf(t)	e(t)	Error	Note
MC13ST-14-10	0.221522	0.00178196	0.00019	0.281542	3.7e-05	-43.9557	2.61683	0.0767	0.001	0.281539	-42.3505	2.65954
MC13ST-14-37	0.159463	0.0011413	2.1e-05	0.281552	3e-05	-43.602	2.12175	0.0767	0.001	0.28155	-41.9643	2.14733
MC13ST-14-20	0.416957	0.00432291	0.00027	0.281705	4.7e-05	-38.1916	3.32408	0.0767	0.001	0.281699	-36.7142	3.3749
MC13ST-14-28	0.241998	0.00202871	0.00016	0.281753	3.8e-05	-36.4942	2.68755	0.0767	0.001	0.28175	-34.9002	2.72722
MC13ST-14-01	0.229888	0.00181992	6.2e-05	0.281784	3.3e-05	-35.3979	2.33393	0.0767	0.001	0.281781	-33.7932	2.36366
MC13ST-14-06RIM	0.13391	0.000991814	1.1e-05	0.281785	2.5e-05	-35.3626	1.76813	0.0767	0.001	0.281784	-33.7159	1.79269
MC13ST-14-41RIM	0.138216	0.000960449	3.7e-05	0.281787	3.1e-05	-35.2918	2.19248	0.0767	0.001	0.281786	-33.6435	2.21968
MC13ST-14-29	0.346824	0.00330742	5e-05	0.281794	3.8e-05	-35.0443	2.68755	0.0767	0.001	0.281789	-33.5149	2.71607
MC13ST-14-34	0.169335	0.00122059	5.4e-05	0.281803	4.4e-05	-34.726	3.1119	0.0767	0.001	0.281801	-33.0908	3.14083
MC13ST-14-17	0.344131	0.00274599	0.00013	0.281808	3.7e-05	-34.5492	2.61683	0.0767	0.001	0.281804	-32.9913	2.65346
MC13ST-14-07	0.111611	0.000699664	2.8e-05	0.281949	3e-05	-29.5631	2.12175	0.0767	0.001	0.281948	-27.9006	2.14804
MC13ST-14-11	0.385544	0.00365302	9.5e-05	0.28194	4.8e-05	-29.8814	3.39481	0.653	0.0171	0.281895	-16.9162	3.87834	xenocrystic
MC13ST-14-33	0.101457	0.00071408	5e-05	0.282173	3.6e-05	-21.6419	2.5461	0.6689	0.0165	0.282164	-7.03824	2.97753	xenocrystic
MC13ST-14-16	0.0968236	0.000730431	5.3e-05	0.281045	4.8e-05	-61.5308	3.39481	2.547	0.0068	0.281009	-4.95151	3.73788	xenocrystic
MC14ST-10-20	0.229851	0.00197635	7.7e-05	0.281944	3.6e-05	-29.7399	2.5461	0.0838	0.001	0.281941	-27.9941	2.57808
MC14ST-10-17IN	0.107671	0.000847345	2.5e-05	0.281966	2.2e-05	-28.9619	1.55595	0.0838	0.001	0.281965	-27.1535	1.58217
MC14ST-10-05	0.188861	0.00156369	3.5e-05	0.282011	3.5e-05	-27.3706	2.47538	0.0838	0.001	0.282009	-25.6015	2.50271
MC14ST-10-07	0.169334	0.00136509	2.1e-05	0.282017	2.5e-05	-27.1584	1.76813	0.0838	0.001	0.282015	-25.3783	1.7939
MC14ST-10-13	0.140993	0.00108842	3e-05	0.282019	3.1e-05	-27.0877	2.19248	0.0838	0.001	0.282017	-25.2923	2.21925
MC14ST-10-09	0.191913	0.00158068	2.5e-05	0.282033	2.3e-05	-26.5926	1.62668	0.0838	0.001	0.282031	-24.8244	1.6529
MC14ST-10-17OUT	0.141991	0.00108382	4.3e-05	0.282037	2.4e-05	-26.4512	1.6974	0.0838	0.001	0.282035	-24.6554	1.72562
MC14ST-10-01	0.186221	0.00157882	3.9e-06	0.282041	3.1e-05	-26.3097	2.19248	0.0838	0.001	0.282039	-24.5413	2.21636
MC14ST-10-21	0.142298	0.00108753	4.2e-05	0.282051	2.2e-05	-25.9561	1.55595	0.0838	0.001	0.282049	-24.1604	1.58405
MC14ST-10-19	0.145156	0.00109539	1.6e-05	0.282055	3.5e-05	-25.8147	2.47538	0.0838	0.001	0.282053	-24.0194	2.5006
MC14ST-10-02	0.205775	0.00167636	2e-05	0.282065	3.1e-05	-25.461	2.19248	0.0838	0.001	0.282062	-23.6978	2.21814
MC14ST-10-22	0.172631	0.00137449	1.1e-05	0.282069	2.9e-05	-25.3196	2.05103	0.0838	0.001	0.282067	-23.5397	2.0757
MC14ST-10-18	0.136315	0.0010188	2e-05	0.282077	2.3e-05	-25.0367	1.62668	0.0838	0.001	0.282075	-23.237	1.65234
MC14ST-10-04	0.157764	0.0012347	8.2e-06	0.282085	1.7e-05	-24.7538	1.20233	0.0838	0.001	0.282083	-22.966	1.22669
MC14ST-10-14	0.17232	0.00136004	1.6e-05	0.282095	2.1e-05	-24.4002	1.48523	0.0838	0.001	0.282093	-22.6193	1.51045
MC14ST-25-02OUT	0.231045	0.00167782	6.5e-05	0.282038	3.4e-05	-26.4158	2.40465	0.089	0.001	0.282035	-24.5434	2.43575
MC14ST-25-34OUT	0.205143	0.00154536	2.1e-05	0.282052	1.3e-05	-25.9208	0.919426	0.089	0.001	0.282049	-24.0404	0.945347
MC14ST-25-31	0.285058	0.00225258	1.5e-05	0.282136	1.3e-05	-22.9503	0.919426	0.089	0.001	0.282132	-21.111	0.944641
MC14ST-25-27	0.231046	0.00171897	5.8e-05	0.28219	3.1e-05	-21.0407	2.19248	0.089	0.001	0.282187	-19.1696	2.22275
MC14ST-25-20OUT	0.167951	0.0011593	1.7e-05	0.282202	1.6e-05	-20.6164	1.1316	0.089	0.001	0.2822	-18.7123	1.15705
MC14ST-25-17OUT	0.120541	0.000815701	3.2e-05	0.282316	2.8e-05	-16.585	1.9803	0.089	0.001	0.282315	-14.6599	2.00752
MC14ST-25-11OUT	0.0495518	0.000377331	6.9e-06	0.282343	1.9e-05	-15.6302	1.34378	0.089	0.001	0.282342	-13.6792	1.36804
MC14ST-25-28	0.0981132	0.000720271	5.3e-05	0.282351	1.9e-05	-15.3473	1.34378	0.089	0.001	0.28235	-13.4164	1.37346
MC14ST-25-26	0.0320026	0.000258586	2.6e-06	0.28239	2.3e-05	-13.9682	1.62668	0.089	0.001	0.28239	-12.0098	1.65043
MC14ST-25-6	0.243912	0.00184233	0.00011	0.282055	2.3e-05	-25.8147	1.62668	1.3735	0.0159	0.282007	3.36633	2.20224	xenocrystic
MC14ST-25-18	0.139616	0.000990493	2.9e-05	0.281768	1.6e-05	-35.9637	1.1316	1.6405	0.0081	0.281737	-0.0986389	1.38557	xenocrystic
MC14ST-25-34IN	0.132506	0.000924514	1e-05	0.281474	1.2e-05	-46.3603	0.848701	1.6465	0.0091	0.281445	-10.3271	1.08426	xenocrystic
MC14ST-25-14	0.139654	0.00102411	2.3e-05	0.28192	2.1e-05	-30.5886	1.48523	1.688	0.0175	0.281887	6.31773	1.94788	xenocrystic
MC14ST-25-3	0.127011	0.000884605	3.3e-05	0.281168	2.4e-05	-57.1813	1.6974	2.3845	0.0076	0.281128	-4.53858	1.98245	xenocrystic
MC14ST-25-4	0.110062	0.000730564	2.5e-06	0.281167	2e-05	-57.2166	1.4145	2.425	0.0053	0.281133	-3.40087	1.54702	xenocrystic
MC14ST-8-28	0.276808	0.00233875	8.5e-05	0.282011	3e-05	-27.3706	2.12175	0.0861	0.004	0.282007	-25.597	2.22523
MC14ST-8-31	0.209428	0.00174557	4e-05	0.282062	1.9e-05	-25.5671	1.34378	0.0861	0.004	0.282059	-23.7595	1.44213
MC14ST-8-16	0.195194	0.00145676	1.5e-05	0.282343	1.6e-05	-15.6302	1.1316	0.099	0.001	0.28234	-13.5303	1.15701
MC14ST-8-22	0.200822	0.00173296	0.00014	0.282363	1.7e-05	-14.923	1.20233	0.099	0.001	0.28236	-12.841	1.2441
MC14ST-8-21OUT	0.100052	0.000674874	2.5e-05	0.282364	2e-05	-14.8876	1.4145	0.099	0.001	0.282363	-12.7364	1.44122
MC14ST-8-02	0.129337	0.000881547	1.5e-05	0.282376	1.8e-05	-14.4633	1.27305	0.099	0.001	0.282374	-12.3255	1.29847
MC14ST-8-34	0.179681	0.00129232	3.3e-05	0.282376	1.6e-05	-14.4633	1.1316	0.099	0.001	0.282374	-12.3524	1.15937
MC14ST-8-03	0.193102	0.00144096	8e-05	0.282387	2.1e-05	-14.0743	1.48523	0.099	0.001	0.282384	-11.973	1.51915
MC14ST-8-01OUT	0.198109	0.0014832	4.6e-05	0.282394	1.7e-05	-13.8268	1.20233	0.099	0.001	0.282391	-11.7282	1.2318
MC14ST-8-30	0.125245	0.000905349	9.9e-06	0.282398	2.4e-05	-13.6853	1.6974	0.099	0.001	0.282396	-11.5489	1.72215
MC14ST-8-10	0.156877	0.00114546	7.9e-06	0.2824	2e-05	-13.6146	1.4145	0.099	0.001	0.282398	-11.4939	1.43899
MC14ST-8-05	0.102403	0.000706203	1.1e-05	0.282411	1.6e-05	-13.2256	1.1316	0.099	0.001	0.28241	-11.076	1.15649
MC14ST-8-27IN	0.179131	0.00138432	3.1e-05	0.282415	1.7e-05	-13.0841	1.20233	0.099	0.001	0.282412	-10.9789	1.22983
MC14ST-8-27OUT	0.107704	0.000741538	1.4e-05	0.282418	2.1e-05	-12.9781	1.48523	0.099	0.001	0.282417	-10.8308	1.51051
MC14ST-8-45	0.0879287	0.00059752	5.5e-06	0.282432	1.9e-05	-12.483	1.34378	0.099	0.001	0.282431	-10.3262	1.36795
MC13ST-18-10	0.100738	0.000724568	2.3e-05	0.282317	2.9e-05	-16.5497	2.05103	0.0919	0.001	0.282316	-14.5562	2.07727
MC13ST-18-27CORE	0.107299	0.000730273	2.7e-05	0.282332	2.6e-05	-16.0192	1.83885	0.0919	0.001	0.282331	-14.026	1.86558
MC13ST-18-20	0.135241	0.000995395	3.5e-06	0.282375	3e-05	-14.4986	2.12175	0.0919	0.001	0.282373	-12.5212	2.14563
MC13ST-18-22CORE	0.0817264	0.000555748	3e-05	0.282393	2.4e-05	-13.8621	1.6974	0.0919	0.001	0.282392	-11.8579	1.7245
MC13ST-18	0.0683659	0.00045942	1.4e-05	0.282396	3e-05	-13.756	2.12175	0.0919	0.001	0.282395	-11.7459	2.1469
MC13ST-18-06CORE	0.0683659	0.00045942	1.4e-05	0.282396	3e-05	-13.756	2.12175	0.0919	0.001	0.282395	-11.7459	2.1469
MC13ST-18-06RIM	0.0525399	0.000347217	8.3e-06	0.282399	2.6e-05	-13.6499	1.83885	0.0919	0.001	0.282398	-11.633	1.86331
MC13ST-18-07CORE	0.156455	0.00106153	3.5e-05	0.282408	3.5e-05	-13.3317	2.47538	0.0919	0.001	0.282406	-11.3581	2.50308
MC13ST-18-22RIM	0.0927341	0.000622605	5.4e-05	0.282411	3.9e-05	-13.2256	2.75828	0.0919	0.001	0.28241	-11.2253	2.78829
MC13ST-18-29	0.0624571	0.000405385	1.2e-05	0.282432	3.9e-05	-12.483	2.75828	0.0919	0.001	0.282431	-10.4693	2.78319
MC13ST-18-27RIM	0.0790708	0.000533016	3.8e-05	0.282437	2.5e-05	-12.3062	1.76813	0.0919	0.001	0.282436	-10.3002	1.79619
MC13ST-18-23	0.172121	0.00122518	1.1e-05	0.28244	2e-05	-12.2001	1.4145	0.0919	0.001	0.282438	-10.2362	1.43929
MC13ST-18-08	0.0496319	0.000335542	7.4e-06	0.282476	3.1e-05	-10.927	2.19248	0.0919	0.001	0.282475	-8.90882	2.21683
MC13ST-18-09	0.137731	0.0010242	2.7e-05	0.282576	3.2e-05	-7.39077	2.2632	0.1129	0.0022	0.282574	-4.9613	2.31882	xenocrystic
MC13ST-18-12	0.151747	0.0011919	4.1e-05	0.282592	3.4e-05	-6.82497	2.40465	0.1542	0.0019	0.282589	-3.52209	2.45757	xenocrystic
MC14ST-21-18	0.0968708	0.000748255	3.8e-05	0.28232	2.4e-05	-16.4436	1.6974	0.0916	0.001	0.282319	-14.4581	1.72545
MC14ST-21-19	0.160383	0.00100061	7.4e-05	0.282364	3e-05	-14.8876	2.12175	0.0916	0.001	0.282362	-12.9171	2.15416
MC14ST-21-36	0.105348	0.000761708	1.6e-05	0.282378	1.3e-05	-14.3926	0.919426	0.0916	0.001	0.282377	-12.4075	0.944814
MC14ST-21-37	0.092713	0.000607718	1.4e-05	0.282384	4.1e-05	-14.1804	2.89973	0.0916	0.001	0.282383	-12.1859	2.92487
MC14ST-21-07	0.10887	0.000737699	3.2e-05	0.282391	2.3e-05	-13.9328	1.62668	0.0916	0.001	0.28239	-11.9462	1.654
MC14ST-21-13	0.10274	0.000699583	1.3e-05	0.282418	2.9e-05	-12.9781	2.05103	0.0916	0.001	0.282417	-10.9889	2.07605
MC14ST-21-20	0.0662999	0.000473154	9.1e-06	0.28242	2.8e-05	-12.9073	1.9803	0.0916	0.001	0.282419	-10.9045	2.00485
MC14ST-21-39	0.0722313	0.000524127	9.8e-06	0.282423	1.9e-05	-12.8012	1.34378	0.0916	0.001	0.282422	-10.8014	1.36841
MC14ST-21-02	0.0951916	0.000681435	1.7e-05	0.282445	2.4e-05	-12.0233	1.6974	0.0916	0.001	0.282444	-10.0328	1.72291
MC14ST-21-06	0.104233	0.000765216	1.5e-05	0.282455	2.1e-05	-11.6696	1.48523	0.0916	0.001	0.282454	-9.6842	1.51049
MC14ST-21-08IN	0.0859687	0.000624705	2.3e-05	0.282464	2.4e-05	-11.3514	1.6974	0.0916	0.001	0.282463	-9.35736	1.72364
MC14ST-21-34	0.08373	0.000583461	2e-05	0.282552	2.1e-05	-8.23948	1.48523	0.0916	0.001	0.282551	-6.24233	1.5111
MC14ST-19-26	0.0749705	0.000480443	4.3e-05	0.282393	3.2e-05	-13.8621	2.2632	0.0923	0.0006	0.282392	-11.8446	2.28252
MC14ST-19-37	0.124296	0.00101712	6.9e-05	0.282418	3.1e-05	-12.9781	2.19248	0.0923	0.0006	0.282416	-10.9931	2.21497
MC14ST-19-10	0.0600473	0.000449607	7.5e-06	0.282421	2.6e-05	-12.872	1.83885	0.0923	0.0006	0.28242	-10.8523	1.85384
MC14ST-19-24	0.143626	0.00122264	2.2e-05	0.282439	3.9e-05	-12.2354	2.75828	0.0923	0.0006	0.282437	-10.2628	2.77503
MC14ST-19-02	0.109678	0.000732038	2.8e-05	0.282459	3.8e-05	-11.5282	2.68755	0.0923	0.0006	0.282458	-9.5255	2.70504
MC14ST-19-05	0.0779027	0.000553602	1.6e-05	0.282467	3.6e-05	-11.2453	2.5461	0.0923	0.0006	0.282466	-9.23166	2.56213
MC14ST-19-01	0.0658569	0.000517596	1.8e-05	0.282469	3.9e-05	-11.1746	2.75828	0.0923	0.0006	0.282468	-9.15872	2.77455
MC14ST-19-23	0.0911717	0.000680878	5.5e-06	0.282472	3.8e-05	-11.0685	2.68755	0.0923	0.0006	0.282471	-9.06258	2.7023
MC14ST-19-17	0.0612168	0.00046548	2e-05	0.282478	2e-05	-10.8563	1.4145	0.0923	0.0006	0.282477	-8.83722	1.43101
MC14ST-19-04	0.0566637	0.000417959	1.1e-05	0.282483	3.1e-05	-10.6795	2.19248	0.0923	0.0006	0.282482	-8.65747	2.20789
MC14ST-19-20	0.114718	0.000855149	1.8e-05	0.28249	4.4e-05	-10.432	3.1119	0.0923	0.0006	0.282489	-8.43655	3.12817
MC14ST-19-29	0.099093	0.000739243	4.4e-05	0.282492	3.3e-05	-10.3612	2.33393	0.0923	0.0006	0.282491	-8.35874	2.35337
MC14ST-19-03	0.054377	0.000425903	4.1e-06	0.28252	4.4e-05	-9.37108	3.1119	0.0923	0.0006	0.282519	-7.34927	3.12648
MC14ST-19-13	0.0611221	0.00038756	6e-06	0.28256	4e-05	-7.95657	2.829	0.0923	0.0006	0.282559	-5.93214	2.84381
MC14ST-19-06	0.111607	0.000999828	0.00011	0.282564	2.9e-05	-7.81512	2.05103	0.0923	0.0006	0.282562	-5.82801	2.07852
MC14ST-4-47	0.0874386	0.000572535	8.4e-06	0.282362	1.4e-05	-14.9584	0.990152	0.0919	0.0005	0.282361	-12.9554	1.0029
MC14ST-4-25	0.0671712	0.000430446	7.3e-06	0.282371	2.7e-05	-14.6401	1.90958	0.0919	0.0005	0.28237	-12.6284	1.92219
MC14ST-4-30	0.0900833	0.00057593	2.4e-06	0.282379	3.2e-05	-14.3572	2.2632	0.0919	0.0005	0.282378	-12.3543	2.27522
MC14ST-4-38	0.107538	0.000728641	2.9e-05	0.282382	2.2e-05	-14.2511	1.55595	0.0919	0.0005	0.282381	-12.2575	1.5712
MC14ST-4-20	0.122659	0.000836064	3.9e-06	0.282395	2e-05	-13.7914	1.4145	0.0919	0.0005	0.282394	-11.8042	1.4267
MC14ST-4-40	0.120137	0.000808781	1.1e-05	0.2824	2.3e-05	-13.6146	1.62668	0.0919	0.0005	0.282399	-11.6257	1.63974
MC14ST-4-45	0.10062	0.000652222	1.4e-05	0.282418	2e-05	-12.9781	1.4145	0.0919	0.0005	0.282417	-10.9795	1.42793
MC14ST-4-37	0.0736534	0.000473848	5.4e-06	0.282419	2.2e-05	-12.9427	1.55595	0.0919	0.0005	0.282418	-10.9333	1.56833
MC14ST-4-28	0.0916269	0.000618577	1.4e-05	0.282425	2.7e-05	-12.7305	1.90958	0.0919	0.0005	0.282424	-10.7299	1.923
MC14ST-4-39	0.0868352	0.000559754	2.8e-06	0.28243	3e-05	-12.5537	2.12175	0.0919	0.0005	0.282429	-10.5495	2.13382
MC14ST-4-18	0.105469	0.000712743	3e-06	0.282432	2.6e-05	-12.483	1.83885	0.0919	0.0005	0.282431	-10.488	1.85094
MC14ST-4-44	0.0901377	0.000602802	1.3e-05	0.282434	2.4e-05	-12.4123	1.6974	0.0919	0.0005	0.282433	-10.4106	1.71071
MC14ST-4-36	0.112553	0.000725183	1.6e-05	0.282438	2.3e-05	-12.2708	1.62668	0.0919	0.0005	0.282437	-10.2765	1.64035
MC14ST-4-26	0.0888824	0.000568309	7.6e-06	0.282441	2.6e-05	-12.1647	1.83885	0.0919	0.0005	0.28244	-10.1609	1.8515
MC14ST-4-17	0.0934555	0.000634496	3.9e-06	0.282443	2.5e-05	-12.094	1.76813	0.0919	0.0005	0.282442	-10.0942	1.78033
MC14ST-4-34	0.0650543	0.000403346	2.8e-06	0.282477	2.3e-05	-10.8917	1.62668	0.0919	0.0005	0.282476	-8.87757	1.63874
MC14ST-4-16	0.058147	0.000381599	8.4e-06	0.282538	2.2e-05	-8.73455	1.55595	0.0919	0.0005	0.282537	-6.71869	1.5687
MC14ST-4-01	0.165321	0.00113483	0.0001	0.282628	3.8e-05	-5.55192	2.68755	0.1105	0.001	0.282626	-3.18179	2.72561	xenocrystic
MC14ST-4-02	0.107814	0.000837014	6e-05	0.282674	3.9e-05	-3.92524	2.75828	0.1452	0.002	0.282672	-0.78045	2.8167	mixed
MC14ST-4-03	0.0839958	0.000604171	4.5e-05	0.282634	2.3e-05	-5.33975	1.62668	0.0998	0.0013	0.282633	-3.16433	1.6631	xenocrystic
MC14ST-4-05	0.17851	0.00156582	5.2e-05	0.282582	3.1e-05	-7.1786	2.19248	0.1083	0.0015	0.282579	-4.88696	2.2351	xenocrystic
MC14ST-4-12OUT	0.172199	0.00118324	6.1e-05	0.282541	2.3e-05	-8.62846	1.62668	0.1135	0.0022	0.282538	-6.19831	1.68742	xenocrystic
MC14ST-4-13	0.104298	0.000685922	7.9e-06	0.282404	3.1e-05	-13.4731	2.19248	0.143	0.0027	0.282402	-10.3648	2.25729	mixed
MC14ST-4-14	0.0972085	0.000639768	2e-05	0.282562	2.5e-05	-7.88585	1.76813	0.1033	0.0011	0.282561	-5.63707	1.79665	xenocrystic
MC14ST-4-21	0.139341	0.000854826	4.9e-05	0.282557	2.1e-05	-8.06266	1.48523	0.1096	0.0013	0.282555	-5.69218	1.52281	xenocrystic
MC14ST-4-24	0.065546	0.000354909	7.4e-06	0.282677	1.9e-05	-3.81916	1.34378	0.1013	0.0013	0.282676	-1.59397	1.37525	xenocrystic
MC14ST-4-27	0.163501	0.00109023	1.5e-05	0.282473	2.2e-05	-11.0331	1.55595	0.099	0.0015	0.282471	-8.90822	1.59309	xenocrystic
MC14ST-4-32	0.0625008	0.000325996	1.4e-05	0.282356	1.5e-05	-15.1705	1.06088	0.1188	0.0016	0.282355	-12.5611	1.1006	xenocrystic
MC14ST-13-14	0.0952555	0.0006291	4e-06	0.282302	2.3e-05	-17.0801	1.62668	0.095	0.0008	0.282301	-15.0135	1.64594
MC14ST-13-06	0.0625703	0.000408034	5.1e-06	0.282336	2.6e-05	-15.8778	1.83885	0.095	0.0008	0.282335	-13.797	1.85825
MC14ST-13-10	0.0744577	0.000493429	1.1e-05	0.282345	2.1e-05	-15.5595	1.48523	0.095	0.0008	0.282344	-13.4841	1.50537
MC14ST-13-16	0.113863	0.000769467	3.4e-05	0.282372	2.6e-05	-14.6047	1.83885	0.095	0.0008	0.282371	-12.5464	1.86188
MC14ST-13-09	0.0853963	0.000566065	1.3e-05	0.282372	2.6e-05	-14.6047	1.83885	0.095	0.0008	0.282371	-12.5336	1.85925
MC14ST-13-13	0.0930976	0.00064255	2.1e-05	0.282384	2.4e-05	-14.1804	1.6974	0.095	0.0008	0.282383	-12.114	1.7188
MC14ST-13-04	0.098962	0.000671344	3.6e-06	0.282388	1.9e-05	-14.0389	1.34378	0.095	0.0008	0.282387	-11.9743	1.36299
MC14ST-13-03	0.0988496	0.000682502	9e-06	0.282398	2.3e-05	-13.6853	1.62668	0.095	0.0008	0.282397	-11.6213	1.64657
MC14ST-13-01	0.0761518	0.000508741	1.3e-06	0.282401	2.1e-05	-13.5792	1.48523	0.095	0.0008	0.2824	-11.5043	1.50415
MC14ST-13-12	0.081951	0.000545468	3.6e-05	0.282413	2.6e-05	-13.1549	1.83885	0.095	0.0008	0.282412	-11.0822	1.86213
MC14ST-13-02	0.0465968	0.000304628	1.5e-05	0.282419	2e-05	-12.9427	1.4145	0.095	0.0008	0.282418	-10.8548	1.43515
MC14ST-13-17	0.104945	0.000728655	4.4e-06	0.282441	2.2e-05	-12.1647	1.55595	0.095	0.0008	0.28244	-10.1033	1.57526
MC14ST-12A-06	0.097658	0.000549501	8e-05	0.282258	3.8e-05	-18.6361	2.68755	0.1	0.0009	0.282257	-16.4556	2.71923
MC14ST-12A-07	0.187425	0.00126298	2.1e-05	0.282278	3.4e-05	-17.9288	2.40465	0.1	0.0009	0.282276	-15.7954	2.42853
MC14ST-12A-19OUT	0.203643	0.00154509	1.2e-05	0.28228	1.9e-05	-17.8581	1.34378	0.1	0.0009	0.282277	-15.7433	1.36647
MC14ST-12A-12	0.281588	0.0021568	0.00012	0.282295	1.6e-05	-17.3277	1.1316	0.1	0.0009	0.282291	-15.2532	1.16857
MC14ST-12A-01	0.159764	0.00108055	7.3e-05	0.2823	3.5e-05	-17.1508	2.47538	0.1	0.0009	0.282298	-15.0052	2.50613
MC14ST-12A-25IN	0.194692	0.00137046	5.5e-05	0.282354	1.8e-05	-15.2413	1.27305	0.1	0.0009	0.282351	-13.1143	1.30143
MC14ST-12A-03	0.128123	0.000886409	1.6e-05	0.282367	3.9e-05	-14.7815	2.75828	0.1	0.0009	0.282365	-12.6225	2.7815
MC14ST-12A-19IN	0.161083	0.00109283	1.5e-05	0.282382	3.4e-05	-14.2511	2.40465	0.1	0.0009	0.28238	-12.1056	2.42774
MC14ST-12A-02	0.0986357	0.000632559	2.5e-05	0.282383	2.7e-05	-14.2157	1.90958	0.1	0.0009	0.282382	-12.0398	1.93399
MC14ST-12A-09	0.111547	0.00077936	2.1e-05	0.2824	3.4e-05	-13.6146	2.40465	0.1	0.0009	0.282399	-11.4482	2.42853
MC14ST-12A-16	0.15316	0.00103419	5.4e-06	0.282406	3.2e-05	-13.4024	2.2632	0.1	0.0009	0.282404	-11.2528	2.28502
MC14ST-12A-04	0.176981	0.00123621	2.7e-05	0.282429	3.4e-05	-12.5891	2.40465	0.1	0.0009	0.282427	-10.4527	2.42933
MC14ST-12A-17IN	0.136801	0.000921116	3.3e-05	0.282431	3.2e-05	-12.5183	2.2632	0.1	0.0009	0.282429	-10.3611	2.28867
MC14ST-12A-22	0.0872818	0.000510851	3.1e-05	0.282437	2.5e-05	-12.3062	1.76813	0.1	0.0009	0.282436	-10.1218	1.79333
MC14ST-12A-27IN	0.137185	0.000956047	3.3e-05	0.282457	3e-05	-11.5989	2.12175	0.1	0.0009	0.282455	-9.44379	2.14722
MC13ST-17-30	0.138347	0.000984235	5.6e-05	0.282425	3.9e-05	-12.7305	2.75828	0.1	0.0011	0.282423	-10.5775	2.79148
MC13ST-17-13	0.154578	0.00110247	3.4e-05	0.282431	3.4e-05	-12.5183	2.40465	0.1	0.0011	0.282429	-10.3731	2.43494
MC13ST-17-28	0.113134	0.000781503	3.7e-05	0.282434	3.5e-05	-12.4123	2.47538	0.1	0.0011	0.282433	-10.2458	2.50607
MC13ST-17-12	0.0565811	0.000438304	2.2e-05	0.282453	2.9e-05	-11.7404	2.05103	0.1	0.0011	0.282452	-9.55105	2.07973
MC13ST-17-08	0.116646	0.000824333	9.4e-06	0.282456	4.1e-05	-11.6343	2.89973	0.1	0.0011	0.282454	-9.47045	2.92677
MC13ST-17-16	0.0564565	0.000383223	1.4e-05	0.282462	2.7e-05	-11.4221	1.90958	0.1	0.0011	0.282461	-9.22907	1.93722
MC13ST-17-02	0.059278	0.000413399	2e-06	0.282464	2e-05	-11.3514	1.4145	0.1	0.0011	0.282463	-9.16033	1.44056
MC13ST-17-07	0.0972166	0.000691037	6.8e-06	0.282471	3.6e-05	-11.1038	2.5461	0.1	0.0011	0.28247	-8.93108	2.5728
MC13ST-17-04	0.149029	0.00107399	4.2e-05	0.282472	2.7e-05	-11.0685	1.90958	0.1	0.0011	0.28247	-8.92103	1.94093
MC13ST-17-11	0.0649288	0.000473155	8.9e-06	0.282485	2.2e-05	-10.6088	1.55595	0.1	0.0011	0.282484	-8.4215	1.58292
MC13ST-17-20	0.0500935	0.000365195	1.4e-05	0.282487	3.2e-05	-10.538	2.2632	0.1	0.0011	0.282486	-8.34362	2.29085
MC13ST-17-19	0.0686828	0.000474804	1.6e-05	0.282489	2.9e-05	-10.4673	2.05103	0.1	0.0011	0.282488	-8.28012	2.07894
MC13ST-17-22	0.0410405	0.000284193	4.3e-06	0.282497	4.2e-05	-10.1844	2.97045	0.1	0.0011	0.282496	-7.98456	2.99682
MC13ST-17-29	0.0686636	0.000479074	4.6e-06	0.282506	3.9e-05	-9.86615	2.75828	0.1	0.0011	0.282505	-7.67911	2.78468
MC13ST-17-21	0.0612666	0.000471296	8.8e-06	0.282555	3.1e-05	-8.13339	2.19248	0.1	0.0011	0.282554	-5.94545	2.21944
MC13ST-17-25	0.0469118	0.000341329	3.6e-06	0.282563	4e-05	-7.85049	2.829	0.1	0.0011	0.282562	-5.65389	2.85528
MC14ST-1-01	0.294684	0.00243037	9.2e-05	0.282594	4.6e-05	-6.75425	3.25336	0.156	0.001	0.282587	-3.54051	3.29579
MC14ST-1-39	0.123088	0.000846728	3.2e-05	0.282364	3.1e-05	-14.8876	2.19248	0.156	0.001	0.282362	-11.5133	2.22253
MC14ST-1-42	0.185184	0.00135813	8.8e-05	0.282434	2.7e-05	-12.4123	1.90958	0.156	0.001	0.28243	-9.08984	1.95119
MC14ST-1-08	0.169519	0.00124205	3e-05	0.282449	2e-05	-11.8818	1.4145	0.156	0.001	0.282445	-8.54724	1.44414
MC14ST-1-34	0.0966548	0.000689383	5e-06	0.282467	2.9e-05	-11.2453	2.05103	0.156	0.001	0.282465	-7.85347	2.07551
MC14ST-1-06	0.181153	0.00141845	3.6e-05	0.282486	3e-05	-10.5734	2.12175	0.156	0.001	0.282482	-7.25658	2.15263
MC14ST-1-21	0.222907	0.00171056	0.00012	0.282498	3e-05	-10.1491	2.12175	0.156	0.001	0.282493	-6.86222	2.16997
MC14ST-1-12	0.222122	0.00186104	8.7e-05	0.282484	3e-05	-10.6441	2.12175	0.156	0.001	0.282479	-7.37299	2.16316
MC14ST-1-11	0.149607	0.00107449	3.2e-05	0.282498	2.6e-05	-10.1491	1.83885	0.156	0.001	0.282495	-6.79659	1.86891
MC14ST-1-31	0.235748	0.00196254	8.6e-05	0.282486	5.5e-05	-10.5734	3.88988	0.156	0.001	0.28248	-7.31272	3.93108
MC14ST-1-14	0.135576	0.000962113	7.9e-06	0.282505	3.9e-05	-9.90152	2.75828	0.156	0.001	0.282502	-6.53737	2.78336
MC14ST-1-09	0.165453	0.00121237	3.5e-05	0.282499	1.9e-05	-10.1137	1.34378	0.156	0.001	0.282495	-6.77544	1.37445
MC14ST-1-46	0.181543	0.00122777	5.2e-05	0.282524	5.2e-05	-9.22963	3.67771	0.156	0.001	0.28252	-5.89266	3.71189
MC14ST-1-33	0.17485	0.00122049	1.1e-05	0.282528	2.6e-05	-9.08818	1.83885	0.156	0.001	0.282524	-5.75041	1.86457
MC14ST-1-40	0.205625	0.00147187	9.4e-06	0.28254	3.5e-05	-8.66383	2.47538	0.156	0.001	0.282536	-5.35185	2.50077
MC14ST-1-02IN	0.118853	0.000967634	9.2e-05	0.282552	6.3e-05	-8.23948	4.45568	0.156	0.001	0.282549	-4.87532	4.49812
MC14ST-1-19IN	0.141924	0.00109274	3.3e-05	0.282572	3.2e-05	-7.53222	2.2632	0.156	0.001	0.282569	-4.18074	2.29346
MC14ST-1-27	0.203638	0.00152312	0.00011	0.282594	4.9e-05	-6.75425	3.46553	0.156	0.001	0.28259	-3.4469	3.51168
MC14ST-1-24IN	0.168063	0.00127087	8.8e-05	0.282604	2.3e-05	-6.40062	1.62668	0.156	0.001	0.2826	-3.06712	1.66829
MC14ST-1-44	0.223084	0.00181953	1.7e-05	0.282617	2.3e-05	-5.94091	1.62668	0.156	0.001	0.282612	-2.66386	1.65364
MC14ST-1-43	0.2035	0.00148686	2.5e-05	0.282623	2.5e-05	-5.72873	1.76813	0.156	0.001	0.282619	-2.41728	1.79674
MC14ST-1-36	0.176725	0.00138187	3.7e-05	0.282623	2.7e-05	-5.72873	1.90958	0.156	0.001	0.282619	-2.40645	1.94066
MC14ST-1-04	0.227958	0.00189982	9.1e-05	0.28266	3.8e-05	-4.42032	2.68755	0.156	0.001	0.282654	-1.15103	2.72978
MC14ST-1-37	0.322043	0.00282549	8.6e-05	0.282694	3.8e-05	-3.21799	2.68755	0.156	0.001	0.282686	-0.043793	2.72875
MC14ST-1-41	0.189362	0.00140602	4.1e-05	0.282291	3.1e-05	-17.4691	2.19248	1.148	0.0114	0.282261	7.21366	2.52279	xenocrystic
MC13ST-2-21	0.0383559	0.000256467	1.9e-05	0.281955	3.2e-05	-29.3509	2.2632	0.1	0.001	0.281955	-27.1535	2.28917	metamorphic
MC13ST-2-26	0.0376496	0.000200282	2.3e-06	0.28196	3.1e-05	-29.1741	2.19248	0.1	0.001	0.28196	-26.9729	2.21623	metamorphic
MC13ST-2-25	0.0307939	0.000149345	4.6e-06	0.281975	0.00013	-28.6437	9.19426	0.1	0.001	0.281975	-26.439	9.21832	metamorphic
MC13ST-2-19	0.0444199	0.000289628	7.2e-06	0.282028	2.1e-05	-26.7695	1.48523	0.1	0.001	0.282027	-24.5736	1.50963	metamorphic
MC13ST-2-14	0.0273655	0.0001297	5.7e-06	0.282029	0.00018	-26.7341	12.7305	0.1	0.001	0.282029	-24.5277	12.7547	metamorphic
MC13ST-2-01	0.0359702	0.000196706	7.2e-06	0.282078	3e-05	-25.0013	2.12175	0.1	0.001	0.282078	-22.799	2.14616	metamorphic
MC13ST-2-04	0.0342332	0.000186652	2.5e-06	0.282086	2.3e-05	-24.7184	1.62668	0.1	0.001	0.282086	-22.5154	1.65046	metamorphic
MC13ST-2-23	0.0625388	0.000370605	2.4e-06	0.282098	3.2e-05	-24.2941	2.2632	0.1	0.001	0.282097	-22.1031	2.28697	metamorphic
MC13ST-2-02RIM	0.0268756	0.000146775	1e-06	0.2821	2.6e-05	-24.2233	1.83885	0.1	0.001	0.2821	-22.0175	1.86244	metamorphic
MC13ST-2-16	0.0365531	0.000218033	6.5e-06	0.282104	3.1e-05	-24.0819	2.19248	0.1	0.001	0.282104	-21.8808	2.21679	metamorphic
MC13ST-2-06	0.0724475	0.000472817	4.9e-05	0.282129	2.3e-05	-23.1978	1.62668	0.1	0.001	0.282128	-21.0133	1.65661	metamorphic
MC13ST-2-24	0.048595	0.000295568	2e-05	0.282142	3.4e-05	-22.7381	2.40465	0.1	0.001	0.282141	-20.5418	2.43075	metamorphic
MC13ST-5-11_2nd	0.437881	0.00347788	0.00038	0.281816	2.8e-05	-34.2663	1.9803	0.078	0.004	0.281811	-32.7196	2.11328
MC13ST-5-01_2nd	0.326034	0.00269454	0.0001	0.281829	3.2e-05	-33.8066	2.2632	0.078	0.004	0.281825	-32.2195	2.36731
MC13ST-5-03_2nd	0.208753	0.00159629	6.9e-05	0.281866	3.4e-05	-32.4982	2.40465	0.078	0.004	0.281864	-30.8542	2.50557
MC13ST-5-07,08_2nd	0.14335	0.000905963	5.1e-05	0.281866	1.5e-05	-32.4982	1.06088	0.078	0.004	0.281865	-30.8187	1.15993
MC13ST-5-10_2nd	0.231746	0.00191075	7.6e-05	0.281871	2.3e-05	-32.3214	1.62668	0.078	0.004	0.281868	-30.6936	1.72831
MC13ST-5-13_2nd	0.03876	0.000226869	2.3e-05	0.281899	2.4e-05	-31.3312	1.6974	0.078	0.004	0.281899	-29.6165	1.79357
MC13ST-5-02	0.129054	0.000926891	2.5e-05	0.281946	2.5e-05	-29.6692	1.76813	0.078	0.004	0.281945	-27.9902	1.8645
MC13ST-5-06_2nd	0.0532611	0.000320312	1.5e-05	0.281954	2.2e-05	-29.3863	1.55595	0.078	0.004	0.281954	-27.676	1.6513
MC13ST-5-27	0.213	0.00168416	2.7e-05	0.282451	4e-05	-11.8111	2.829	0.43	0.012	0.282437	-2.71651	3.12581	xenocrystic
MC13ST-5-12_2nd	0.236118	0.00193104	0.00011	0.282466	3e-05	-11.2807	2.12175	0.43	0.012	0.28245	-2.256	2.46592	xenocrystic
MC13ST-5-13	0.312821	0.00249828	0.00021	0.282482	2.6e-05	-10.7149	1.83885	0.43	0.012	0.282462	-1.85149	2.24008	xenocrystic
MC13ST-5-25	0.255117	0.00191587	3.1e-05	0.282488	2.9e-05	-10.5027	2.05103	0.43	0.012	0.282473	-1.47295	2.35012	xenocrystic
MC13ST-5-18	0.264548	0.00224191	9.3e-05	0.282501	2.4e-05	-10.043	1.6974	0.43	0.012	0.282483	-1.10582	2.03187	xenocrystic
MC13ST-5-04,05	0.203698	0.00173137	3.7e-05	0.282528	4.1e-05	-9.08818	2.89973	0.43	0.012	0.282514	-0.00445022	3.20224	xenocrystic
MC13ST-5-08	0.177874	0.00154342	2.8e-05	0.282536	2.7e-05	-8.80528	1.90958	0.43	0.012	0.282524	0.332345	2.20696	xenocrystic
MC13ST-5-23	0.19474	0.00144936	3.4e-05	0.282536	2.5e-05	-8.80528	1.76813	0.43	0.012	0.282524	0.359182	2.06893	xenocrystic
MC13ST-5-10	0.207871	0.00162693	8.8e-05	0.282539	3.6e-05	-8.69919	2.5461	0.43	0.012	0.282526	0.414709	2.87772	xenocrystic
MC13ST-5-16	0.173299	0.00122717	3.5e-05	0.282582	3.4e-05	-7.1786	2.40465	0.43	0.012	0.282572	2.05081	2.70603	xenocrystic
MC13ST-5-20	0.0953233	0.000704341	4.8e-05	0.282621	2.9e-05	-5.79946	2.05103	0.43	0.012	0.282615	3.58044	2.35982	xenocrystic
